# Supplementary material for: Visible-light-driven three-component annulation for the synthesis of highly functionalized 2-iminothiazolidin-4-ones without photocatalysts
Source: Royal Society of Chemistry journal article supplement (doi:10.1039/d4gc00375f), 2024-01-01
Supplement: d4gc00375f1.pdf [file d4gc00375f1.pdf]

## Supporting Information

### Visible-light-driven three-component annulation for the synthesis of highly functionalized 2-iminothiazolidin-4-ones without photocatalysts

Beining Yang,<sup>1</sup> Yatang Wang,<sup>1</sup> Xiaojuan Yang,<sup>1</sup> Yinyin Li,<sup>1</sup> Zhiying Zhang,<sup>1</sup>

Xiaofeng Hua,<sup>1</sup> Lu Ouyang,<sup>2</sup> Lvyin Zheng,<sup>\*1</sup> and Wei Guo<sup>\*1</sup>

<sup>1</sup>Key Laboratory of Organo-Pharmaceutical Chemistry of Jiangxi Province, Gannan Normal University, Ganzhou 341000, China

<sup>2</sup>School of Pharmacy, Gannan Medical University, Ganzhou 341000, Jiangxi, P. R. China

Fax: (+86) 0797-8393536; \*E-mail: zhenglvyin@126.com; [guoweigw@126.com](mailto:guoweigw@126.com)

#### List of Contents

|                                                                                              |            |
|----------------------------------------------------------------------------------------------|------------|
| <b>1. General Information.....</b>                                                           | <b>S2</b>  |
| <b>2. Representative Procedure for the Synthesis of <math>\alpha</math>-Diazoesters.....</b> | <b>S2</b>  |
| <b>3. Representative Procedure for the Synthesis of 2-Iminothiazolidin-4-ones.....</b>       | <b>S3</b>  |
| <b>4. X-Ray Crystallography Data of 5n.....</b>                                              | <b>S3</b>  |
| <b>5. Evaluation of Green Chemistry Metrics for the Synthesis of 4a.....</b>                 | <b>S8</b>  |
| <b>6. GC-MS of Compound 8.....</b>                                                           | <b>S9</b>  |
| <b>7. Characterization Data.....</b>                                                         | <b>S10</b> |
| <b>8. NMR Spectra.....</b>                                                                   | <b>S38</b> |

## 1. General Information

Melting points were obtained using a digital melting point apparatus and are uncorrected. Infrared (IR) spectra data were measured on an infrared spectrometer using KBr pellets.  $^1\text{H}$  and  $^{13}\text{C}\{^1\text{H}\}$  NMR spectra were recorded on a Bruker Advance 400 nuclear magnetic resonance (400 MHz NMR) spectrometer using  $\text{CDCl}_3$  or  $\text{DMSO}-d_6$  as the solution and tetramethylsilane (TMS) as the internal standard. Gas chromatography-mass spectrometry (GC-MS) data were collected using electron ionization. The data of high resolution mass spectrometry (HRMS) were recorded on a high-resolution mass spectrometer (LCMS-IT-TOF). The crystal data were recorded on a diffractometer (Rigaku Oxford diffraction supernova dual source, Cu at zero) equipped with an AtlasS2 charge-coupled device using Cu  $\text{K}\alpha$  radiation (1.54178 Å) in a scan mode. The reaction proceeded on the photoreaction instrument (WP-TEC-1020L, WATTCAS, China) with a heating mantle and a condenser system. The distance from the light source to the irradiation vessel is 5 mm. Thin-layer chromatography (TLC) and column chromatography were performed on commercially available 100–400 mesh silica gel. The starting materials, including isothiocyanates and amines were purchased from Innochem (Beijing) Technology Co., Ltd. of China. Unless otherwise noted, all purchased chemicals were used without further purification.

## 2. Representative Procedure for the Synthesis of $\alpha$ -Diazoesters<sup>1</sup>

Methyl arylacetate (10 mmol) and 4-acetamidobenzenesulfonyl azide (12 mmol, 1.2 equiv.) were dissolved in anhydrous MeCN (15 mL) and cooled to 0 °C. Then, DBU (15 mmol, 1.5 equiv.) was added drop-wise, and the mixture was stirred for overnight. Upon complete consumption of the starting materials, the reaction mixture was quenched with saturated aqueous solution of  $\text{NH}_4\text{Cl}$  (5 mL), and the water layer was extracted with ethyl acetate (3 × 30 mL), washed with brine (3 × 10 mL), dried over  $\text{NaSO}_4$ , and concentrated under reduced pressure. The residue was purified by flash chromatography on a silica gel using petroleum ether/ethyl acetate (v/v = 15/1) as an eluent to afford the desired product.

### 3. Representative Procedure for the Synthesis of 2-Iminothiazolidin-4-ones

In a flame-dried test tube with a stir bar, isothiocyanatobenzene **1a** (27.0 mg, 0.20 mmol), phenylmethanamine **2a** (21.4 mg, 0.20 mmol), and methyl 2-diazo-2-phenylacetate **3a** (17.6 mg, 0.10 mmol) were added into CH<sub>3</sub>CN (2.0 mL). The reaction was performed under a 10 W white LED at room temperature for 1.5-3.0 h. After the completion of the reaction, the solvent was evaporated and then filtered through an inch of silica gel. The filtrate was concentrated and purified by flash chromatography on a silica gel using petroleum ether/ethyl acetate (v/v = 8/1) as an eluent to provide the desired product **4a** (30.1 mg, yield of 84%).

### 4. X-Ray Crystallography Data of **5n**

The crystal growth procedure: Compound **5n** (20 mg) was dissolved into 1 mL of ethyl acetate, and then petroleum ether (2 mL) was added into the mixture. The mixture was evaporated slowly at room temperature to provide crystal **5n**. The ellipsoid contour % probability is 50%.

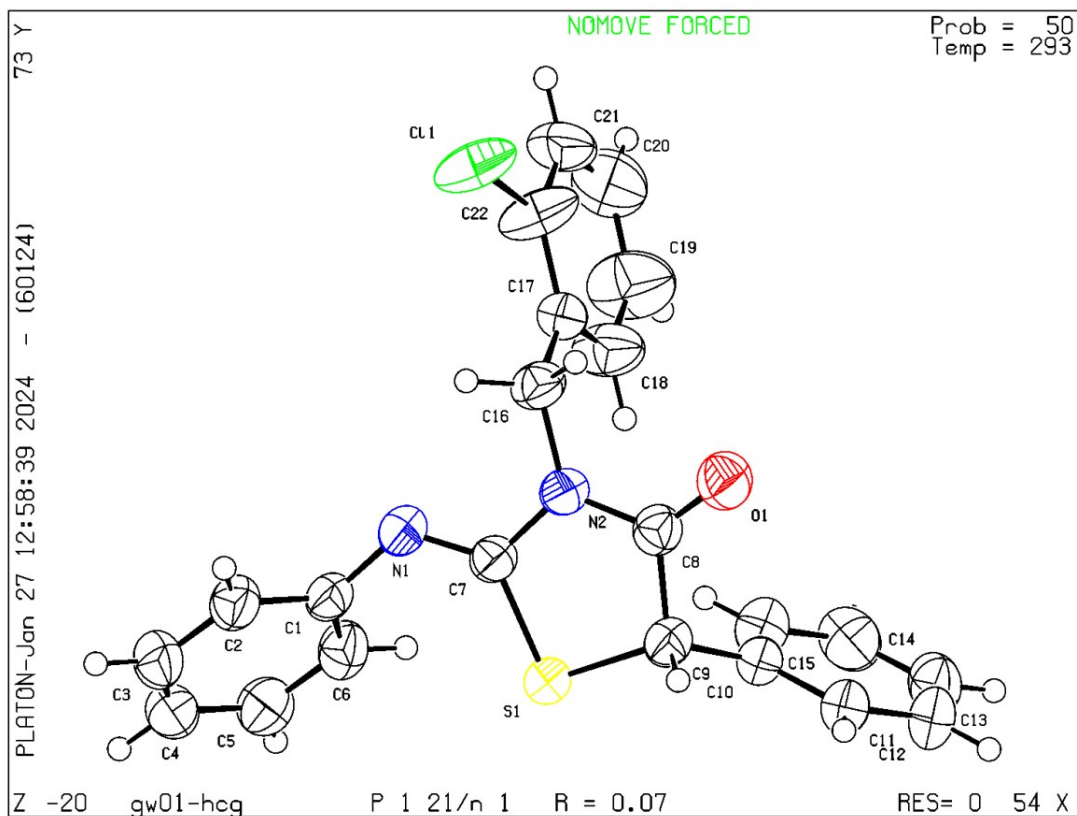

Figure S1. The Crystal Structure of **5n**

The CCDC number of **5n** is 2328961, the detail information please see **5n.cif** document.

## checkCIF/PLATON report

Structure factors have been supplied for datablock(s) gw01-hcg

THIS REPORT IS FOR GUIDANCE ONLY. IF USED AS PART OF A REVIEW PROCEDURE FOR PUBLICATION, IT SHOULD NOT REPLACE THE EXPERTISE OF AN EXPERIENCED CRYSTALLOGRAPHIC REFEREE.

No syntax errors found. CIF dictionary Interpreting this report

### Datablock: gw01-hcg

---

Bond precision: C-C = 0.0050 A Wavelength=1.54184  
Cell: a=5.71587(8) b=16.8188(3) c=20.0111(3)  
alpha=90 beta=90.7375(13) gamma=90  
Temperature: 293 K

|                        | Calculated        | Reported          |
|------------------------|-------------------|-------------------|
| Volume                 | 1923.59(5)        | 1923.59(5)        |
| Space group            | P 21/n            | P 1 21/n 1        |
| Hall group             | -P 2yn            | -P 2yn            |
| Moiety formula         | C22 H17 Cl N2 O S | C22 H17 Cl N2 O S |
| Sum formula            | C22 H17 Cl N2 O S | C22 H17 Cl N2 O S |
| Mr                     | 392.89            | 392.88            |
| Dx, g cm <sup>-3</sup> | 1.357             | 1.357             |
| Z                      | 4                 | 4                 |
| Mu (mm <sup>-1</sup> ) | 2.880             | 2.880             |
| F000                   | 816.0             | 816.0             |
| F000'                  | 820.73            |                   |
| h, k, lmax             | 7, 21, 25         | 7, 21, 25         |
| Nref                   | 4044              | 3872              |
| Tmin, Tmax             | 0.694, 0.750      | 0.792, 1.000      |
| Tmin'                  | 0.601             |                   |

Correction method= # Reported T Limits: Tmin=0.792 Tmax=1.000  
AbsCorr = MULTI-SCAN

Data completeness= 0.957 Theta(max)= 76.608

R(reflections)= 0.0685( 3643) wR2(reflections)=  
S = 1.008 Npar= 244 0.1876( 3872)

---

The following ALERTS were generated. Each ALERT has the format  
**test-name\_ALERT\_alert-type\_alert-level.**  
Click on the hyperlinks for more details of the test.

---

● **Alert level C**

PLAT230\_ALERT\_2\_C Hirshfeld Test Diff for C21 --C22 . 7.0 s.u.  
PLAT241\_ALERT\_2\_C High 'MainMol' Ueq as Compared to Neighbors of C19 Check  
PLAT242\_ALERT\_2\_C Low 'MainMol' Ueq as Compared to Neighbors of C17 Check  
PLAT340\_ALERT\_3\_C Low Bond Precision on C-C Bonds ..... 0.00495 Ang.  
PLAT906\_ALERT\_3\_C Large K Value in the Analysis of Variance ..... 2.524 Check  
PLAT911\_ALERT\_3\_C Missing FCF Refl Between Thmin & STh/L= 0.600 11 Report  
6 3 0, 1 0 1, -1 1 1, 0 3 2, 3 18 2, -1 1 4,  
-1 2 4, -6 9 4, 1 0 5, 0 11 19, 0 11 20,

---

● **Alert level G**

PLAT003\_ALERT\_2\_G Number of Uiso or Uij Restrained non-H Atoms ... 2 Report  
PLAT072\_ALERT\_2\_G SHELXL First Parameter in WGHT Unusually Large 0.10 Report  
PLAT177\_ALERT\_4\_G The CIF-Embedded .res File Contains DELU Records 1 Report  
PLAT178\_ALERT\_4\_G The CIF-Embedded .res File Contains SIMU Records 1 Report  
PLAT188\_ALERT\_3\_G A Non-default SIMU Restraint Value has been used 0.0004 Report  
PLAT199\_ALERT\_1\_G Reported \_cell\_measurement\_temperature ..... (K) 293 Check  
PLAT200\_ALERT\_1\_G Reported \_diffn\_ambient\_temperature ..... (K) 293 Check  
PLAT860\_ALERT\_3\_G Number of Least-Squares Restraints ..... 7 Note  
PLAT912\_ALERT\_4\_G Missing # of FCF Reflections Above STh/L= 0.600 160 Note  
PLAT913\_ALERT\_3\_G Missing # of Very Strong Reflections in FCF ... 1 Note  
0 3 2,  
PLAT933\_ALERT\_2\_G Number of HKL-OMIT Records in Embedded .res File 1 Note  
1 0 5,  
PLAT941\_ALERT\_3\_G Average HKL Measurement Multiplicity ..... 3.4 Low  
PLAT969\_ALERT\_5\_G The 'Henn et al.' R-Factor-gap value ..... 10.31 Note  
Predicted wR2: Based on SigI\*\*2 1.82 or SHELX Weight 19.23  
PLAT978\_ALERT\_2\_G Number C-C Bonds with Positive Residual Density. 0 Info

---

0 **ALERT level A** = Most likely a serious problem - resolve or explain  
0 **ALERT level B** = A potentially serious problem, consider carefully  
6 **ALERT level C** = Check. Ensure it is not caused by an omission or oversight  
14 **ALERT level G** = General information/check it is not something unexpected

2 ALERT type 1 CIF construction/syntax error, inconsistent or missing data  
7 ALERT type 2 Indicator that the structure model may be wrong or deficient  
7 ALERT type 3 Indicator that the structure quality may be low  
3 ALERT type 4 Improvement, methodology, query or suggestion  
1 ALERT type 5 Informative message, check

---

It is advisable to attempt to resolve as many as possible of the alerts in all categories. Often the minor alerts point to easily fixed oversights, errors and omissions in your CIF or refinement strategy, so attention to these fine details can be worthwhile. In order to resolve some of the more serious problems it may be necessary to carry out additional measurements or structure refinements. However, the purpose of your study may justify the reported deviations and the more serious of these should normally be commented upon in the discussion or experimental section of a paper or in the "special\_details" fields of the CIF. checkCIF was carefully designed to identify outliers and unusual parameters, but every test has its limitations and alerts that are not important in a particular case may appear. Conversely, the absence of alerts does not guarantee there are no aspects of the results needing attention. It is up to the individual to critically assess their own results and, if necessary, seek expert advice.

#### **Publication of your CIF in IUCr journals**

A basic structural check has been run on your CIF. These basic checks will be run on all CIFs submitted for publication in IUCr journals (*Acta Crystallographica*, *Journal of Applied Crystallography*, *Journal of Synchrotron Radiation*); however, if you intend to submit to *Acta Crystallographica Section C* or *E* or *IUCrData*, you should make sure that full publication checks are run on the final version of your CIF prior to submission.

#### **Publication of your CIF in other journals**

Please refer to the *Notes for Authors* of the relevant journal for any special instructions relating to CIF submission.

---

**PLATON version of 06/01/2024; check.def file version of 05/01/2024**

## 5. Evaluation of Green Chemistry Metrics for the Synthesis of 4a

|                                                                                                                                                                                                                                                         |                                                        |         |           |           |
|---------------------------------------------------------------------------------------------------------------------------------------------------------------------------------------------------------------------------------------------------------|--------------------------------------------------------|---------|-----------|-----------|
| $\text{Atom economy (\%)} = \frac{\text{Molecular mass of desired product}}{\text{Molecular mass of all reactants}} \times 100$ $\text{Reaction mass efficiency (\%)} = \frac{\text{Mass of desired product}}{\text{Mass of all reactants}} \times 100$ |                                                        |         |           |           |
| Reactant 1                                                                                                                                                                                                                                              | Isothiocyanatobenzene                                  | 0.135 g | 1.0 mmol  | FW 135.01 |
| Reactant 2                                                                                                                                                                                                                                              | Phenylmethanamine                                      | 0.107 g | 1.0 mmol  | FW 107.07 |
| Reactant 3                                                                                                                                                                                                                                              | Methyl 2-Diazo-2-phenylacetate                         | 0.176 g | 1.0 mmol  | FW 176.06 |
| Additive Solvent                                                                                                                                                                                                                                        | CH <sub>3</sub> CN (4 mL)                              | 3.143 g | -         | -         |
| Auxiliary                                                                                                                                                                                                                                               | -                                                      | -       | -         | -         |
| Recycled solvent                                                                                                                                                                                                                                        | CH <sub>3</sub> CN (3 mL)                              | 2.384 g | -         | -         |
| Product                                                                                                                                                                                                                                                 | (Z)-3-Benzyl-5-phenyl-2-(phenylimino)thiazolidin-4-one | 0.212 g | 0.59 mmol | FW 358.11 |

Product yield = 59%

$$E\text{-factor} = \frac{0.135 + 0.107 + 0.176 + 3.143 - (2.384 + 0.212)}{0.212 \text{ g}} = 4.55 \text{ Kg waste/1 Kg product}$$

$$\text{Atom economy} = \frac{358.11}{418.14} \times 100 = 85.6\%$$

$$\text{Atom efficiency} = 59\% \times 85.6\% / 100 = 50.5\%$$

$$\text{Carbon efficiency} = \frac{22}{7+7+9} \times 100 = 95.7\%$$

$$\text{Reaction mass efficiency} = \frac{0.212 \text{ g}}{0.135 \text{ g} + 0.107 \text{ g} + 0.176 \text{ g}} \times 100 = 50.7\%$$

**Table S1** Evaluation of green chemistry metrics for the synthesis of **4a** using a stoichiometric (equimolar) amount of reactants.

## 6. GC-MS of compound 8



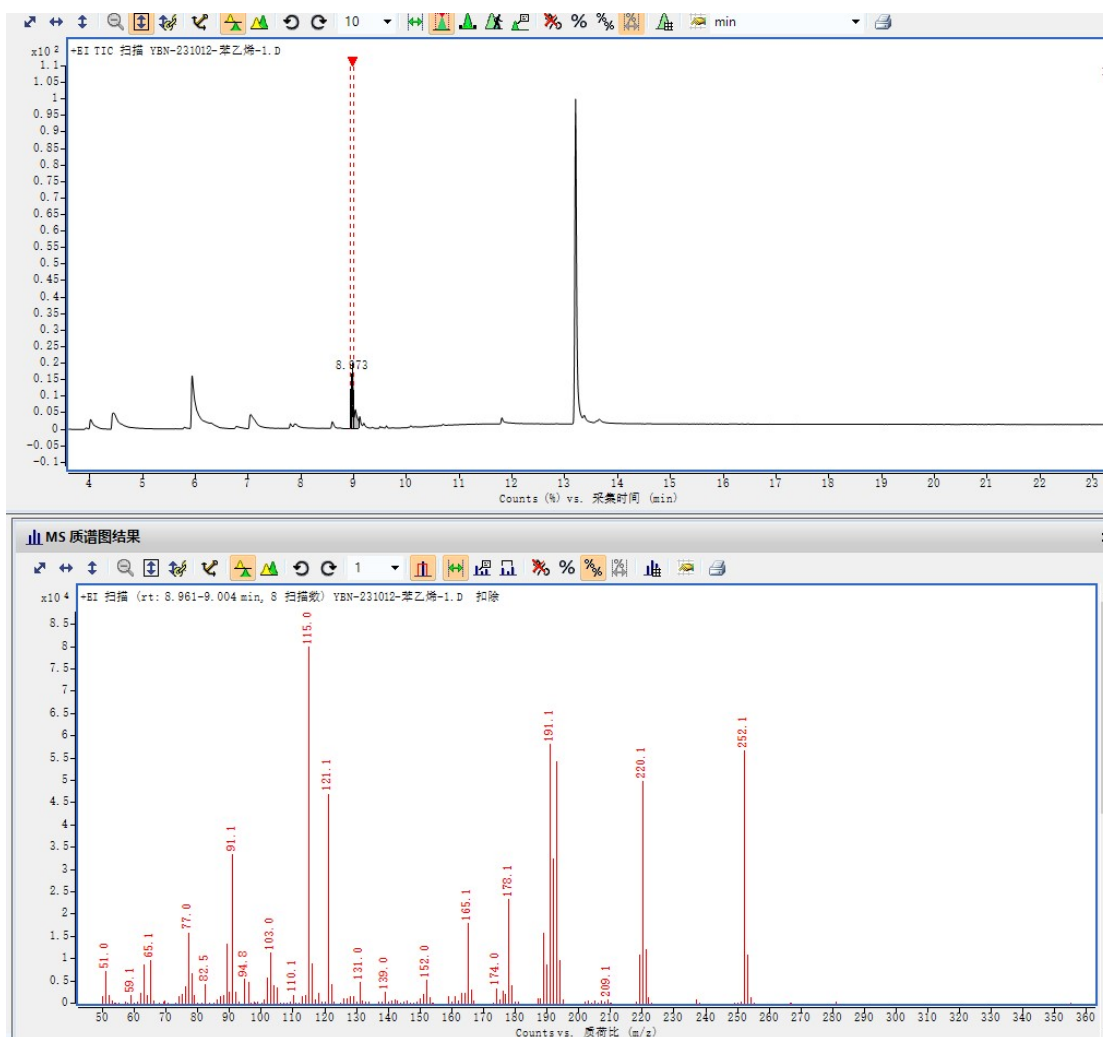

Figure S1 GC-MS of compound **8**

MS (EI, 70 eV)  $m/z$  252, 220, 191, 178, 165, 121, 115, 91, 77.

## 7. Characterization Data

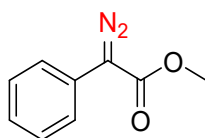

*Methyl  $\alpha$ -Diazo- $\alpha$ -phenylacetate (3a).*<sup>2</sup> Eluent: petroleum ether/ethyl acetate (v/v = 15/1); red oil in 74% yield (1.30 g, 7.40 mmol); IR (KBr,  $\text{cm}^{-1}$ ) 3060, 3026, 2953, 2845, 2089, 1706, 1598, 1576, 1499, 1435, 1353, 1287, 1250, 1193, 1155, 1077, 1052, 1026, 909, 756, 691;  $^1\text{H}$  NMR (400 MHz,  $\text{CDCl}_3$ , ppm)  $\delta$  7.49-7.46 (m, 2H), 7.40-7.36 (m, 2H), 7.20-7.16 (m, 1H), 3.86 (s, 3H);  $^{13}\text{C}\{^1\text{H}\}$  NMR (100 MHz,  $\text{CDCl}_3$ , ppm)  $\delta$  165.6, 129.0, 125.9, 125.5, 124.0, 63.3, 52.0.

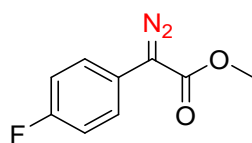

*Methyl 2-Diazo-2-(4-fluorophenyl)acetate (3b).*<sup>2</sup> Eluent: petroleum ether/ethyl acetate (v/v = 15/1); orange oil in 70% yield (1.36 g, 7.00 mmol); IR (KBr,  $\text{cm}^{-1}$ ) 3047, 3003, 2956, 2848, 2092, 1705, 1606, 1511, 1438, 1349, 1289, 1251, 1193, 1160, 1102, 1045, 1013, 911, 833, 741;  $^1\text{H}$  NMR (400 MHz,  $\text{CDCl}_3$ , ppm)  $\delta$  7.44 (dd,  $J$  = 8.8, 5.2 Hz, 2H), 7.09 (t,  $J$  = 8.7 Hz, 2H), 3.86 (s, 3H);  $^{13}\text{C}\{^1\text{H}\}$  NMR (100 MHz,  $\text{CDCl}_3$ , ppm)  $\delta$  165.6, 161.0 (d,  $J$  = 245.0 Hz), 125.9 (d,  $J$  = 8.0 Hz), 121.2 (d,  $J$  = 3.0 Hz), 116.0 (d,  $J$  = 22.0 Hz), 62.5, 52.1.

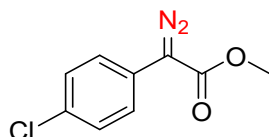

*Methyl  $\alpha$ -(4-Chlorophenyl)- $\alpha$ -diazoacetate (3c).*<sup>2</sup> Eluent: petroleum ether/ethyl acetate (v/v = 15/1); orange solid in 72% yield (1.51 g, 7.20 mmol); mp 52-54  $^{\circ}\text{C}$ ; IR (KBr,  $\text{cm}^{-1}$ ) 3076, 3045, 3001, 2954, 2920, 2849, 2098, 1698, 1657, 1497, 1437, 1410, 1358, 1281, 1250, 1195, 1045, 834, 815, 741;  $^1\text{H}$  NMR (400 MHz,  $\text{CDCl}_3$ , ppm)  $\delta$  7.41-7.38 (m, 2H), 7.34-7.31 (m, 2H), 3.85 (s, 3H);  $^{13}\text{C}\{^1\text{H}\}$  NMR (100 MHz,  $\text{CDCl}_3$ , ppm)  $\delta$  165.2, 131.4, 129.1, 125.0, 124.1, 63.0, 52.1.

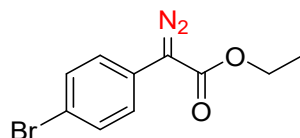

*Ethyl α-(4-Bromophenyl)-α-diazoacetate (3d)*.<sup>3</sup> Eluent: petroleum ether/ethyl acetate (v/v = 15/1); orange solid in 86% yield (2.30 g, 8.60 mmol); mp 53-55 °C; IR (KBr, cm<sup>-1</sup>) 2990, 2911, 2102, 1698, 1585, 1489, 1390, 1371, 1339, 1274, 1239, 1172, 1078, 1048, 828, 815; <sup>1</sup>H NMR (400 MHz, CDCl<sub>3</sub>, ppm) δ 7.46-7.44 (m, 2H), 7.34-7.32 (m, 2H), 4.31 (q, *J* = 7.1 Hz, 2H), 1.32 (t, *J* = 7.1 Hz, 3H); <sup>13</sup>C{<sup>1</sup>H} NMR (100 MHz, CDCl<sub>3</sub>, ppm) δ 164.7, 131.9, 125.2, 124.9, 119.1, 63.2, 61.2, 14.5.

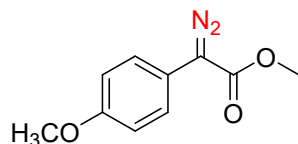

*Methyl α-Diazo-α-(4-methoxyphenyl)acetate (3e)*.<sup>3</sup> Eluent: petroleum ether/ethyl acetate (v/v = 10/1); red solid in 52% yield (1.07 g, 5.20 mmol); mp 46-47 °C; IR (KBr, cm<sup>-1</sup>) 3002, 2954, 2838, 2085, 1703, 1610, 1513, 1437, 1351, 1297, 1258, 1184, 1157, 1051, 1029, 829, 740; <sup>1</sup>H NMR (400 MHz, CDCl<sub>3</sub>, ppm) δ 7.38 (d, *J* = 8.9 Hz, 2H), 6.94 (d, *J* = 8.9 Hz, 2H), 3.85 (s, 3H), 3.81 (s, 3H); <sup>13</sup>C{<sup>1</sup>H} NMR (100 MHz, CDCl<sub>3</sub>, ppm) δ 166.2, 158.1, 126.0, 116.9, 114.6, 60.4, 55.4, 52.0.

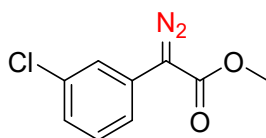

*Methyl α-(3-Chlorophenyl)-α-diazoacetate (3f)*.<sup>2</sup> Eluent: petroleum ether/ethyl acetate (v/v = 15/1); orange solid in 54% yield (1.13 g, 5.40 mmol); mp 52-53 °C; IR (KBr, cm<sup>-1</sup>) 3008, 2957, 2919, 2850, 2093, 1698, 1595, 1562, 1482, 1441, 1359, 1246, 1161, 1047, 892, 777, 740; <sup>1</sup>H NMR (400 MHz, CDCl<sub>3</sub>, ppm) δ 7.52 (s, 1H), 7.31-7.27 (m, 2H), 7.12 (dt, *J* = 7.0, 1.9 Hz, 1H), 3.85 (s, 3H); <sup>13</sup>C{<sup>1</sup>H} NMR (100 MHz, CDCl<sub>3</sub>, ppm) δ 165.0, 135.0, 130.0, 127.7, 125.7, 123.6, 121.5, 63.2, 52.1.

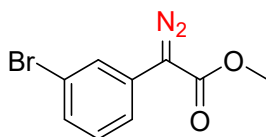

*Methyl α-(3-Bromophenyl)-α-diazoacetate (3g)*.<sup>2</sup> Eluent: petroleum ether/ethyl acetate (v/v = 15/1); orange solid in 56% yield (1.40 g, 5.50 mmol); mp 51-53 °C; IR (KBr, cm<sup>-1</sup>) 3072, 3001, 2953, 2092, 1707, 1591, 1557, 1479, 1437, 1355, 1247, 1193, 1157, 1047, 993, 886, 776, 719; <sup>1</sup>H NMR (400 MHz, CDCl<sub>3</sub>, ppm) δ 7.67 (t, *J* = 1.9

Hz, 1H), 7.35 (d,  $J = 7.8$  Hz, 1H), 7.27 (d,  $J = 7.9$  Hz, 1H), 7.21 (t,  $J = 7.9$  Hz, 1H), 3.85 (s, 3H);  $^{13}\text{C}\{^1\text{H}\}$  NMR (100 MHz,  $\text{CDCl}_3$ , ppm)  $\delta$  164.9, 130.3, 128.7, 128.0, 126.4, 123.1, 122.0, 63.1, 52.1.

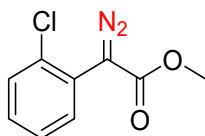

*Methyl  $\alpha$ -(2-Chlorophenyl)- $\alpha$ -diazoacetate (3h).*<sup>2</sup> Eluent: petroleum ether/ethyl acetate (v/v = 15/1); yellow oil in 68% yield (1.43 g, 6.80 mmol); IR (KBr,  $\text{cm}^{-1}$ ) 3070, 3000, 2953, 2844, 2099, 1710, 1590, 1480, 1435, 1352, 1287, 1243, 1194, 1158, 1077, 1029, 916, 756, 708;  $^1\text{H}$  NMR (400 MHz,  $\text{CDCl}_3$ , ppm)  $\delta$  7.52 (d,  $J = 7.8$  Hz, 1H), 7.38 (d,  $J = 7.8$  Hz, 1H), 7.30-7.21 (m, 2H), 3.80 (s, 3H);  $^{13}\text{C}\{^1\text{H}\}$  NMR (100 MHz,  $\text{CDCl}_3$ , ppm)  $\delta$  165.8, 133.7, 132.3, 130.0, 129.6, 127.1, 123.9, 61.8, 52.2.

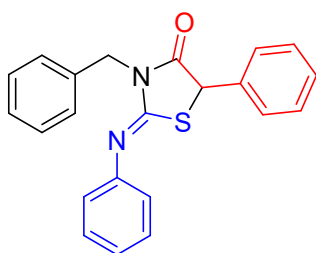

*(Z)-3-Benzyl-5-phenyl-2-(phenylimino)thiazolidin-4-one (4a).* Eluent: petroleum ether/ethyl acetate (v/v = 8/1); yellow liquid in 84% yield (30.1 mg, 0.08 mmol); IR (KBr,  $\text{cm}^{-1}$ ) 3061, 3031, 2922, 2850, 1725, 1627, 1591, 1491, 1452, 1425, 1381, 1333, 1266, 1154, 1077, 1027, 976, 834, 737, 697;  $^1\text{H}$  NMR (400 MHz,  $\text{CDCl}_3$ , ppm)  $\delta$  7.51 (d,  $J = 8.0$  Hz, 2H), 7.34-7.26 (m, 10H), 7.10 (t,  $J = 8.0$  Hz, 1H), 7.00 (d,  $J = 8.0$  Hz, 2H), 5.12-4.99 (m, 3H);  $^{13}\text{C}\{^1\text{H}\}$  NMR (100 MHz,  $\text{CDCl}_3$ , ppm)  $\delta$  172.9, 152.7, 148.0, 136.2, 135.6, 129.3, 129.2, 129.1, 128.9, 128.6, 128.3, 128.0, 124.8, 121.2, 51.8, 46.7; MS (EI, 70 eV)  $m/z$  358, 270, 207, 121, 91, 77; HRMS (ESI)  $m/z$   $[\text{M} + \text{H}]^+$  calcd for  $\text{C}_{22}\text{H}_{19}\text{N}_2\text{OS}$  359.1213, found 359.1230.

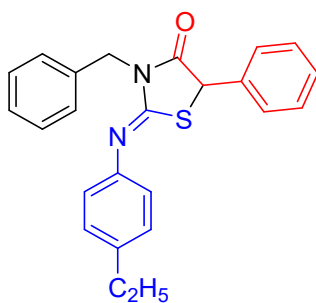

*(Z)*-3-Benzyl-2-((4-ethylphenyl)imino)-5-phenylthiazolidin-4-one (**4b**). Eluent: petroleum ether/ethyl acetate (v/v = 8/1); colorless liquid in 83% yield (32.2 mg, 0.08 mmol); IR (KBr,  $\text{cm}^{-1}$ ) 3062, 3030, 2963, 2929, 2871, 1723, 1627, 1603, 1569, 1505, 1495, 1454, 1426, 1380, 1330, 1177, 1153, 1079, 974, 839, 755, 698;  $^1\text{H}$  NMR (400 MHz,  $\text{CDCl}_3$ , ppm)  $\delta$  7.52 (d,  $J = 7.9$  Hz, 2H), 7.34-7.15 (m, 10H), 6.93 (d,  $J = 7.9$  Hz, 2H), 5.13-5.00 (m, 3H), 2.62 (q,  $J = 7.7$  Hz, 2H), 1.22 (t,  $J = 7.7$  Hz, 3H);  $^{13}\text{C}\{^1\text{H}\}$  NMR (100 MHz,  $\text{CDCl}_3$ , ppm)  $\delta$  172.9, 152.2, 145.5, 140.7, 136.2, 135.7, 129.1, 128.8, 128.6, 128.5, 128.3, 127.9, 121.0, 51.7, 46.6, 28.4, 15.7; MS (EI, 70 eV)  $m/z$  386, 268, 165, 121, 91, 77; HRMS (ESI)  $m/z$   $[\text{M} + \text{H}]^+$  calcd for  $\text{C}_{24}\text{H}_{23}\text{N}_2\text{OS}$  387.1526, found 387.1543.

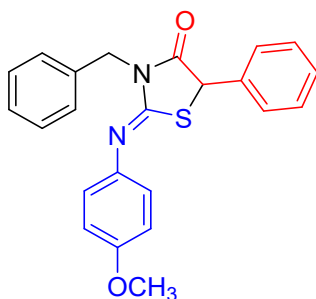

*(Z)*-3-Benzyl-2-((4-methoxyphenyl)imino)-5-phenylthiazolidin-4-one (**4c**). Eluent: petroleum ether/ethyl acetate (v/v = 5/1); yellow liquid in 81% yield (31.4 mg, 0.08 mmol); IR (KBr,  $\text{cm}^{-1}$ ) 3062, 3033, 3003, 2950, 2834, 1727, 1621, 1506, 1454, 1426, 1381, 1290, 1247, 1172, 1079, 1032, 975, 834, 783, 716, 697;  $^1\text{H}$  NMR (400 MHz,  $\text{CDCl}_3$ , ppm)  $\delta$  7.50 (d,  $J = 8.0$  Hz, 2H), 7.31-7.23 (m, 8H), 6.97-6.84 (m, 4H), 5.10-4.98 (m, 3H), 3.71 (s, 3H);  $^{13}\text{C}\{^1\text{H}\}$  NMR (100 MHz,  $\text{CDCl}_3$ , ppm)  $\delta$  172.9, 157.0, 152.2, 141.1, 136.3, 135.8, 129.2, 129.1, 128.8, 128.6, 128.3, 128.0, 122.3, 114.6, 55.5, 51.7, 46.7; MS (EI, 70 eV)  $m/z$  388, 300, 121, 91, 77; HRMS (ESI)  $m/z$   $[\text{M} + \text{H}]^+$  calcd for  $\text{C}_{23}\text{H}_{21}\text{N}_2\text{O}_2\text{S}$  389.1318, found 389.1336.

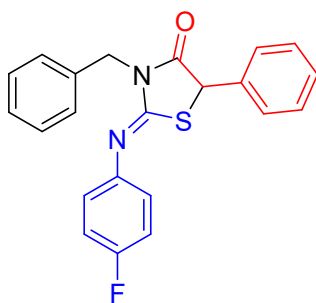

*(Z)*-3-Benzyl-2-((4-fluorophenyl)imino)-5-phenylthiazolidin-4-one (**4d**). Eluent: petroleum ether/ethyl acetate (v/v = 8/1); yellow liquid in 58% yield (21.8 mg, 0.06 mmol); IR (KBr,  $\text{cm}^{-1}$ ) 3063, 3032, 2946, 1727, 1624, 1503, 1453, 1427, 1378, 1265, 1231, 1150, 1092, 1079, 1029, 975, 924, 838, 794, 695;  $^1\text{H}$  NMR (400 MHz,  $\text{CDCl}_3$ , ppm)  $\delta$  7.51-7.48 (m, 2H), 7.35-7.27 (m, 8H), 7.04-6.93 (m, 4H), 5.13-4.99 (m, 3H);  $^{13}\text{C}\{^1\text{H}\}$  NMR (100 MHz,  $\text{CDCl}_3$ , ppm)  $\delta$  172.8, 160.1 (d,  $J = 241.0$  Hz), 153.2 (d,  $J = 2.0$  Hz), 143.9 (d,  $J = 3.0$  Hz), 136.0, 135.4, 129.1, 129.0, 128.9, 128.6, 128.2, 128.0, 122.5 (d,  $J = 8.0$  Hz), 116.0 (d,  $J = 23.0$  Hz), 51.7, 46.6; MS (EI, 70 eV)  $m/z$  376, 258, 225, 121, 91, 77; HRMS (ESI)  $m/z$   $[\text{M} + \text{H}]^+$  calcd for  $\text{C}_{22}\text{H}_{18}\text{N}_2\text{OSF}$  377.1118, found 377.1133.

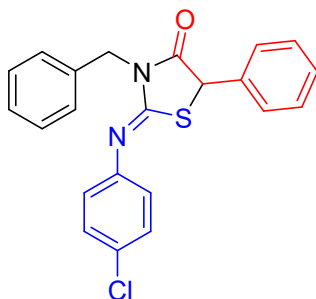

*(Z)*-3-Benzyl-2-((4-chlorophenyl)imino)-5-phenylthiazolidin-4-one (**4e**). Eluent: petroleum ether/ethyl acetate (v/v = 8/1); colorless liquid in 68% yield (26.7 mg, 0.07 mmol); IR (KBr,  $\text{cm}^{-1}$ ) 3087, 3063, 3032, 2946, 1726, 1627, 1587, 1485, 1453, 1426, 1379, 1330, 1265, 1234, 1154, 1084, 1011, 975, 835, 732, 697;  $^1\text{H}$  NMR (400 MHz,  $\text{CDCl}_3$ , ppm)  $\delta$  7.48 (d,  $J = 8.0$  Hz, 2H), 7.31-7.24 (m, 10H), 6.91 (d,  $J = 8.0$  Hz, 2H), 5.08-4.95 (m, 3H);  $^{13}\text{C}\{^1\text{H}\}$  NMR (100 MHz,  $\text{CDCl}_3$ , ppm)  $\delta$  172.8, 153.5, 146.6, 136.1, 135.5, 130.1, 129.5, 129.2, 129.1, 129.0, 128.7, 128.3, 128.1, 122.7, 51.9, 46.7; MS (EI, 70 eV)  $m/z$  392, 304, 121, 91, 77; HRMS (ESI)  $m/z$   $[\text{M} + \text{H}]^+$  calcd for  $\text{C}_{22}\text{H}_{18}\text{N}_2\text{OSCl}$  393.0823, found 393.0838.

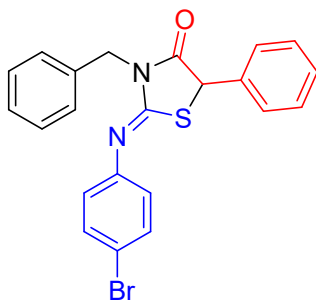

*(Z)*-3-Benzyl-2-((4-bromophenyl)imino)-5-phenylthiazolidin-4-one (**4f**). Eluent: petroleum ether/ethyl acetate (v/v = 8/1); yellow liquid in 74% yield (32.3 mg, 0.07 mmol); IR (KBr,  $\text{cm}^{-1}$ ) 3086, 3063, 3032, 2947, 1726, 1634, 1581, 1482, 1454, 1427, 1378, 1265, 1233, 1151, 1100, 1070, 1007, 974, 832, 733, 696;  $^1\text{H}$  NMR (400 MHz,  $\text{CDCl}_3$ , ppm)  $\delta$  7.47 (d,  $J = 8.0$  Hz, 2H), 7.40 (d,  $J = 8.0$  Hz, 2H), 7.29-7.25 (m, 8H), 6.87-6.84 (m, 2H), 5.07-4.95 (m, 3H);  $^{13}\text{C}\{^1\text{H}\}$  NMR (100 MHz,  $\text{CDCl}_3$ , ppm)  $\delta$  172.8, 153.4, 147.0, 136.0, 135.4, 132.4, 129.2, 129.1, 129.0, 128.7, 128.3, 128.1, 123.1, 117.9, 51.9, 46.7; MS (EI, 70 eV)  $m/z$  438, 320, 121, 91, 77; HRMS (ESI)  $m/z$   $[\text{M} + \text{H}]^+$  calcd for  $\text{C}_{22}\text{H}_{18}\text{N}_2\text{OSBr}$  437.0318, found 437.0336.

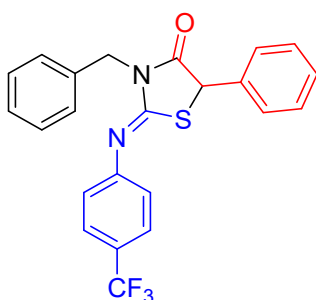

*(Z)*-3-Benzyl-5-phenyl-2-((4-(trifluoromethyl)phenyl)imino)thiazolidin-4-one (**4g**). Eluent: petroleum ether/ethyl acetate (v/v = 8/1); yellow liquid in 59% yield (25.1 mg, 0.06 mmol); IR (KBr,  $\text{cm}^{-1}$ ) 3065, 3033, 2947, 1729, 1609, 1512, 1495, 1454, 1380, 1320, 1240, 1106, 1065, 1014, 976, 923, 848, 753, 697;  $^1\text{H}$  NMR (400 MHz,  $\text{CDCl}_3$ , ppm)  $\delta$  7.56 (d,  $J = 8.3$  Hz, 2H), 7.50-7.48 (m, 2H), 7.32-7.23 (m, 8H), 7.06 (d,  $J = 8.3$  Hz, 2H), 5.09-4.96 (m, 3H);  $^{13}\text{C}\{^1\text{H}\}$  NMR (100 MHz,  $\text{CDCl}_3$ , ppm)  $\delta$  172.8, 154.1, 151.2 (q,  $J = 1.0$  Hz), 136.0, 135.3, 129.3, 129.1, 129.0, 128.7, 128.3, 128.2, 126.6 (d,  $J = 4.0$  Hz), 126.9, 125.5 (d,  $J = 270.0$  Hz), 121.6, 51.9, 46.8; MS (EI, 70 eV)  $m/z$  426, 308, 121, 91, 77; HRMS (ESI)  $m/z$   $[\text{M} + \text{H}]^+$  calcd for  $\text{C}_{23}\text{H}_{18}\text{N}_2\text{OSF}_3$  427.1087, found 427.1100.

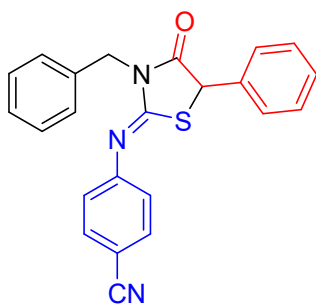

*(Z)*-4-((3-Benzyl-4-oxo-5-phenylthiazolidin-2-ylidene)amino)benzonitrile (**4h**).

Eluent: petroleum ether/ethyl acetate (v/v = 5/1); colorless liquid in 67% yield (25.7 mg, 0.07 mmol); IR (KBr,  $\text{cm}^{-1}$ ) 3063, 3033, 2947, 2225, 1729, 1629, 1590, 1497, 1426, 1378, 1334, 1241, 1154, 1108, 1079, 979, 846, 736, 700;  $^1\text{H}$  NMR (400 MHz,  $\text{CDCl}_3$ , ppm)  $\delta$  7.59-7.56 (m, 2H), 7.47 (d,  $J = 7.5$  Hz, 2H), 7.35-7.26 (m, 8H), 7.05 (d,  $J = 7.5$  Hz, 2H), 5.17-4.97 (m, 3H);  $^{13}\text{C}\{^1\text{H}\}$  NMR (100 MHz,  $\text{CDCl}_3$ , ppm)  $\delta$  172.7, 154.4, 152.0, 135.7, 135.0, 133.5, 129.3, 129.1, 129.0, 128.7, 128.3, 128.2, 122.2, 119.1, 108.0, 52.0, 46.8; MS (EI, 70 eV)  $m/z$  383, 265, 232, 121, 91, 77; HRMS (ESI)  $m/z$   $[\text{M} + \text{H}]^+$  calcd for  $\text{C}_{23}\text{H}_{18}\text{N}_3\text{OS}$  384.1165, found 384.1184.

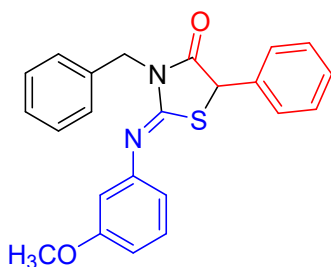

*(Z)*-3-Benzyl-2-((3-methoxyphenyl)imino)-5-phenylthiazolidin-4-one (**4i**). Eluent: petroleum ether/ethyl acetate (v/v = 8/1); yellow liquid in 74% yield (28.7 mg, 0.07 mmol); IR (KBr,  $\text{cm}^{-1}$ ) 3063, 3031, 3005, 2939, 2834, 1724, 1633, 1595, 1485, 1453, 1428, 1380, 1330, 1282, 1264, 1137, 1079, 1043, 977, 859, 781, 743, 697;  $^1\text{H}$  NMR (400 MHz,  $\text{CDCl}_3$ , ppm)  $\delta$  7.51 (d,  $J = 4.0$  Hz, 2H), 7.34-7.19 (m, 9H), 6.68-6.56 (m, 3H), 5.12-4.99 (m, 3H), 3.76 (s, 3H);  $^{13}\text{C}\{^1\text{H}\}$  NMR (100 MHz,  $\text{CDCl}_3$ , ppm)  $\delta$  172.9, 160.5, 152.9, 149.2, 136.1, 135.6, 130.1, 129.13, 129.05, 128.8, 128.6, 128.3, 128.0, 113.4, 110.3, 107.1, 55.3, 51.7, 46.6; MS (EI, 70 eV)  $m/z$  388, 300, 121, 91, 77; HRMS (ESI)  $m/z$   $[\text{M} + \text{H}]^+$  calcd for  $\text{C}_{23}\text{H}_{21}\text{N}_2\text{O}_2\text{S}$  389.1318, found 389.1338.



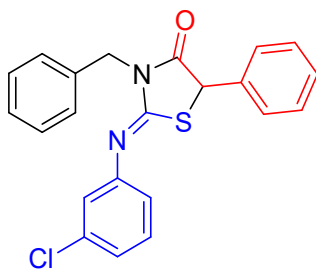

(*Z*)-3-Benzyl-2-((3-chlorophenyl)imino)-5-phenylthiazolidin-4-one (**4j**). Eluent: petroleum ether/ethyl acetate (v/v = 8/1); colorless liquid in 61% yield (23.9 mg, 0.06 mmol); IR (KBr,  $\text{cm}^{-1}$ ) 3063, 3032, 2946, 1721, 1589, 1494, 1469, 1453, 1426, 1335, 1264, 1228, 1154, 1075, 1029, 977, 873, 785, 734, 692;  $^1\text{H}$  NMR (400 MHz,  $\text{CDCl}_3$ , ppm)  $\delta$  7.47 (d,  $J = 7.8$  Hz, 2H), 7.32-7.17 (m, 9H), 7.07-7.00 (m, 2H), 6.86 (d,  $J = 7.8$  Hz, 1H), 5.08-4.95 (m, 3H);  $^{13}\text{C}\{^1\text{H}\}$  NMR (100 MHz,  $\text{CDCl}_3$ , ppm)  $\delta$  172.8, 153.9, 149.3, 136.0, 135.4, 134.8, 130.4, 129.2, 129.1, 129.0, 128.7, 128.3, 128.1, 124.8, 121.6, 119.5, 51.9, 46.7; MS (EI, 70 eV)  $m/z$  392, 357, 121, 91, 77; HRMS (ESI)  $m/z$   $[\text{M} + \text{H}]^+$  calcd for  $\text{C}_{22}\text{H}_{18}\text{N}_2\text{OSCl}$  393.0823, found 393.0843.

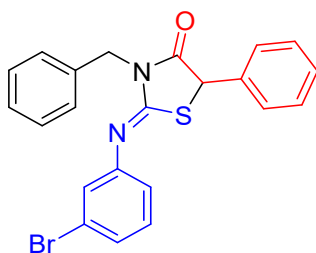

(*Z*)-3-Benzyl-2-((3-bromophenyl)imino)-5-phenylthiazolidin-4-one (**4k**). Eluent: petroleum ether/ethyl acetate (v/v = 8/1); colorless liquid in 74% yield (32.3 mg, 0.07 mmol); IR (KBr,  $\text{cm}^{-1}$ ) 3062, 3031, 2947, 1727, 1631, 1582, 1494, 1469, 1454, 1426, 1378, 1332, 1227, 1154, 1079, 1029, 977, 851, 783, 729, 695;  $^1\text{H}$  NMR (400 MHz,  $\text{CDCl}_3$ , ppm)  $\delta$  7.47 (d,  $J = 7.8$  Hz, 2H), 7.31-7.10 (m, 11H), 6.90 (d,  $J = 7.8$  Hz, 1H), 5.07-4.94 (m, 3H);  $^{13}\text{C}\{^1\text{H}\}$  NMR (100 MHz,  $\text{CDCl}_3$ , ppm)  $\delta$  172.8, 154.0, 149.4, 136.0, 135.4, 130.7, 129.3, 129.1, 129.0, 128.7, 128.4, 128.2, 127.7, 124.5, 122.9, 120.0, 51.9, 46.7; MS (EI, 70 eV)  $m/z$  438, 357, 121, 91, 77; HRMS (ESI)  $m/z$   $[\text{M} + \text{H}]^+$  calcd for  $\text{C}_{22}\text{H}_{18}\text{N}_2\text{OSBr}$  437.0318, found 437.0336.

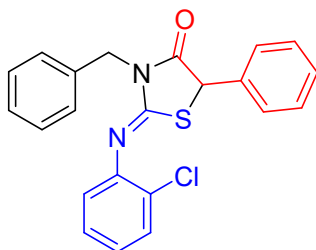

*(Z)*-3-Benzyl-2-((2-chlorophenyl)imino)-5-phenylthiazolidin-4-one (**4l**). Eluent: petroleum ether/ethyl acetate (v/v = 8/1); yellow liquid in 56% yield (22.0 mg, 0.06 mmol); IR (KBr,  $\text{cm}^{-1}$ ) 3063, 3032, 2946, 1728, 1630, 1584, 1495, 1472, 1454, 1427, 1379, 1332, 1263, 1165, 1079, 1057, 1032, 976, 839, 756, 729, 698;  $^1\text{H}$  NMR (400 MHz,  $\text{CDCl}_3$ , ppm)  $\delta$  7.54 (d,  $J = 7.8$  Hz, 2H), 7.37-7.10 (m, 10H), 6.97-6.94 (m, 2H), 5.11-4.99 (m, 3H);  $^{13}\text{C}\{^1\text{H}\}$  NMR (100 MHz,  $\text{CDCl}_3$ , ppm)  $\delta$  172.9, 155.2, 145.4, 136.0, 135.5, 130.4, 129.3, 129.0, 128.7, 128.4, 128.2, 127.7, 126.7, 125.8, 122.1, 52.1, 46.9; MS (EI, 70 eV)  $m/z$  392, 357, 121, 91, 77; HRMS (ESI)  $m/z$   $[\text{M} + \text{H}]^+$  calcd for  $\text{C}_{22}\text{H}_{18}\text{N}_2\text{OSCl}$  393.0823, found 393.0842.

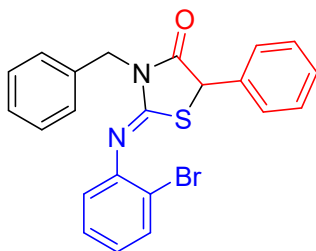

*(Z)*-3-Benzyl-2-((2-bromophenyl)imino)-5-phenylthiazolidin-4-one (**4m**). Eluent: petroleum ether/ethyl acetate (v/v = 8/1); colorless liquid in 67% yield (29.2 mg, 0.07 mmol); IR (KBr,  $\text{cm}^{-1}$ ) 3062, 3032, 2946, 1729, 1633, 1581, 1495, 1467, 1454, 1428, 1379, 1332, 1261, 1164, 1119, 1079, 1045, 1028, 975, 837, 755, 725, 697;  $^1\text{H}$  NMR (400 MHz,  $\text{CDCl}_3$ , ppm)  $\delta$  7.56-7.52 (m, 3H), 7.28-7.14 (m, 9H), 6.95-6.85 (m, 2H), 5.11-4.98 (m, 3H);  $^{13}\text{C}\{^1\text{H}\}$  NMR (100 MHz,  $\text{CDCl}_3$ , ppm)  $\delta$  172.9, 155.2, 146.8, 136.0, 135.4, 133.5, 129.32, 129.27, 129.0, 128.7, 128.4, 128.2, 126.1, 121.9, 116.8, 52.1, 46.9; MS (EI, 70 eV)  $m/z$  438, 357, 121, 91, 77; HRMS (ESI)  $m/z$   $[\text{M} + \text{H}]^+$  calcd for  $\text{C}_{22}\text{H}_{18}\text{N}_2\text{OSBr}$  437.0318, found 437.0342.

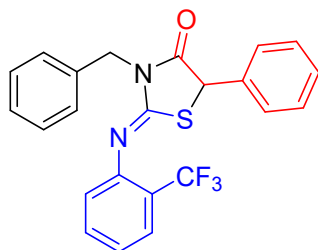

*(Z)*-3-Benzyl-5-phenyl-2-((2-(trifluoromethyl)phenyl)imino)thiazolidin-4-one (**4n**).

Eluent: petroleum ether/ethyl acetate (v/v = 8/1); yellow liquid in 62% yield (26.4 mg, 0.06 mmol); IR (KBr,  $\text{cm}^{-1}$ ) 3065, 3034, 2946, 1730, 1634, 1601, 1579, 1491, 1453, 1427, 1380, 1319, 1264, 1170, 1129, 1056, 1034, 977, 842, 760, 698;  $^1\text{H}$  NMR (400 MHz,  $\text{CDCl}_3$ , ppm)  $\delta$  7.80 (d,  $J = 7.9$  Hz, 1H), 7.68-7.65 (m, 2H), 7.56 (t,  $J = 7.8$  Hz, 1H), 7.48-7.39 (m, 8H), 7.29 (t,  $J = 7.6$  Hz, 1H), 7.16 (d,  $J = 8.0$  Hz, 1H), 5.29-5.15 (m, 3H);  $^{13}\text{C}\{^1\text{H}\}$  NMR (100 MHz,  $\text{CDCl}_3$ , ppm)  $\delta$  172.9, 154.8, 146.5, 135.9, 135.4, 132.8, 129.3, 129.1, 129.0, 128.6, 128.3, 128.1, 127.0 (q,  $J = 5.0$  Hz), 125.4, 123.0 (d,  $J = 284.0$  Hz), 122.5 (q,  $J = 30.0$  Hz), 119.9, 52.0, 46.9; MS (EI, 70 eV)  $m/z$  426, 308, 275, 121, 91, 77; HRMS (ESI)  $m/z$   $[\text{M} + \text{H}]^+$  calcd for  $\text{C}_{23}\text{H}_{18}\text{N}_2\text{OSF}_3$  427.1087, found 427.1107.

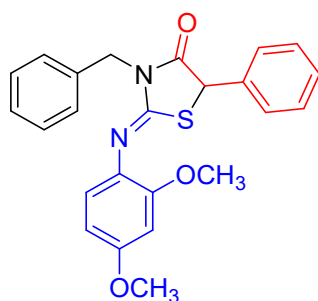

*(Z)*-3-Benzyl-2-((2,4-dimethoxyphenyl)imino)-5-phenylthiazolidin-4-one (**4o**).

Eluent: petroleum ether/ethyl acetate (v/v = 3/1); yellow liquid in 60% yield (25.1 mg, 0.06 mmol); IR (KBr,  $\text{cm}^{-1}$ ) 3063, 3031, 3002, 2937, 2835, 1723, 1636, 1584, 1504, 1454, 1381, 1330, 1208, 1165, 1126, 1080, 1033, 911, 824, 731, 699;  $^1\text{H}$  NMR (400 MHz,  $\text{CDCl}_3$ , ppm)  $\delta$  7.58 (d,  $J = 8.5$  Hz, 2H), 7.34-7.28 (m, 8H), 6.85 (d,  $J = 8.5$  Hz, 1H), 6.53 (d,  $J = 2.6$  Hz, 1H), 6.44 (dd,  $J = 8.5, 2.6$  Hz, 1H), 5.16-5.03 (m, 3H), 3.80 (s, 3H), 3.77 (s, 3H);  $^{13}\text{C}\{^1\text{H}\}$  NMR (100 MHz,  $\text{CDCl}_3$ , ppm)  $\delta$  173.0, 157.9, 153.9, 151.9, 136.2, 135.8, 130.6, 129.2, 129.1, 128.7, 128.5, 128.3, 127.9, 121.6, 104.1, 100.1, 55.9, 55.5, 51.8, 46.6. MS (EI, 70 eV)  $m/z$  418, 387, 269, 121, 91, 77; HRMS

(ESI)  $m/z$   $[M + H]^+$  calcd for  $C_{24}H_{23}N_2O_3S$  419.1424, found 419.1458.

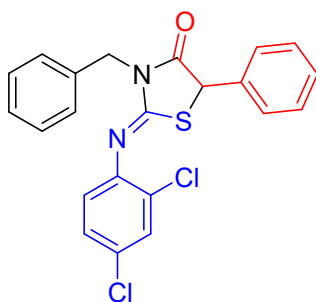

(*Z*)-3-Benzyl-2-((2,4-dichlorophenyl)imino)-5-phenylthiazolidin-4-one (**4p**). Eluent: petroleum ether/ethyl acetate (v/v = 8/1); white solid in 61% yield (26.0 mg, 0.06 mmol); mp 100-101 °C; IR (KBr,  $cm^{-1}$ ) 3063, 3032, 2927, 1730, 1632, 1555, 1471, 1454, 1428, 1378, 1331, 1164, 1100, 1080, 1056, 822, 783, 713, 698;  $^1H$  NMR (400 MHz,  $CDCl_3$ , ppm)  $\delta$  7.52 (d,  $J = 8.5$  Hz, 2H), 7.39-7.12 (m, 10H), 6.88 (d,  $J = 8.5$  Hz, 1H), 5.11-4.98 (m, 3H);  $^{13}C\{^1H\}$  NMR (100 MHz,  $CDCl_3$ , ppm)  $\delta$  172.8, 155.7, 144.0, 135.8, 135.2, 130.3, 130.1, 129.3, 129.2, 129.0, 128.7, 128.3, 128.2, 127.8, 127.6, 122.8, 52.1, 46.8; MS (EI, 70 eV)  $m/z$  426, 307, 121, 91, 77; HRMS (ESI)  $m/z$   $[M + H]^+$  calcd for  $C_{22}H_{17}N_2OSCl_2$  427.0433, found 427.0467.

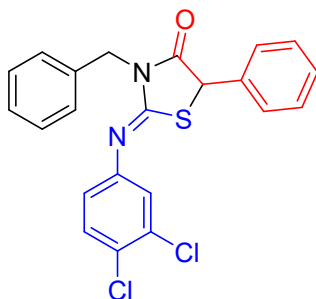

(*Z*)-3-Benzyl-2-((3,4-dichlorophenyl)imino)-5-phenylthiazolidin-4-one (**4q**). Eluent: petroleum ether/ethyl acetate (v/v = 8/1); white solid in 61% yield (26.0 mg, 0.06 mmol); mp 115-117 °C; IR (KBr,  $cm^{-1}$ ) 3088, 3064, 3032, 2947, 1727, 1629, 1584, 1495, 1468, 1378, 1332, 1264, 1165, 1125, 1079, 1027, 978, 876, 821, 735, 698;  $^1H$  NMR (400 MHz,  $CDCl_3$ , ppm)  $\delta$  7.46 (d,  $J = 8.6$  Hz, 2H), 7.34-7.09 (m, 10H), 6.82 (dt,  $J = 8.6, 2.1$  Hz, 1H), 5.10-4.94 (m, 3H);  $^{13}C\{^1H\}$  NMR (100 MHz,  $CDCl_3$ , ppm)  $\delta$  172.7, 154.4, 147.5, 135.9, 135.2, 133.0, 131.0, 129.3, 129.1, 129.0, 128.7, 128.3, 128.20, 128.17, 123.3, 121.0, 51.9, 46.8; MS (EI, 70 eV)  $m/z$  426, 357, 121, 91, 77; HRMS (ESI)  $m/z$   $[M + H]^+$  calcd for  $C_{22}H_{17}N_2OSCl_2$  427.0433, found 427.0454.

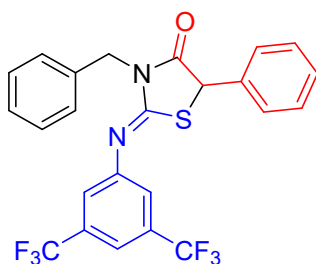

(*Z*)-3-Benzyl-2-((3,5-bis(trifluoromethyl)phenyl)imino)-5-phenylthiazolidin-4-one (**4r**). Eluent: petroleum ether/ethyl acetate (v/v = 8/1); yellow liquid in 77% yield (38.0 mg, 0.08 mmol); IR (KBr,  $\text{cm}^{-1}$ ) 3089, 3066, 3035, 2952, 1734, 1630, 1496, 1455, 1430, 1378, 1350, 1277, 1127, 1080, 981, 943, 890, 847, 722, 700;  $^1\text{H}$  NMR (400 MHz,  $\text{CDCl}_3$ , ppm)  $\delta$  7.64 (s, 1H), 7.50 (d,  $J = 8.0$  Hz, 2H), 7.45 (s, 2H), 7.38-7.28 (m, 8H), 5.20-5.01 (m, 3H);  $^{13}\text{C}\{^1\text{H}\}$  NMR (100 MHz,  $\text{CDCl}_3$ , ppm)  $\delta$  172.7, 155.7, 149.3, 135.6, 134.7, 132.7 (q,  $J = 33.0$  Hz), 129.3, 129.2, 129.0, 128.7, 128.3, 128.2, 124.6, 121.8 (q,  $J = 3.0$  Hz), 118.2 (q,  $J = 4.0$  Hz), 52.0, 46.8; MS (EI, 70 eV)  $m/z$  494, 376, 343, 272, 118, 91, 77; HRMS (ESI)  $m/z$   $[\text{M} + \text{H}]^+$  calcd for  $\text{C}_{24}\text{H}_{17}\text{N}_2\text{OSF}_6$  495.0960, found 495.0984.

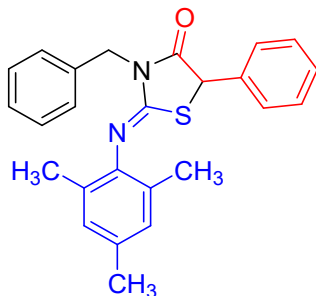

(*Z*)-3-Benzyl-2-(mesitylimino)-5-phenylthiazolidin-4-one (**4s**). Eluent: petroleum ether/ethyl acetate (v/v = 8/1); colorless liquid in 61% yield (24.4 mg, 0.06 mmol); IR (KBr,  $\text{cm}^{-1}$ ) 3087, 3064, 3031, 2943, 2916, 2856, 1725, 1642, 1606, 1494, 1478, 1454, 1427, 1379, 1330, 1266, 1226, 1174, 1140, 1079, 1030, 976, 855, 736, 718, 697;  $^1\text{H}$  NMR (400 MHz,  $\text{CDCl}_3$ , ppm)  $\delta$  7.51-7.48 (m, 2H), 7.31-7.24 (m, 8H), 6.82 (s, 2H), 5.15-5.01 (m, 3H), 2.22 (s, 3H), 1.99 (s, 6H);  $^{13}\text{C}\{^1\text{H}\}$  NMR (100 MHz,  $\text{CDCl}_3$ , ppm)  $\delta$  173.0, 152.7, 143.3, 136.2, 135.9, 133.6, 129.2, 129.02, 128.99, 128.8, 128.6, 128.1, 128.0, 51.9, 46.6, 20.9, 17.9; MS (EI, 70 eV)  $m/z$  400, 385, 269, 225, 91, 77; HRMS (ESI)  $m/z$   $[\text{M} + \text{H}]^+$  calcd for  $\text{C}_{25}\text{H}_{25}\text{N}_2\text{OS}$  401.1682, found 401.1712.

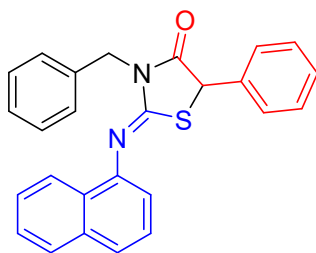

*(Z)*-3-Benzyl-2-(naphthalen-1-ylimino)-5-phenylthiazolidin-4-one (**4t**). Eluent: petroleum ether/ethyl acetate (v/v = 8/1); yellow liquid in 66% yield (26.9 mg, 0.07 mmol); IR (KBr,  $\text{cm}^{-1}$ ) 3057, 2945, 1726, 1642, 1577, 1498, 1452, 1427, 1378, 1333, 1264, 1186, 1150, 1079, 1014, 980, 859, 777, 738, 700;  $^1\text{H}$  NMR (400 MHz,  $\text{CDCl}_3$ , ppm)  $\delta$  7.78 (d,  $J = 8.2$  Hz, 1H), 7.65-7.54 (m, 4H), 7.46-7.26 (m, 11H), 7.06 (d,  $J = 7.3$  Hz, 1H), 5.24-5.10 (m, 3H);  $^{13}\text{C}\{^1\text{H}\}$  NMR (100 MHz,  $\text{CDCl}_3$ , ppm)  $\delta$  173.1, 153.2, 144.5, 136.3, 135.5, 134.4, 129.2, 129.0, 128.9, 128.8, 128.3, 128.1, 128.0, 127.7, 126.5, 125.73, 125.72, 125.0, 123.6, 115.1, 51.9, 47.0; MS (EI, 70 eV)  $m/z$  408, 331, 257, 121, 91, 77; HRMS (ESI)  $m/z$   $[\text{M} + \text{H}]^+$  calcd for  $\text{C}_{26}\text{H}_{21}\text{N}_2\text{OS}$  409.1369, found 409.1388.

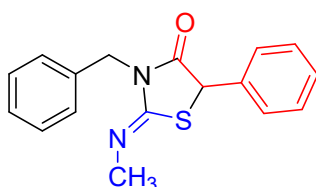

*(Z)*-3-Benzyl-2-(methylimino)-5-phenylthiazolidin-4-one (**4u**). Eluent: petroleum ether/ethyl acetate (v/v = 8/1); colorless liquid in 34% yield (10.1 mg, 0.03 mmol); IR (KBr,  $\text{cm}^{-1}$ ) 3061, 3029, 2945, 1722, 1640, 1494, 1451, 1419, 1363, 1303, 1177, 1104, 1026, 858, 777, 729, 697;  $^1\text{H}$  NMR (400 MHz,  $\text{CDCl}_3$ , ppm)  $\delta$  7.41-7.24 (m, 10H), 5.17 (s, 1H), 4.62-4.52 (m, 2H), 3.29 (s, 3H);  $^{13}\text{C}\{^1\text{H}\}$  NMR (100 MHz,  $\text{CDCl}_3$ , ppm)  $\delta$  172.8, 152.5, 139.2, 135.7, 129.1, 128.8, 128.5, 128.3, 127.6, 127.1, 55.6, 51.9, 30.0; MS (EI, 70 eV)  $m/z$  296, 205, 145, 118, 91, 77; HRMS (ESI)  $m/z$   $[\text{M} + \text{H}]^+$  calcd for  $\text{C}_{17}\text{H}_{17}\text{N}_2\text{OS}$  297.1056, found 297.1059.

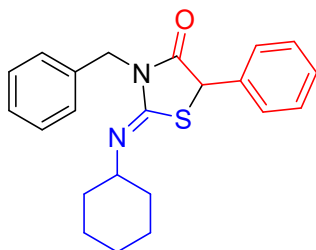

(*Z*)-3-Benzyl-2-(cyclohexylimino)-5-phenylthiazolidin-4-one (**4v**). Eluent: petroleum ether/ethyl acetate (v/v = 8/1); white solid in 47% yield (17.1 mg, 0.05 mmol); mp 90-92 °C; IR (KBr, cm<sup>-1</sup>) 3063, 3032, 2928, 2853, 1719, 1644, 1586, 1495, 1451, 1426, 1386, 1330, 1180, 1078, 1029, 977, 910, 860, 731, 698; <sup>1</sup>H NMR (400 MHz, CDCl<sub>3</sub>, ppm) δ 7.46 (d, *J* = 8.0 Hz, 2H), 7.33-7.22 (m, 8H), 5.07-4.85 (m, 3H), 3.21-3.15 (m, 1H), 1.78-1.72 (m, 4H), 1.61-1.29 (m, 6H); <sup>13</sup>C{<sup>1</sup>H} NMR (100 MHz, CDCl<sub>3</sub>, ppm) δ 172.7, 147.5, 136.6, 136.4, 129.2, 129.1, 128.7, 128.34, 128.27, 127.7, 61.2, 51.5, 46.3, 33.7, 33.6, 25.8, 24.5; MS (EI, 70 eV) *m/z* 364, 273, 245, 118, 91, 77; HRMS (ESI) *m/z* [M + H]<sup>+</sup> calcd for C<sub>22</sub>H<sub>25</sub>N<sub>2</sub>OS<sub>2</sub> 365.1682, found 365.1702.

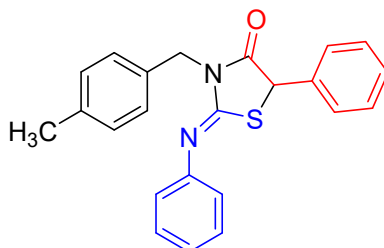

(*Z*)-3-(4-Methylbenzyl)-5-phenyl-2-(phenylimino)thiazolidin-4-one (**5a**). Eluent: petroleum ether/ethyl acetate (v/v = 8/1); yellow solid in 75% yield (27.9 mg, 0.08 mmol); mp 113-115 °C; IR (KBr, cm<sup>-1</sup>) 3058, 3030, 2946, 2923, 1724, 1634, 1593, 1515, 1489, 1452, 1425, 1379, 1331, 1156, 835, 770, 724, 695; <sup>1</sup>H NMR (400 MHz, CDCl<sub>3</sub>, ppm) δ 7.41 (d, *J* = 8.0 Hz, 2H), 7.33-7.25 (m, 7H), 7.12-7.08 (m, 3H), 7.00 (d, *J* = 8.0 Hz, 2H), 5.08-4.94 (m, 3H), 2.31 (s, 3H); <sup>13</sup>C{<sup>1</sup>H} NMR (100 MHz, CDCl<sub>3</sub>, ppm) δ 172.9, 152.8, 148.1, 137.7, 135.7, 133.2, 129.31, 129.26, 129.2, 129.1, 128.8, 128.3, 124.8, 121.2, 51.8, 46.4, 21.3; MS (EI, 70 eV) *m/z* 372, 284, 254, 105, 77; HRMS (ESI) *m/z* [M + H]<sup>+</sup> calcd for C<sub>23</sub>H<sub>21</sub>N<sub>2</sub>OS 373.1369, found 373.1387.

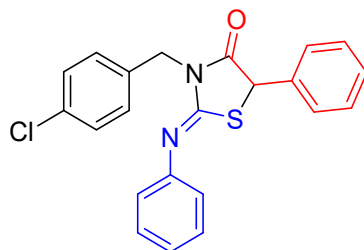

(*Z*)-3-(4-Chlorobenzyl)-5-phenyl-2-(phenylimino)thiazolidin-4-one (**5b**). Eluent: petroleum ether/ethyl acetate (v/v = 8/1); white solid in 54% yield (21.2 mg, 0.05 mmol); mp 124-126 °C; IR (KBr, cm<sup>-1</sup>) 3062, 3031, 2947, 1725, 1634, 1593, 1490, 1452, 1425, 1379, 1330, 1156, 1093, 1016, 980, 903, 803, 770, 724, 695; <sup>1</sup>H NMR (400 MHz, CDCl<sub>3</sub>, ppm) δ 7.45 (d, *J* = 8.0 Hz, 2H), 7.35-7.25 (m, 9H), 7.12 (t, *J* = 8.0 Hz, 1H), 6.99 (d, *J* = 8.0 Hz, 2H), 5.10-4.94 (m, 3H); <sup>13</sup>C{<sup>1</sup>H} NMR (100 MHz, CDCl<sub>3</sub>, ppm) δ 172.8, 152.6, 147.8, 135.4, 134.6, 133.9, 130.7, 129.4, 129.2, 128.9, 128.8, 128.2, 124.9, 121.1, 51.8, 45.9; MS (EI, 70 eV) *m/z* 392, 274, 257, 125, 77; HRMS (ESI) *m/z* [M + H]<sup>+</sup> calcd for C<sub>22</sub>H<sub>18</sub>N<sub>2</sub>OSCl 393.0823, found 393.0840.

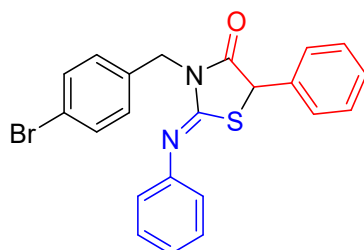

(*Z*)-3-(4-bromobenzyl)-5-phenyl-2-(phenylimino)thiazolidin-4-one (**5c**). Eluent: petroleum ether/ethyl acetate (v/v = 8/1); white solid in 66% yield (28.8 mg, 0.07 mmol); mp 116-118 °C; IR (KBr, cm<sup>-1</sup>) 3061, 3030, 2947, 1725, 1635, 1593, 1488, 1453, 1425, 1378, 1330, 1157, 1105, 1071, 1013, 903, 833, 799, 769, 725, 695; <sup>1</sup>H NMR (400 MHz, CDCl<sub>3</sub>, ppm) δ 7.41 (d, *J* = 8.3 Hz, 2H), 7.39-7.25 (m, 9H), 7.11 (t, *J* = 7.4 Hz, 1H), 6.98 (d, *J* = 8.3 Hz, 2H), 5.10-4.92 (m, 3H); <sup>13</sup>C{<sup>1</sup>H} NMR (100 MHz, CDCl<sub>3</sub>, ppm) δ 172.8, 152.6, 147.8, 135.4, 135.1, 131.7, 131.0, 129.4, 129.2, 128.9, 128.2, 124.9, 122.1, 121.1, 51.8, 46.0; MS (EI, 70 eV) *m/z* 438, 287, 136, 121, 77; HRMS (ESI) *m/z* [M + H]<sup>+</sup> calcd for C<sub>22</sub>H<sub>18</sub>N<sub>2</sub>OSBr 437.0318, found 437.0339.



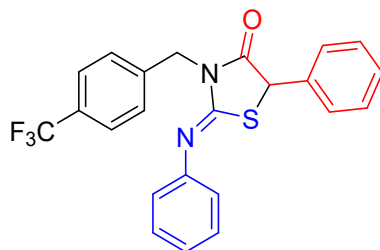

*(Z)*-5-phenyl-2-(phenylimino)-3-(4-(trifluoromethyl)benzyl)thiazolidin-4-one (**5d**).

Eluent: petroleum ether/ethyl acetate (v/v = 8/1); yellow solid in 53% yield (22.6 mg, 0.05 mmol); mp 116-118 °C; IR (KBr,  $\text{cm}^{-1}$ ) 3062, 3032, 2937, 1726, 1631, 1593, 1490, 1453, 1424, 1380, 1323, 1157, 1111, 1067, 1020, 982, 904, 818, 770, 725, 696;  $^1\text{H}$  NMR (400 MHz,  $\text{CDCl}_3$ , ppm)  $\delta$  7.60-7.55 (m, 4H), 7.34-7.26 (m, 7H), 7.11 (t,  $J$  = 8.2 Hz, 1H), 6.99 (d,  $J$  = 8.2 Hz, 2H), 5.13-5.01 (m, 3H);  $^{13}\text{C}\{^1\text{H}\}$  NMR (100 MHz,  $\text{CDCl}_3$ , ppm)  $\delta$  172.9, 152.5, 147.7, 140.0, 139.9 (d,  $J$  = 2.0 Hz), 135.3, 130.2 (q,  $J$  = 32.0 Hz), 129.4, 129.3, 129.2, 129.0, 128.2, 125.6 (q,  $J$  = 4.0 Hz), 125.0, 122.8, 121.1, 51.8, 46.1; MS (EI, 70 eV)  $m/z$  426, 338, 307, 159, 77; HRMS (ESI)  $m/z$   $[\text{M} + \text{H}]^+$  calcd for  $\text{C}_{23}\text{H}_{18}\text{N}_2\text{OSF}_3$  427.1087, found 427.1107.

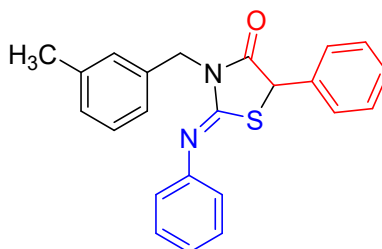

*(Z)*-3-(3-methylbenzyl)-5-phenyl-2-(phenylimino)thiazolidin-4-one (**5e**). Eluent: petroleum ether/ethyl acetate (v/v = 8/1); yellow liquid in 58% yield (21.6 mg, 0.06 mmol); IR (KBr,  $\text{cm}^{-1}$ ) 3060, 3030, 2947, 2866, 1727, 1633, 1490, 1452, 1425, 1375, 1266, 1152, 1096, 1073, 1026, 1002, 976, 910, 834, 770, 694;  $^1\text{H}$  NMR (400 MHz,  $\text{CDCl}_3$ , ppm)  $\delta$  7.31-7.17 (m, 10H), 7.08 (t,  $J$  = 8.3 Hz, 2H), 6.99 (d,  $J$  = 8.3 Hz, 2H), 5.08-4.94 (m, 3H), 2.30 (s, 3H);  $^{13}\text{C}\{^1\text{H}\}$  NMR (100 MHz,  $\text{CDCl}_3$ , ppm)  $\delta$  173.0, 152.8, 148.1, 138.2, 136.2, 135.7, 129.8, 129.4, 129.2, 128.9, 128.8, 128.6, 128.4, 126.1, 124.8, 121.3, 51.8, 46.7, 21.6; MS (EI, 70 eV)  $m/z$  372, 284, 254, 105, 77; HRMS (ESI)  $m/z$   $[\text{M} + \text{H}]^+$  calcd for  $\text{C}_{23}\text{H}_{21}\text{N}_2\text{OS}$  373.1369, found 373.1398.

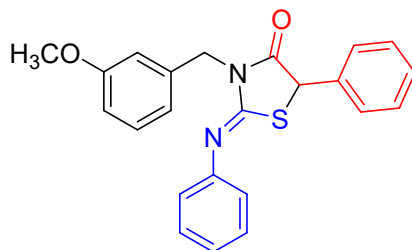

(*Z*)-3-(3-methoxybenzyl)-5-phenyl-2-(phenylimino)thiazolidin-4-one (**5f**). Eluent: petroleum ether/ethyl acetate (v/v = 5/1); yellow liquid in 71% yield (27.5 mg, 0.07 mmol); IR (KBr,  $\text{cm}^{-1}$ ) 3060, 3031, 3003, 2950, 2835, 1730, 1648, 1492, 1453, 1433, 1381, 1329, 1290, 1264, 1232, 1152, 1054, 985, 834, 770, 740, 696;  $^1\text{H}$  NMR (400 MHz,  $\text{CDCl}_3$ , ppm)  $\delta$  7.45-.32 (m, 8H), 7.24-7.12 (m, 5H), 6.95 (d,  $J = 8.1$  Hz, 1H), 5.23-5.09 (m, 3H), 3.85 (s, 3H);  $^{13}\text{C}\{^1\text{H}\}$  NMR (100 MHz,  $\text{CDCl}_3$ , ppm)  $\delta$  172.9, 159.8, 152.8, 148.0, 137.6, 135.7, 129.6, 129.4, 129.2, 128.8, 128.3, 124.8, 121.3, 121.2, 114.2, 113.9, 55.3, 51.7, 46.6; MS (EI, 70 eV)  $m/z$  388, 300, 270, 121, 77; MS (EI, 70 eV)  $m/z$  388, 300, 270, 121, 77; HRMS (ESI)  $m/z$   $[\text{M} + \text{H}]^+$  calcd for  $\text{C}_{23}\text{H}_{21}\text{N}_2\text{O}_2\text{S}$  389.1318, found 389.1338.

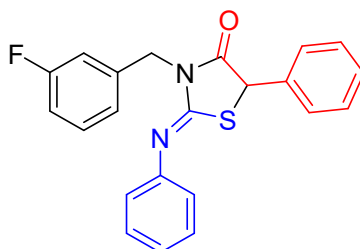

(*Z*)-3-(3-fluorobenzyl)-5-phenyl-2-(phenylimino)thiazolidin-4-one (**5g**). Eluent: petroleum ether/ethyl acetate (v/v = 8/1); yellow liquid in 54% yield (20.3 mg, 0.05 mmol); IR (KBr,  $\text{cm}^{-1}$ ) 3062, 3031, 2930, 1725, 1634, 1592, 1488, 1452, 1425, 1380, 1331, 1254, 1157, 1075, 987, 943, 834, 770, 749, 695;  $^1\text{H}$  NMR (400 MHz,  $\text{CDCl}_3$ , ppm)  $\delta$  7.35-7.22 (m, 10H), 7.12 (t,  $J = 8.0$  Hz, 1H), 7.00 (d,  $J = 8.0$  Hz, 3H), 5.13-4.98 (m, 3H);  $^{13}\text{C}\{^1\text{H}\}$  NMR (100 MHz,  $\text{CDCl}_3$ , ppm)  $\delta$  172.8, 162.8 (d,  $J = 245.0$  Hz), 152.6, 147.7, 138.4 (d,  $J = 7.0$  Hz), 135.4, 130.1 (d,  $J = 8.0$  Hz), 129.3, 129.2, 128.9, 128.2, 124.9, 124.6 (d,  $J = 3.0$  Hz), 121.1, 115.9 (d,  $J = 22.0$  Hz), 114.9 (d,  $J = 21.0$  Hz), 51.7, 46.1 (d,  $J = 2.0$  Hz); MS (EI, 70 eV)  $m/z$  376, 257, 225, 121, 109, 77; HRMS (ESI)  $m/z$   $[\text{M} + \text{H}]^+$  calcd for  $\text{C}_{22}\text{H}_{18}\text{N}_2\text{OSF}$  377.1118, found 377.1138.

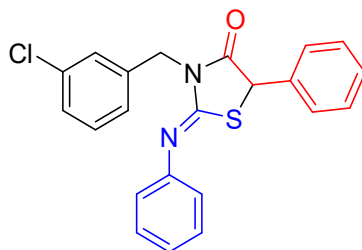

(*Z*)-3-(3-chlorobenzyl)-5-phenyl-2-(phenylimino)thiazolidin-4-one (**5h**). Eluent: petroleum ether/ethyl acetate (v/v = 8/1); yellow liquid in 50% yield (19.6 mg, 0.05 mmol); IR (KBr,  $\text{cm}^{-1}$ ) 3062, 3031, 2928, 2853, 1727, 1635, 1594, 1490, 1452, 1425, 1378, 1330, 1154, 1077, 1026, 982, 899, 833, 770, 726, 696;  $^1\text{H}$  NMR (400 MHz,  $\text{CDCl}_3$ , ppm)  $\delta$  7.52 (t,  $J = 1.9$  Hz, 1H), 7.39-7.22 (m, 10H), 7.15-7.11 (m, 1H), 7.02-6.99 (m, 2H), 5.14-4.96 (m, 3H);  $^{13}\text{C}\{^1\text{H}\}$  NMR (100 MHz,  $\text{CDCl}_3$ , ppm)  $\delta$  172.8, 152.5, 147.7, 137.9, 135.4, 134.4, 129.8, 129.3, 129.2, 129.1, 128.9, 128.20, 128.18, 127.2, 124.9, 121.1, 51.7, 46.0; MS (EI, 70 eV)  $m/z$  392, 274, 257, 125, 77; HRMS (ESI)  $m/z$   $[\text{M} + \text{H}]^+$  calcd for  $\text{C}_{22}\text{H}_{18}\text{N}_2\text{OSCl}$  393.0823, found 393.0843.

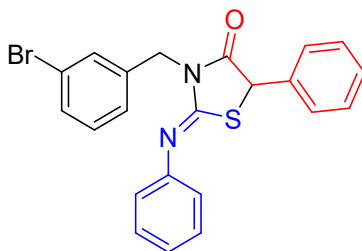

(*Z*)-3-(3-bromobenzyl)-5-phenyl-2-(phenylimino)thiazolidin-4-one (**5i**). Eluent: petroleum ether/ethyl acetate (v/v = 8/1); yellow liquid in 63% yield (27.5 mg, 0.06 mmol); IR (KBr,  $\text{cm}^{-1}$ ) 3061, 3030, 2943, 1725, 1631, 1591, 1486, 1426, 1378, 1330, 1156, 1072, 983, 900, 768, 698;  $^1\text{H}$  NMR (400 MHz,  $\text{CDCl}_3$ , ppm)  $\delta$  7.67 (s, 1H), 7.39 (t,  $J = 8.0$  Hz, 2H), 7.32-7.25 (m, 7H), 7.15-7.07 (m, 2H), 7.00 (d,  $J = 8.0$  Hz, 2H), 5.07-4.91 (m, 3H);  $^{13}\text{C}\{^1\text{H}\}$  NMR (100 MHz,  $\text{CDCl}_3$ , ppm)  $\delta$  172.8, 152.6, 147.8, 138.3, 135.5, 132.0, 131.2, 130.2, 129.4, 129.2, 129.0, 128.3, 127.7, 125.0, 122.6, 121.2, 51.8, 46.0; MS (EI, 70 eV)  $m/z$  438, 287, 136, 121, 77; HRMS (ESI)  $m/z$   $[\text{M} + \text{H}]^+$  calcd for  $\text{C}_{22}\text{H}_{18}\text{N}_2\text{OSBr}$  437.0318, found 437.0339.

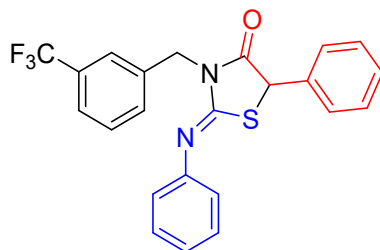

*(Z)*-5-phenyl-2-(phenylimino)-3-(3-(trifluoromethyl)benzyl)thiazolidin-4-one (**5j**).

Eluent: petroleum ether/ethyl acetate (v/v = 8/1); colorless liquid in 54% yield (23.0 mg, 0.05 mmol); IR (KBr,  $\text{cm}^{-1}$ ) 3063, 3031, 2948, 1726, 1635, 1593, 1490, 1453, 1427, 1380, 1326, 1163, 1125, 1074, 909, 834, 794, 770, 751, 724, 696;  $^1\text{H}$  NMR (400 MHz,  $\text{CDCl}_3$ , ppm)  $\delta$  7.81 (s, 1H), 7.66 (d,  $J = 7.7$  Hz, 1H), 7.54 (d,  $J = 7.9$  Hz, 1H), 7.42-7.25 (m, 8H), 7.13-6.98 (m, 3H), 5.15-5.02 (m, 3H);  $^{13}\text{C}\{^1\text{H}\}$  NMR (100 MHz,  $\text{CDCl}_3$ , ppm)  $\delta$  172.8, 152.6, 147.7, 137.0, 135.4, 132.5, 131.0 (q,  $J = 32.0$  Hz), 129.4, 129.2, 129.1, 129.0, 128.2, 125.8 (q,  $J = 3.0$  Hz), 125.0, 124.9 (q,  $J = 4.0$  Hz), 124.2 (q,  $J = 271.0$  Hz), 121.1, 51.8, 46.0; MS (EI, 70 eV)  $m/z$  426, 388, 307, 159, 77; HRMS (ESI)  $m/z$   $[\text{M} + \text{H}]^+$  calcd for  $\text{C}_{23}\text{H}_{18}\text{N}_2\text{OSF}_3$  427.1087, found 427.1106.

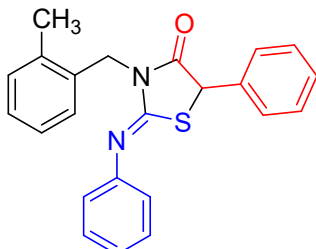

*(Z)*-3-(2-Methylbenzyl)-5-phenyl-2-(phenylimino)thiazolidin-4-one (**5k**). Eluent: petroleum ether/ethyl acetate (v/v = 8/1); yellow liquid in 45% yield (16.7 mg, 0.05 mmol); IR (KBr,  $\text{cm}^{-1}$ ) 3060, 3028, 2949, 1727, 1636, 1592, 1491, 1451, 1378, 1334, 1223, 1160, 1013, 901, 835, 769, 741, 696;  $^1\text{H}$  NMR (400 MHz,  $\text{CDCl}_3$ , ppm)  $\delta$  7.34-7.29 (m, 8H), 7.16-7.08 (m, 4H), 6.97 (d,  $J = 8.5$  Hz, 2H), 5.17-5.02 (m, 3H), 2.43 (s, 3H);  $^{13}\text{C}\{^1\text{H}\}$  NMR (100 MHz,  $\text{CDCl}_3$ , ppm)  $\delta$  173.0, 152.7, 147.9, 136.3, 135.5, 134.0, 130.5, 129.3, 129.2, 128.9, 128.3, 127.6, 127.2, 126.1, 124.8, 121.1, 51.8, 44.2, 19.6; MS (EI, 70 eV)  $m/z$  372, 284, 254, 105, 77; HRMS (ESI)  $m/z$   $[\text{M} + \text{H}]^+$  calcd for  $\text{C}_{23}\text{H}_{21}\text{N}_2\text{OS}$  373.1369, found 373.1385.

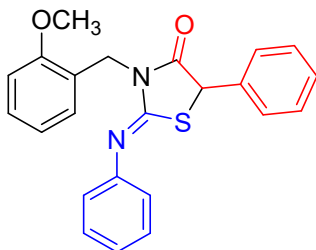

(*Z*)-3-(2-Methoxybenzyl)-5-phenyl-2-(phenylimino)thiazolidin-4-one (**5l**). Eluent: petroleum ether/ethyl acetate (v/v = 5/1); yellow liquid in 56% yield (21.7 mg, 0.06 mmol); IR (KBr,  $\text{cm}^{-1}$ ) 3060, 3030, 2946, 2838, 1727, 1634, 1592, 1492, 1458, 1379, 1338, 1245, 1161, 1114, 1027, 997, 900, 836, 755, 696;  $^1\text{H}$  NMR (400 MHz,  $\text{CDCl}_3$ , ppm)  $\delta$  7.35-7.26 (m, 7H), 7.21 (d,  $J = 7.7$  Hz, 2H), 7.07 (t,  $J = 7.7$  Hz, 1H), 6.96-6.81 (m, 4H), 5.19-5.05 (m, 3H), 3.73 (s, 3H);  $^{13}\text{C}\{^1\text{H}\}$  NMR (100 MHz,  $\text{CDCl}_3$ , ppm)  $\delta$  172.6, 157.3, 152.6, 148.1, 135.8, 129.2, 129.1, 128.8, 128.7, 128.3, 128.0, 124.7, 123.8, 121.2, 120.4, 110.5, 55.4, 51.8, 42.4; MS (EI, 70 eV)  $m/z$  388, 357, 269, 121, 77; HRMS (ESI)  $m/z$   $[\text{M} + \text{H}]^+$  calcd for  $\text{C}_{23}\text{H}_{21}\text{N}_2\text{O}_2\text{S}$  389.1318, found 389.1337.

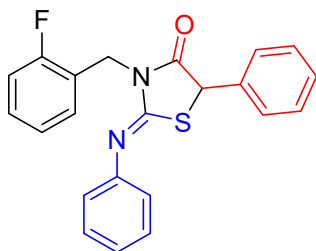

(*Z*)-3-(2-Fluorobenzyl)-5-phenyl-2-(phenylimino)thiazolidin-4-one (**5m**). Eluent: petroleum ether/ethyl acetate (v/v = 8/1); yellow liquid in 53% yield (19.9 mg, 0.05 mmol); IR (KBr,  $\text{cm}^{-1}$ ) 3062, 3031, 2933, 1729, 1624, 1593, 1492, 1455, 1426, 1383, 1233, 1160, 1104, 1074, 1027, 982, 904, 832, 756, 726, 695;  $^1\text{H}$  NMR (400 MHz,  $\text{CDCl}_3$ , ppm)  $\delta$  7.38-7.19 (m, 9H), 7.12-7.01 (m, 3H), 6.97 (d,  $J = 8.0$  Hz, 2H), 5.20-5.10 (m, 3H);  $^{13}\text{C}\{^1\text{H}\}$  NMR (100 MHz,  $\text{CDCl}_3$ , ppm)  $\delta$  172.6, 160.9 (d,  $J = 246.0$  Hz), 152.2, 147.8, 135.5, 129.8 (d,  $J = 3.0$  Hz), 129.5 (d,  $J = 8.0$  Hz), 129.3, 129.2, 128.9, 128.3, 124.8, 124.1 (d,  $J = 4.0$  Hz), 122.9 (d,  $J = 14.0$  Hz), 121.2, 115.6 (d,  $J = 22.0$  Hz), 51.7, 40.7 (d,  $J = 5.0$  Hz); MS (EI, 70 eV)  $m/z$  376, 288, 257, 109, 77; HRMS (ESI)  $m/z$   $[\text{M} + \text{H}]^+$  calcd for  $\text{C}_{22}\text{H}_{18}\text{N}_2\text{OSF}$  377.1118, found 377.1140.

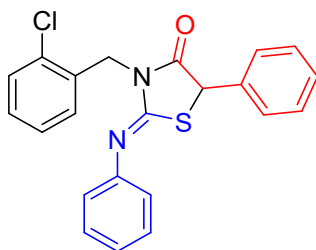

(*Z*)-3-(2-Chlorobenzyl)-5-phenyl-2-(phenylimino)thiazolidin-4-one (**5n**). Eluent: petroleum ether/ethyl acetate (v/v = 8/1); yellow liquid in 43% yield (16.9 mg, 0.04 mmol); IR (KBr,  $\text{cm}^{-1}$ ) 3062, 3029, 2936, 1728, 1631, 1590, 1486, 1446, 1414, 1380, 1338, 1160, 1049, 992, 903, 835, 754, 696;  $^1\text{H}$  NMR (400 MHz,  $\text{CDCl}_3$ , ppm)  $\delta$  7.38-7.28 (m, 8H), 7.23-7.14 (m, 3H), 7.09 (t,  $J = 8.0$  Hz, 1H), 6.96 (d,  $J = 8.0$  Hz, 2H), 5.25-5.15 (m, 3H);  $^{13}\text{C}\{^1\text{H}\}$  NMR (100 MHz,  $\text{CDCl}_3$ , ppm)  $\delta$  172.7, 152.2, 147.7, 135.3, 133.2, 133.1, 129.8, 129.3, 129.2, 129.0, 128.8, 128.3, 127.9, 126.9, 124.9, 121.2, 51.8, 44.5; MS (EI, 70 eV)  $m/z$  392, 274, 257, 125, 77; HRMS (ESI)  $m/z$   $[\text{M} + \text{H}]^+$  calcd for  $\text{C}_{22}\text{H}_{18}\text{N}_2\text{OSCl}$  393.0823, found 393.0843.

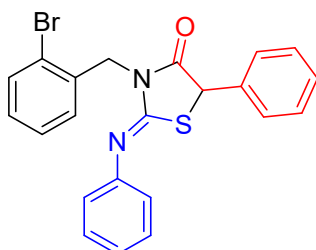

(*Z*)-3-(2-Bromobenzyl)-5-phenyl-2-(phenylimino)thiazolidin-4-one (**5o**). Eluent: petroleum ether/ethyl acetate (v/v = 8/1); yellow liquid in 57% yield (24.9 mg, 0.06 mmol); IR (KBr,  $\text{cm}^{-1}$ ) 3061, 3029, 2930, 1728, 1629, 1590, 1488, 1445, 1412, 1380, 1337, 1272, 1233, 1159, 1073, 992, 903, 835, 746, 696;  $^1\text{H}$  NMR (400 MHz,  $\text{CDCl}_3$ , ppm)  $\delta$  7.54 (d,  $J = 8.0$  Hz, 1H), 7.40-7.24 (m, 8H), 7.19-7.08 (m, 3H), 6.97 (d,  $J = 7.9$  Hz, 2H), 5.22-5.13 (m, 3H);  $^{13}\text{C}\{^1\text{H}\}$  NMR (100 MHz,  $\text{CDCl}_3$ , ppm)  $\delta$  172.6, 152.1, 147.6, 135.3, 134.7, 133.1, 129.3, 129.2, 128.94, 128.92, 128.3, 127.49, 127.47, 124.9, 123.0, 121.2, 51.8, 47.0; MS (EI, 70 eV)  $m/z$  438, 287, 136, 121, 77; HRMS (ESI)  $m/z$   $[\text{M} + \text{H}]^+$  calcd for  $\text{C}_{22}\text{H}_{18}\text{N}_2\text{OSBr}$  437.0318, found 437.0342.

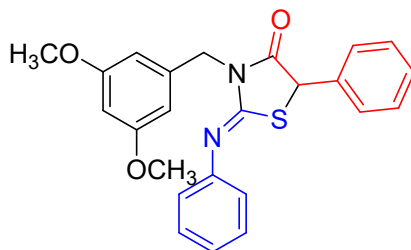

*(Z)*-3-(3,5-Dimethoxybenzyl)-5-phenyl-2-(phenylimino)thiazolidin-4-one (**5p**).

Eluent: petroleum ether/ethyl acetate (v/v = 3/1); yellow liquid in 63% yield (26.3 mg, 0.06 mmol); IR (KBr,  $\text{cm}^{-1}$ ) 3060, 3030, 3002, 2938, 2838, 1726, 1630, 1455, 1430, 1379, 1329, 1296, 1228, 1205, 1151, 1070, 989, 929, 833, 771, 728, 696;  $^1\text{H}$  NMR (400 MHz,  $\text{CDCl}_3$ , ppm)  $\delta$  7.33-7.26 (m, 7H), 7.11-6.98 (m, 3H), 6.67 (d,  $J = 2.3$  Hz, 2H), 6.39 (t,  $J = 2.3$  Hz, 1H), 5.09-4.92 (m, 3H), 3.70 (s, 6H);  $^{13}\text{C}\{^1\text{H}\}$  NMR (100 MHz,  $\text{CDCl}_3$ , ppm)  $\delta$  172.9, 161.0, 152.8, 148.0, 138.3, 135.7, 129.3, 129.1, 128.8, 128.3, 124.8, 121.2, 106.7, 100.3, 55.4, 51.7, 46.7; MS (EI, 70 eV)  $m/z$  418, 300, 268, 121, 91, 77; HRMS (ESI)  $m/z$   $[\text{M} + \text{H}]^+$  calcd for  $\text{C}_{24}\text{H}_{23}\text{N}_2\text{O}_3\text{S}$  419.1424, found 419.1458.

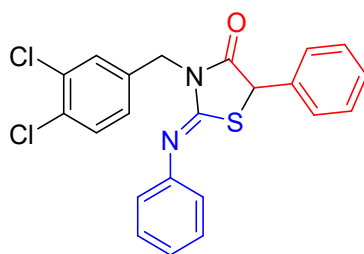

*(Z)*-3-(3,4-Dichlorobenzyl)-5-phenyl-2-(phenylimino)thiazolidin-4-one (**5q**). Eluent: petroleum ether/ethyl acetate (v/v = 8/1); yellow liquid in 57% yield (24.3 mg, 0.06 mmol); IR (KBr,  $\text{cm}^{-1}$ ) 3062, 3031, 2948, 1723, 1635, 1593, 1489, 1471, 1453, 1424, 1377, 1329, 1206, 1157, 1074, 1032, 983, 906, 823, 770, 730, 695;  $^1\text{H}$  NMR (400 MHz,  $\text{CDCl}_3$ , ppm)  $\delta$  7.62 (d,  $J = 1.9$  Hz, 1H), 7.36-7.26 (m, 9H), 7.11 (t,  $J = 7.9$  Hz, 1H), 7.00 (d,  $J = 7.9$  Hz, 2H), 5.11-4.90 (m, 3H);  $^{13}\text{C}\{^1\text{H}\}$  NMR (100 MHz,  $\text{CDCl}_3$ , ppm)  $\delta$  172.8, 152.5, 147.6, 136.2, 135.3, 132.6, 132.2, 131.1, 130.6, 129.4, 129.2, 129.0, 128.6, 128.2, 125.0, 121.2, 51.8, 45.4; MS (EI, 70 eV)  $m/z$  426, 308, 275, 159, 77; HRMS (ESI)  $m/z$   $[\text{M} + \text{H}]^+$  calcd for  $\text{C}_{22}\text{H}_{17}\text{N}_2\text{O}\text{SCl}_2$  427.0433, found 427.0455.

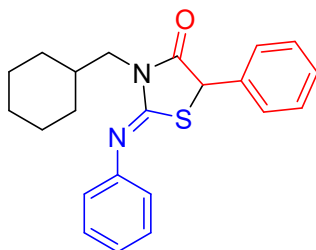

*(Z)*-3-(Cyclohexylmethyl)-5-phenyl-2-(phenylimino)thiazolidin-4-one (**5r**). Eluent: petroleum ether/ethyl acetate (v/v = 8/1); white solid in 46% yield (16.7 mg, 0.05 mmol); mp 133-135 °C; IR (KBr, cm<sup>-1</sup>) 3061, 3031, 2924, 2851, 1727, 1639, 1593, 1491, 1450, 1427, 1387, 1342, 1172, 1132, 1074, 1026, 956, 908, 833, 769, 725, 695; <sup>1</sup>H NMR (400 MHz, CDCl<sub>3</sub>, ppm) δ 7.45-7.19 (m, 8H), 7.11 (d, *J* = 7.8 Hz, 2H), 5.19 (s, 1H), 3.87 (d, *J* = 7.4 Hz, 2H), 2.12-1.74 (m, 6H), 1.38-1.11 (m, 5H); <sup>13</sup>C{<sup>1</sup>H} NMR (100 MHz, CDCl<sub>3</sub>, ppm) δ 173.2, 153.5, 148.3, 135.8, 129.3, 129.1, 128.8, 128.3, 124.7, 121.1, 51.7, 49.3, 36.0, 30.80, 30.74, 26.4, 25.84, 25.82; MS (EI, 70 eV) *m/z* 364, 281, 269, 118, 77; HRMS (ESI) *m/z* [M + H]<sup>+</sup> calcd for C<sub>22</sub>H<sub>25</sub>N<sub>2</sub>OS 365.1682, found 365.1702.

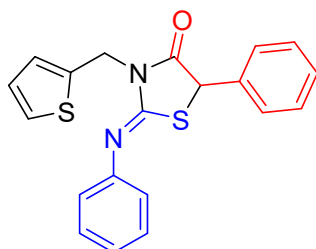

*(Z)*-5-Phenyl-2-(phenylimino)-3-(thiophen-2-ylmethyl)thiazolidin-4-one (**5s**). Eluent: petroleum ether/ethyl acetate (v/v = 8/1); white solid in 63% yield (22.9 mg, 0.06 mmol); mp 109-111 °C; IR (KBr, cm<sup>-1</sup>) 3062, 3030, 2946, 1725, 1634, 1592, 1489, 1452, 1420, 1382, 1325, 1184, 1139, 1074, 1025, 976, 904, 831, 770, 696; <sup>1</sup>H NMR (400 MHz, CDCl<sub>3</sub>, ppm) δ 7.33-7.30 (m, 2H), 7.28-7.17 (m, 7H), 7.12-7.05 (m, 3H), 6.90 (dd, *J* = 5.1, 3.5 Hz, 1H), 5.23-5.13 (m, 2H), 5.03 (s, 1H); <sup>13</sup>C{<sup>1</sup>H} NMR (100 MHz, CDCl<sub>3</sub>, ppm) δ 172.3, 152.3, 147.9, 137.4, 135.5, 129.4, 129.2, 128.9, 128.6, 128.3, 126.7, 126.3, 124.9, 121.3, 51.9, 41.1; MS (EI, 70 eV) *m/z* 364, 269, 246, 97, 77; HRMS (ESI) *m/z* [M + H]<sup>+</sup> calcd for C<sub>20</sub>H<sub>17</sub>N<sub>2</sub>OS<sub>2</sub> 365.0777, found 365.0796.



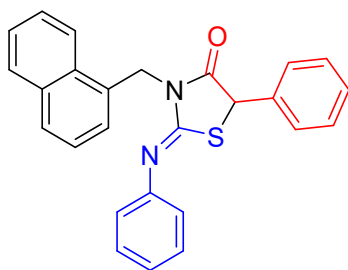

*(Z)*-3-(Naphthalen-1-ylmethyl)-5-phenyl-2-(phenylimino)thiazolidin-4-one (**5t**).

Eluent: petroleum ether/ethyl acetate (v/v = 8/1); yellow liquid in 38% yield (15.5 mg, 0.04 mmol); IR (KBr,  $\text{cm}^{-1}$ ) 3059, 2950, 1730, 1634, 1593, 1489, 1452, 1433, 1419, 1375, 1350, 1317, 1237, 1212, 1157, 1017, 834, 772, 728, 696;  $^1\text{H}$  NMR (400 MHz,  $\text{CDCl}_3$ , ppm)  $\delta$  8.36 (d,  $J = 8.1$  Hz, 1H), 7.86 (d,  $J = 7.9$  Hz, 1H), 7.80 (d,  $J = 8.2$  Hz, 1H), 7.60 (d,  $J = 7.1$  Hz, 1H), 7.54-7.30 (m, 10H), 7.11 (t,  $J = 7.4$  Hz, 1H), 6.97 (d,  $J = 8.2$  Hz, 2H), 5.64-5.48 (m, 2H), 5.20 (d,  $J = 30.8$  Hz, 1H);  $^{13}\text{C}\{^1\text{H}\}$  NMR (100 MHz,  $\text{CDCl}_3$ , ppm)  $\delta$  173.0, 152.7, 147.8, 135.5, 133.9, 131.5, 131.0, 129.3, 129.1, 128.9, 128.8, 128.5, 128.3, 126.9, 126.4, 125.8, 125.2, 124.8, 123.9, 121.1, 51.7, 44.6; MS (EI, 70 eV)  $m/z$  408, 372, 257, 141, 115, 77; HRMS (ESI)  $m/z$   $[\text{M} + \text{H}]^+$  calcd for  $\text{C}_{26}\text{H}_{21}\text{N}_2\text{OS}$  409.1369, found 409.1386.

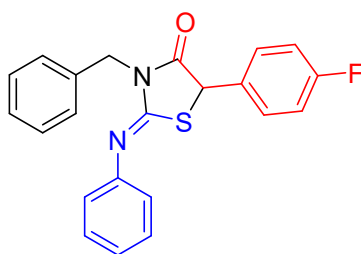

*(Z)*-3-Benzyl-5-(4-fluorophenyl)-2-(phenylimino)thiazolidin-4-one (**6a**). Eluent: petroleum ether/ethyl acetate (v/v = 8/1); white solid in 68% yield (25.6 mg, 0.07 mmol); mp 108-110  $^{\circ}\text{C}$ ; IR (KBr,  $\text{cm}^{-1}$ ) 3063, 3033, 2948, 1724, 1634, 1592, 1509, 1489, 1426, 1380, 1331, 1231, 1159, 1079, 1015, 975, 848, 770, 755, 697;  $^1\text{H}$  NMR (400 MHz,  $\text{CDCl}_3$ , ppm)  $\delta$  7.49 (d,  $J = 7.9$  Hz, 2H), 7.32-7.18 (m, 7H), 7.10-6.92 (m, 5H), 5.12-4.96 (m, 3H);  $^{13}\text{C}\{^1\text{H}\}$  NMR (100 MHz,  $\text{CDCl}_3$ , ppm)  $\delta$  172.7, 162.9 (d,  $J = 247.0$  Hz), 152.5, 148.0, 136.2, 131.4, 130.2 (d,  $J = 8.0$  Hz), 129.4, 129.1, 128.7, 128.1, 124.9, 121.2, 116.2 (d,  $J = 22.0$  Hz), 51.0, 46.7; MS (EI, 70 eV)  $m/z$  376, 258, 225, 121, 91, 77; HRMS (ESI)  $m/z$   $[\text{M} + \text{H}]^+$  calcd for  $\text{C}_{22}\text{H}_{18}\text{N}_2\text{OSF}$  377.1118, found

377.1138.

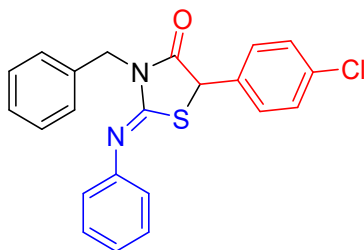

(*Z*)-3-Benzyl-5-(4-chlorophenyl)-2-(phenylimino)thiazolidin-4-one (**6b**). Eluent: petroleum ether/ethyl acetate (v/v = 8/1); white solid in 71% yield (27.8 mg, 0.07 mmol); mp 118-119 °C; IR (KBr, cm<sup>-1</sup>) 3062, 3032, 2947, 1724, 1634, 1593, 1490, 1454, 1427, 1381, 1331, 1153, 1091, 1015, 975, 840, 769, 755, 697; <sup>1</sup>H NMR (400 MHz, CDCl<sub>3</sub>, ppm) δ 7.49 (d, *J* = 8.0 Hz, 2H), 7.34-7.25 (m, 7H), 7.18 (d, *J* = 8.0 Hz, 2H), 7.11 (t, *J* = 8.0 Hz, 1H), 6.99 (d, *J* = 8.0 Hz, 2H), 5.10-4.97 (m, 3H); <sup>13</sup>C{<sup>1</sup>H} NMR (100 MHz, CDCl<sub>3</sub>, ppm) δ 172.5, 152.3, 147.8, 136.0, 134.8, 134.0, 129.7, 129.4, 129.3, 129.1, 128.6, 128.1, 124.9, 121.1, 51.0, 46.7; MS (EI, 70 eV) *m/z* 392, 240, 155, 91, 77; HRMS (ESI) *m/z* [M + H]<sup>+</sup> calcd for C<sub>22</sub>H<sub>18</sub>N<sub>2</sub>OSCl 393.0823, found 393.0844.

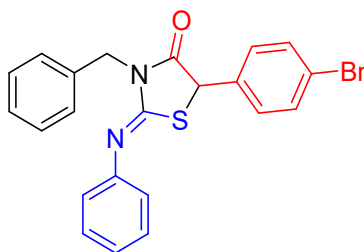

(*Z*)-3-Benzyl-5-(4-bromophenyl)-2-(phenylimino)thiazolidin-4-one (**6c**). Eluent: petroleum ether/ethyl acetate (v/v = 8/1); white solid in 73% yield (31.8 mg, 0.07 mmol); mp 119-121 °C; IR (KBr, cm<sup>-1</sup>) 3061, 3032, 2942, 1725, 1629, 1589, 1488, 1425, 1380, 1331, 1155, 1074, 1010, 976, 836, 763, 698; <sup>1</sup>H NMR (400 MHz, CDCl<sub>3</sub>, ppm) δ 7.49 (d, *J* = 8.0 Hz, 2H), 7.36 (d, *J* = 8.0 Hz, 2H), 7.32-7.24 (m, 5H), 7.09 (t, *J* = 8.0 Hz, 3H), 6.99 (d, *J* = 8.0 Hz, 2H), 5.08-4.95 (m, 3H); <sup>13</sup>C{<sup>1</sup>H} NMR (100 MHz, CDCl<sub>3</sub>, ppm) δ 172.4, 152.3, 147.9, 136.1, 134.6, 132.3, 130.0, 129.5, 129.1, 128.7, 128.2, 125.0, 123.0, 121.2, 51.1, 46.8; MS (EI, 70 eV) *m/z* 438, 273, 240, 91, 77; HRMS (ESI) *m/z* [M + H]<sup>+</sup> calcd for C<sub>22</sub>H<sub>18</sub>N<sub>2</sub>OSBr 437.0318, found 437.0338.

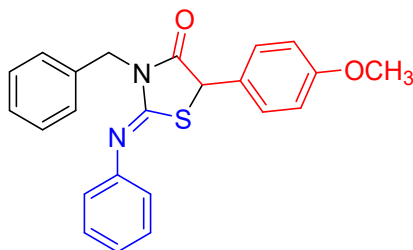

*(Z)*-3-Benzyl-5-(4-methoxyphenyl)-2-(phenylimino)thiazolidin-4-one (**6d**). Eluent: petroleum ether/ethyl acetate (v/v = 5/1); white solid in 52% yield (20.2 mg, 0.05 mmol); mp 113-115 °C; IR (KBr,  $\text{cm}^{-1}$ ) 3061, 3032, 2934, 2837, 1724, 1641, 1590, 1512, 1490, 1456, 1424, 1379, 1332, 1255, 1175, 1077, 1030, 842, 769, 698;  $^1\text{H}$  NMR (400 MHz,  $\text{CDCl}_3$ , ppm)  $\delta$  7.51 (d,  $J = 8.0$  Hz, 2H), 7.33-7.08 (m, 8H), 6.99 (d,  $J = 8.0$  Hz, 2H), 6.83 (d,  $J = 8.0$  Hz, 2H), 5.12-4.99 (m, 3H), 3.73 (s, 3H);  $^{13}\text{C}\{^1\text{H}\}$  NMR (100 MHz,  $\text{CDCl}_3$ , ppm)  $\delta$  173.2, 160.0, 152.8, 148.0, 136.2, 129.5, 129.3, 129.1, 128.6, 128.0, 127.5, 124.7, 121.2, 114.6, 55.4, 51.3, 46.6; MS (EI, 70 eV)  $m/z$  388, 240, 148, 91, 77; HRMS (ESI)  $m/z$   $[\text{M} + \text{H}]^+$  calcd for  $\text{C}_{23}\text{H}_{21}\text{N}_2\text{O}_2\text{S}$  389.1318, found 389.1338.

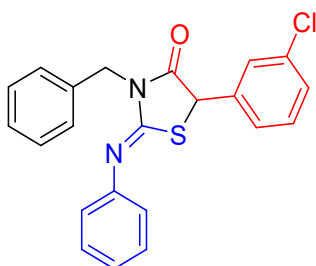

*(Z)*-3-Benzyl-5-(3-chlorophenyl)-2-(phenylimino)thiazolidin-4-one (**6e**). Eluent: petroleum ether/ethyl acetate (v/v = 8/1); yellow liquid in 55% yield (21.6 mg, 0.06 mmol); IR (KBr,  $\text{cm}^{-1}$ ) 3062, 3032, 2946, 1724, 1637, 1593, 1489, 1477, 1454, 1428, 1381, 1331, 1153, 1079, 1027, 975, 899, 756, 697;  $^1\text{H}$  NMR (400 MHz,  $\text{CDCl}_3$ , ppm)  $\delta$  7.51 (d,  $J = 8.0$  Hz, 2H), 7.35-7.10 (m, 10H), 7.00 (d,  $J = 8.0$  Hz, 2H), 5.12-4.99 (m, 3H);  $^{13}\text{C}\{^1\text{H}\}$  NMR (100 MHz,  $\text{CDCl}_3$ , ppm)  $\delta$  172.3, 152.1, 147.8, 137.4, 136.0, 135.0, 130.4, 129.4, 129.1, 128.6, 128.4, 128.1, 126.6, 124.9, 121.1, 51.1, 46.8; MS (EI, 70 eV)  $m/z$  392, 240, 207, 91, 77; HRMS (ESI)  $m/z$   $[\text{M} + \text{H}]^+$  calcd for  $\text{C}_{22}\text{H}_{18}\text{N}_2\text{O}\text{SCl}$  393.0823, found 393.0842.

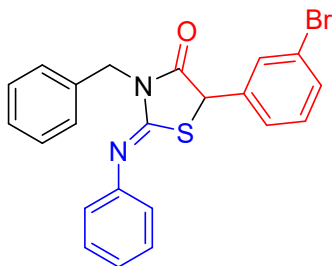

*(Z)*-3-Benzyl-5-(3-bromophenyl)-2-(phenylimino)thiazolidin-4-one (**6f**). Eluent: petroleum ether/ethyl acetate (v/v = 8/1); yellow liquid in 46% yield (20.1 mg, 0.04 mmol); IR (KBr,  $\text{cm}^{-1}$ ) 3061, 3032, 2943, 1725, 1632, 1590, 1488, 1424, 1381, 1332, 1156, 1075, 1027, 976, 889, 757, 696;  $^1\text{H}$  NMR (400 MHz,  $\text{CDCl}_3$ , ppm)  $\delta$  7.50 (d,  $J = 7.7$  Hz, 2H), 7.43-7.40 (m, 2H), 7.34-7.27 (m, 5H), 7.21-7.10 (m, 3H), 7.00 (d,  $J = 8.3$  Hz, 2H), 5.11-4.98 (m, 3H);  $^{13}\text{C}\{^1\text{H}\}$  NMR (100 MHz,  $\text{CDCl}_3$ , ppm)  $\delta$  172.3, 152.1, 147.8, 137.7, 136.0, 132.0, 131.3, 130.6, 129.4, 129.1, 128.7, 128.1, 127.0, 124.9, 123.1, 121.1, 51.0, 46.8; MS (EI, 70 eV)  $m/z$  438, 273, 240, 91, 77; HRMS (ESI)  $m/z$   $[\text{M} + \text{H}]^+$  calcd for  $\text{C}_{22}\text{H}_{18}\text{N}_2\text{OSBr}$  437.0318, found 437.0340.

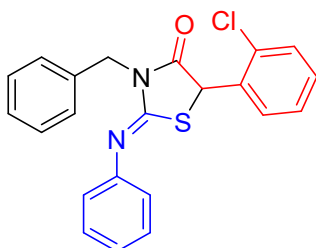

*(Z)*-3-Benzyl-5-(2-chlorophenyl)-2-(phenylimino)thiazolidin-4-one (**6g**). Eluent: petroleum ether/ethyl acetate (v/v = 8/1); yellow liquid in 41% yield (16.1 mg, 0.04 mmol); IR (KBr,  $\text{cm}^{-1}$ ) 3062, 3032, 2941, 1725, 1635, 1590, 1486, 1426, 1383, 1332, 1156, 1077, 1042, 977, 837, 748, 698;  $^1\text{H}$  NMR (400 MHz,  $\text{CDCl}_3$ , ppm)  $\delta$  7.57 (d,  $J = 8.0$  Hz, 2H), 7.35-7.28 (m, 6H), 7.18-7.07 (m, 4H), 6.97 (d,  $J = 7.8$  Hz, 2H), 5.53 (s, 1H), 5.11 (s, 2H);  $^{13}\text{C}\{^1\text{H}\}$  NMR (100 MHz,  $\text{CDCl}_3$ , ppm)  $\delta$  172.2, 152.9, 147.9, 136.0, 134.4, 133.9, 130.2, 130.1, 129.8, 129.4, 128.6, 128.1, 127.7, 124.8, 121.2, 49.4, 46.8; MS (EI, 70 eV)  $m/z$  392, 240, 207, 148, 97, 77; HRMS (ESI)  $m/z$   $[\text{M} + \text{H}]^+$  calcd for  $\text{C}_{22}\text{H}_{18}\text{N}_2\text{OSCl}$  393.0823, found 393.0843.

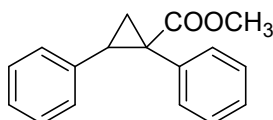

*Methyl 1,2-diphenylcyclopropane-1-carboxylate (8)*.<sup>4</sup> Eluent: petroleum ether/ethyl acetate (v/v = 7/1); white solid in 35% yield (8.8 mg, 0.04mmol); <sup>1</sup>H NMR (400 MHz, CDCl<sub>3</sub>, ppm) δ 7.41-7.24 (m, 10H), 5.17 (s, 1H), 4.57 (q, *J* = 8.0 Hz, 2H), 3.29 (s, 3H); <sup>13</sup>C{<sup>1</sup>H} NMR (100 MHz, CDCl<sub>3</sub>, ppm) δ 172.8, 152.5, 139.3, 135.7, 129.1, 128.9, 128.5, 128.3, 127.6, 127.1, 55.6, 51.9, 30.0. MS (EI, 70 eV) *m/z* 252, 220, 191, 178, 165, 121, 115, 91, 77.

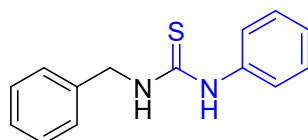

*1-Benzyl-3-phenylthiourea (9)*.<sup>5</sup> <sup>1</sup>H NMR (400 MHz, DMSO-*d*<sub>6</sub>, ppm) δ 9.64 (s, 1H), 8.17 (s, 1H), 7.44 (d, *J* = 7.4 Hz, 2H), 7.35-7.30 (m, 6H), 7.27-7.23 (m, 1H), 7.11 (t, *J* = 8.1 Hz, 1H), 4.75 (d, *J* = 5.7 Hz, 2H); <sup>13</sup>C{<sup>1</sup>H} NMR (100 MHz, DMSO-*d*<sub>6</sub>, ppm) δ 181.3, 139.6, 139.5, 129.1, 128.8, 127.9, 127.4, 124.8, 123.8, 47.7;

## References:

- (1) H. M. L. Davies, T. Hansen, M. R. Churchill, Catalytic asymmetric C-H activation of alkanes and tetrahydrofuran, *J. Am. Chem. Soc.*, 2000, **122**, 3063–3070.
- (2) H. Keipour, T. Ollevier, Iron-catalyzed carbene insertion reactions of α-diazoesters into SiH bonds, *Org. Lett.* 2017, **19**, 5736-5739.
- (3) B. Muriel, J. Waser, Azide radical initiated ring opening of cyclopropenes Leading to alkenyl nitriles and polycyclic aromatic compounds, *Angew. Chem. Int. Ed.*, 2021, **60**, 4075-4079.
- (4) T. Xiao, M. Mei, Y. He, L. Zhou, Blue light-promoted cross-coupling of aryldiazoacetates and diazocarbonyl compounds, *Chem. Commun.*, 2018, **54**, 8865–8868.
- (5) M. Zhao, Y. Guo, Q. Wang, L. Liu, S. Zhang, W. Guo, L.-P. Wu, F. G. Qiu, Synthesis of 2-iminothiazolidin-4-ones via copper-catalyzed [2 + 1 + 2] tandem annulation, *RSC Adv.*, 2023, **13**, 2220-2224.

## 8. NMR Spectra

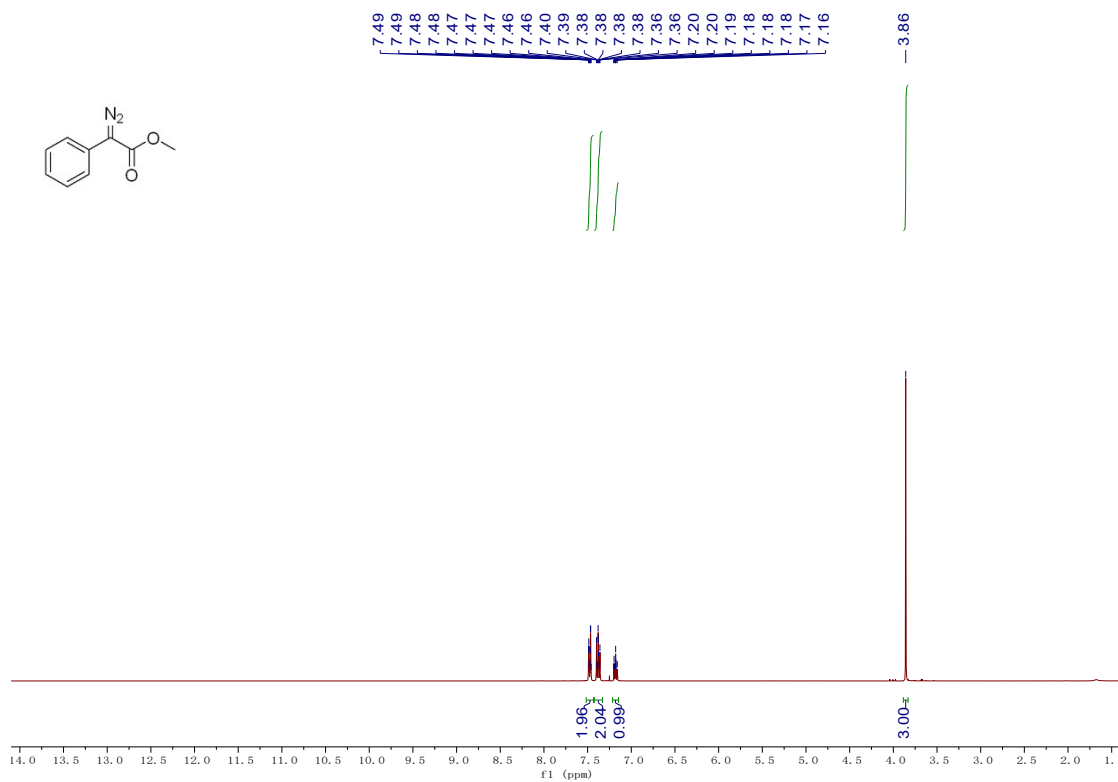

$^1\text{H NMR}$  of 3a in  $\text{CDCl}_3$  (400 MHz)

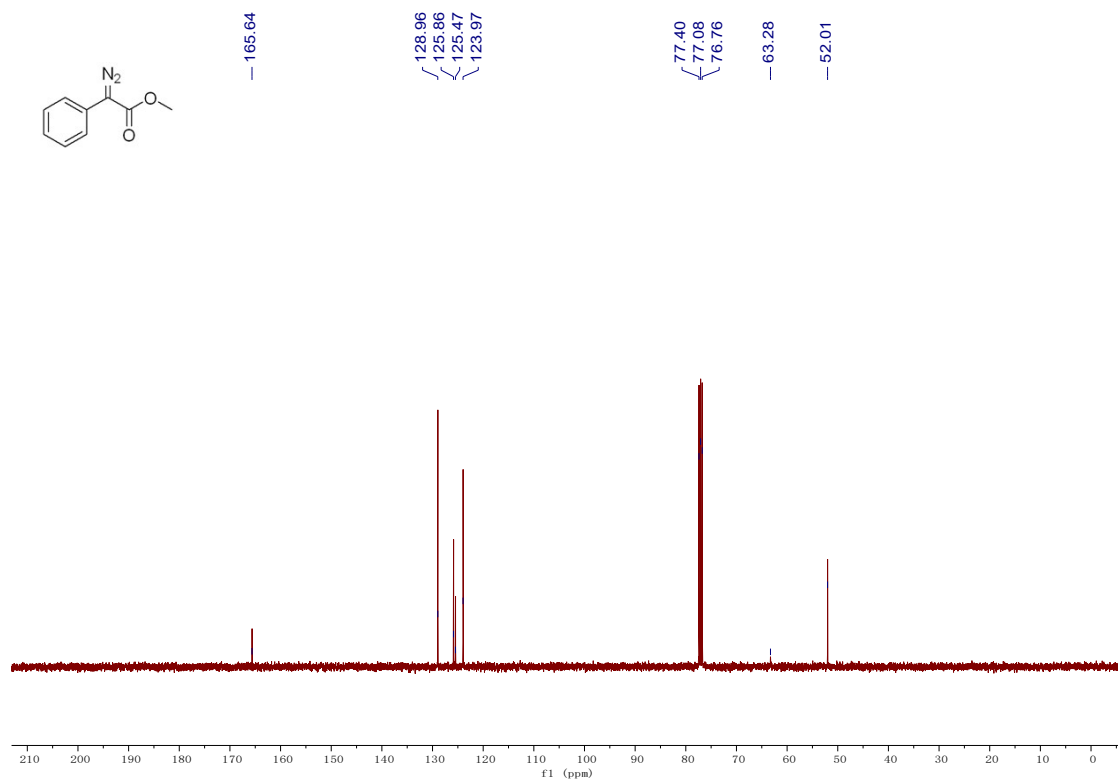

$^{13}\text{C}\{^1\text{H}\}$  NMR of 3a in  $\text{CDCl}_3$  (100 MHz)

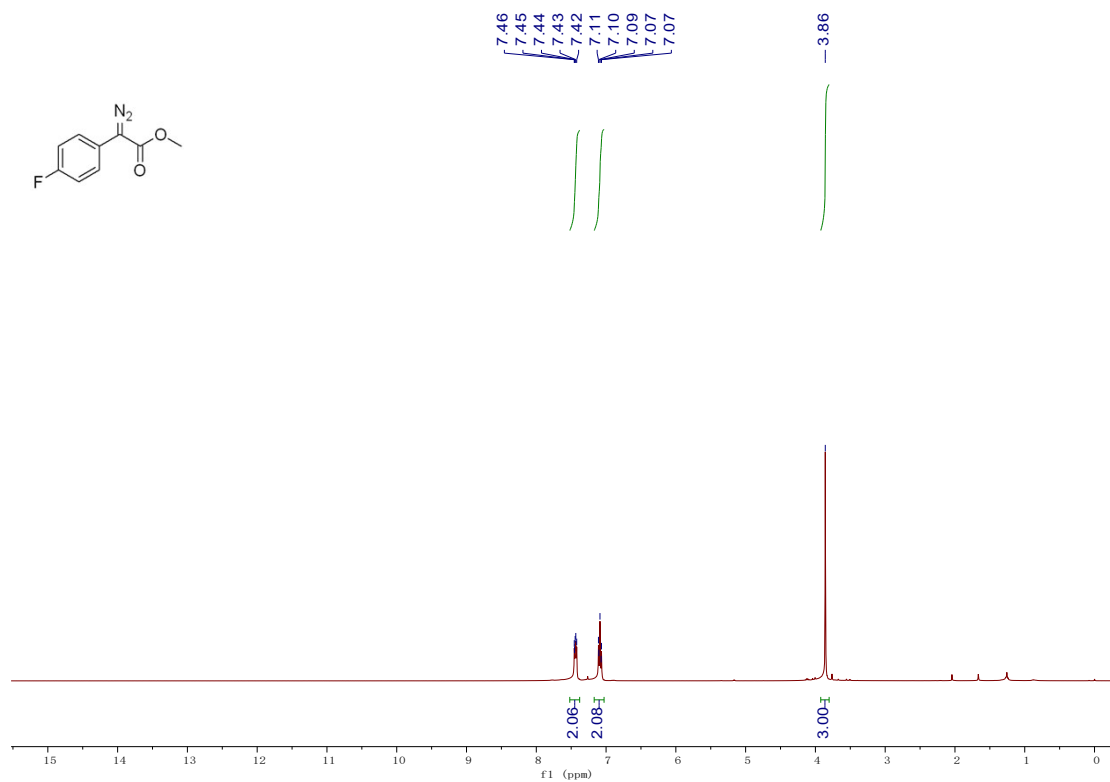

<sup>1</sup>H NMR of 3b in CDCl<sub>3</sub> (400 MHz)

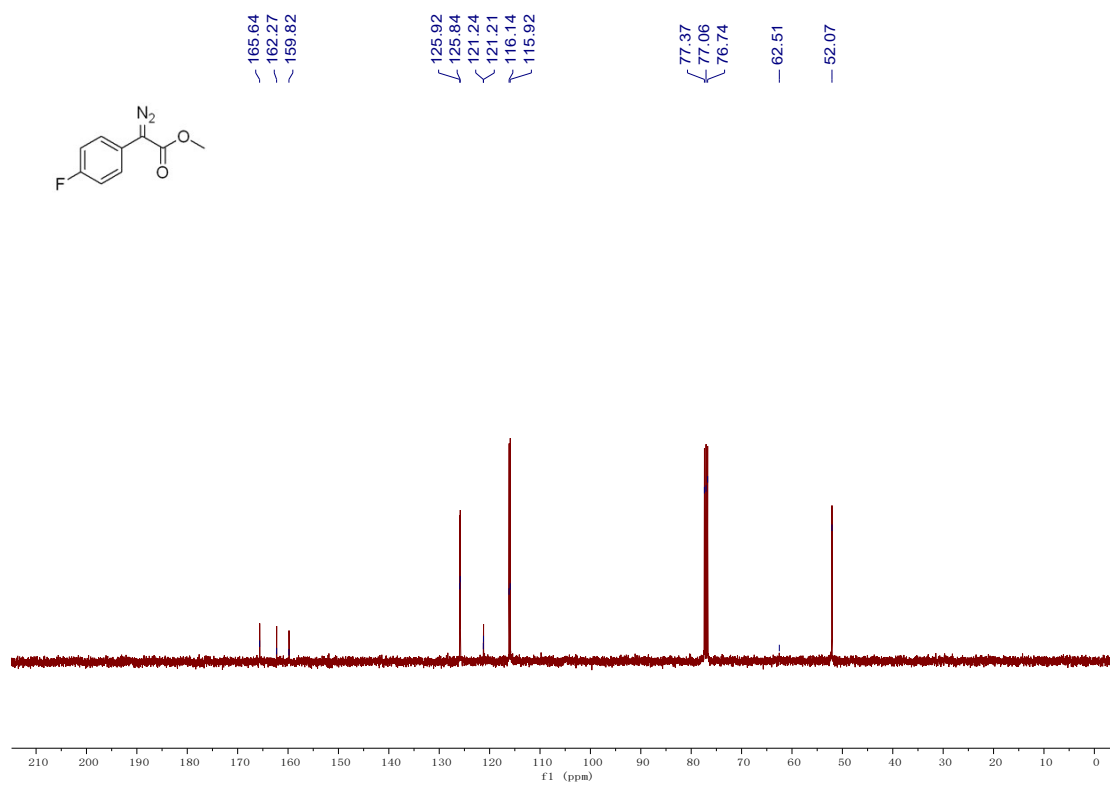

<sup>13</sup>C{<sup>1</sup>H} NMR of 3b in CDCl<sub>3</sub> (100 MHz)

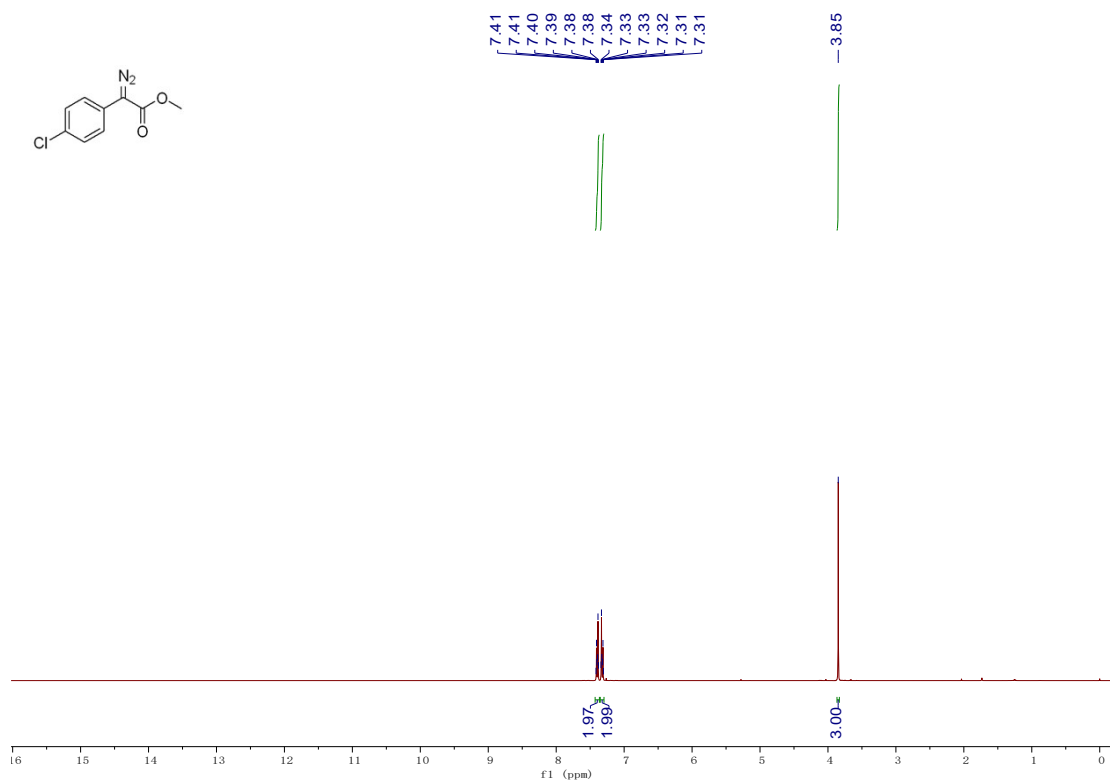

$^1\text{H NMR}$  of 3d in  $\text{CDCl}_3$  (400 MHz)

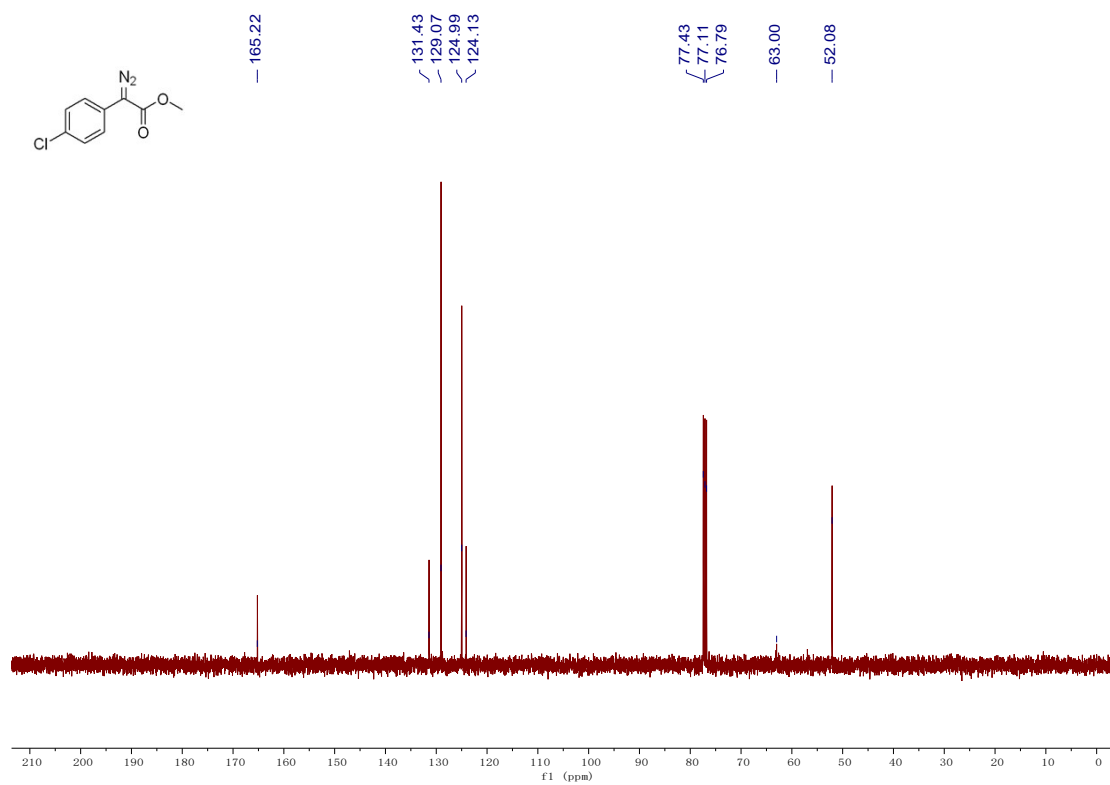

$^{13}\text{C}\{^1\text{H}\}$  NMR of 3d in  $\text{CDCl}_3$  (100 MHz)



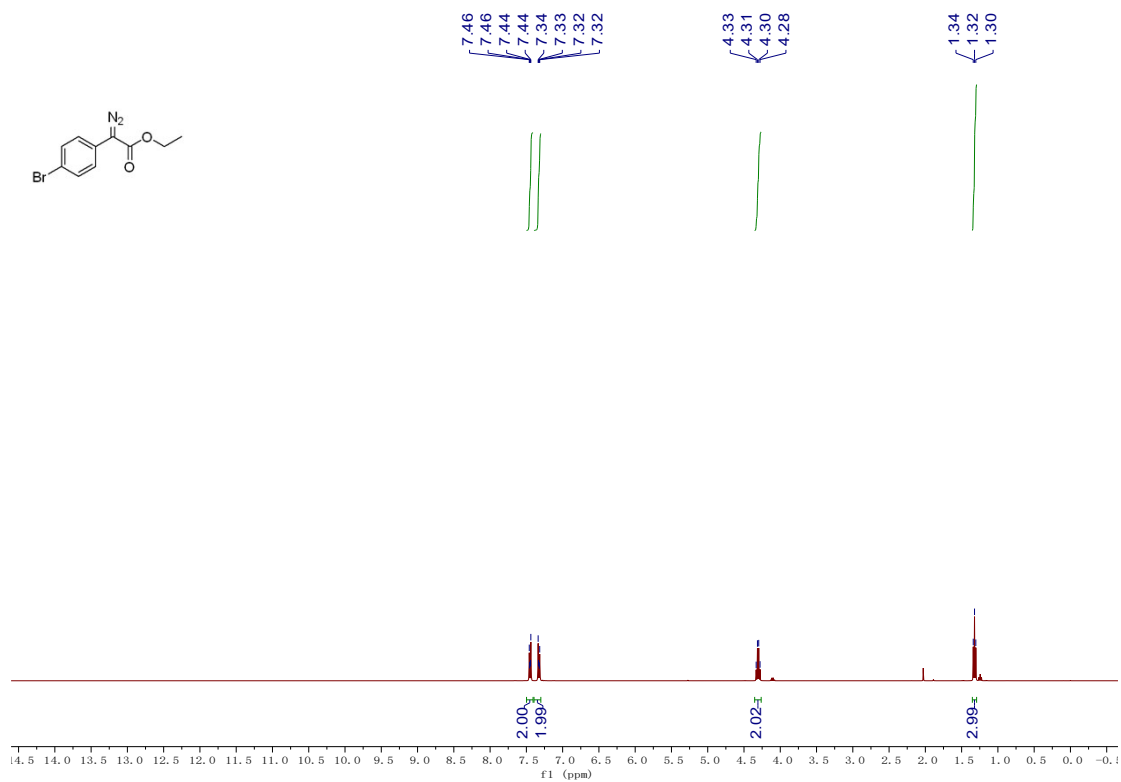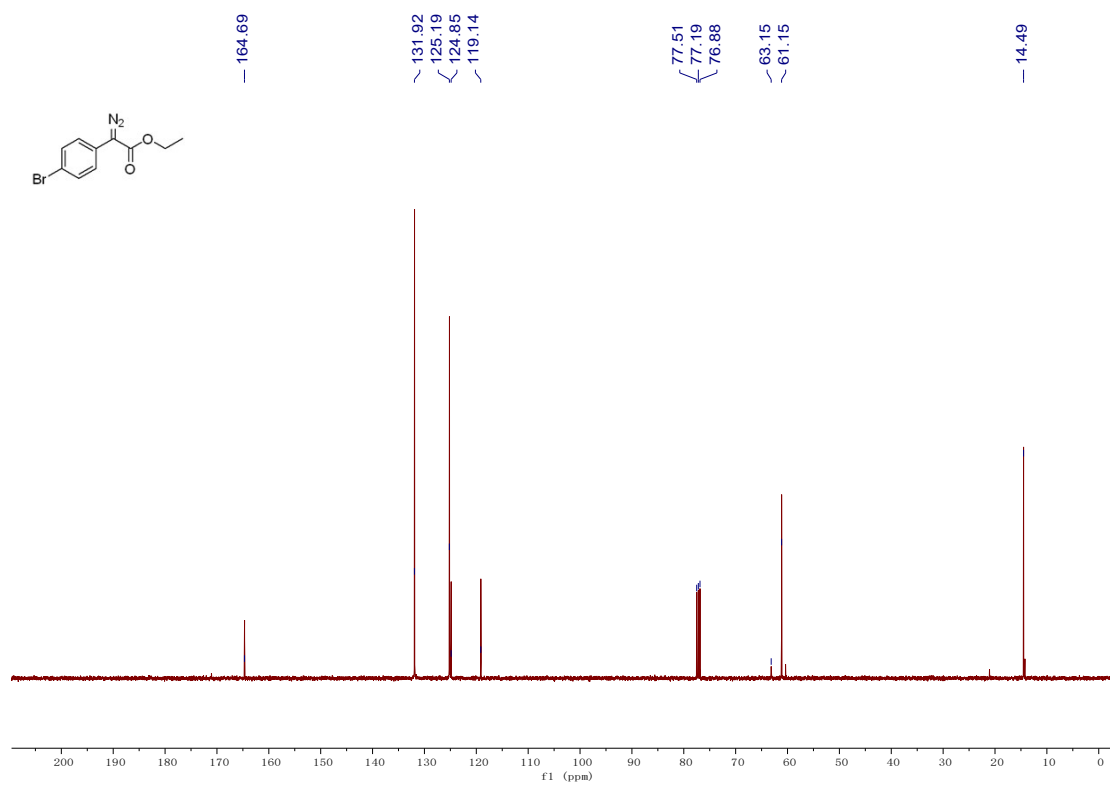

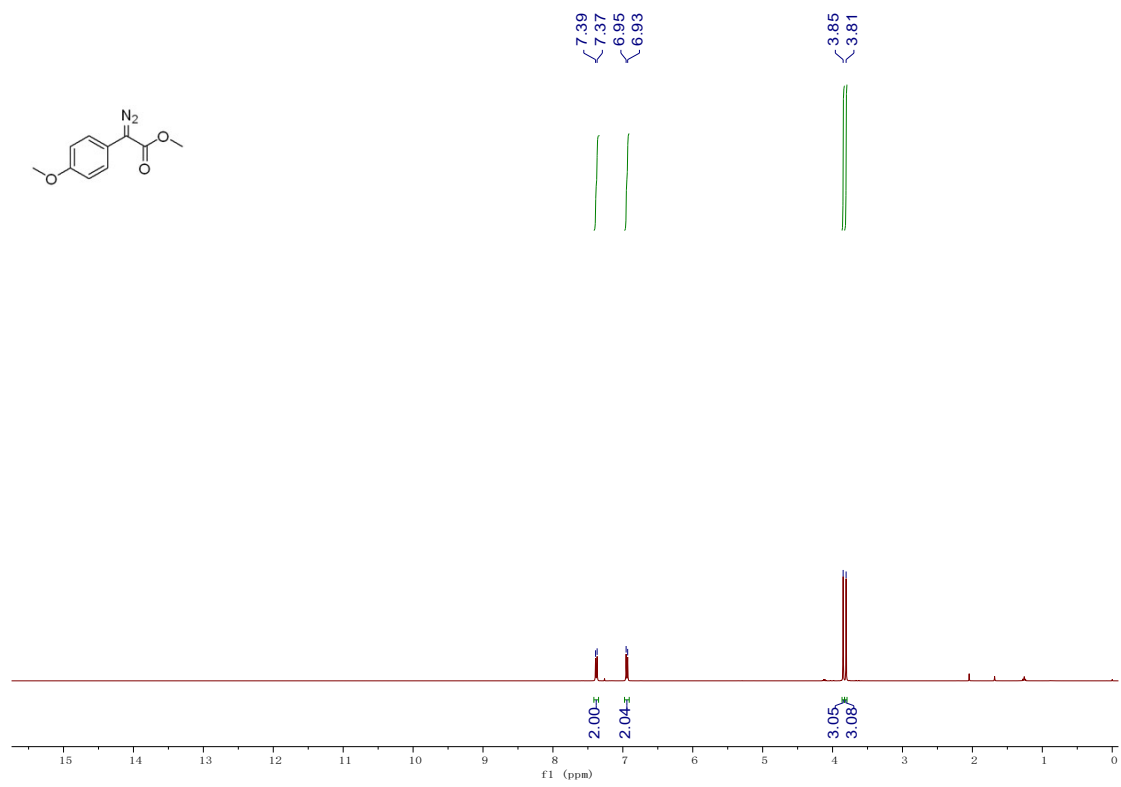

**<sup>1</sup>H NMR of 3f in CDCl<sub>3</sub> (400 MHz)**

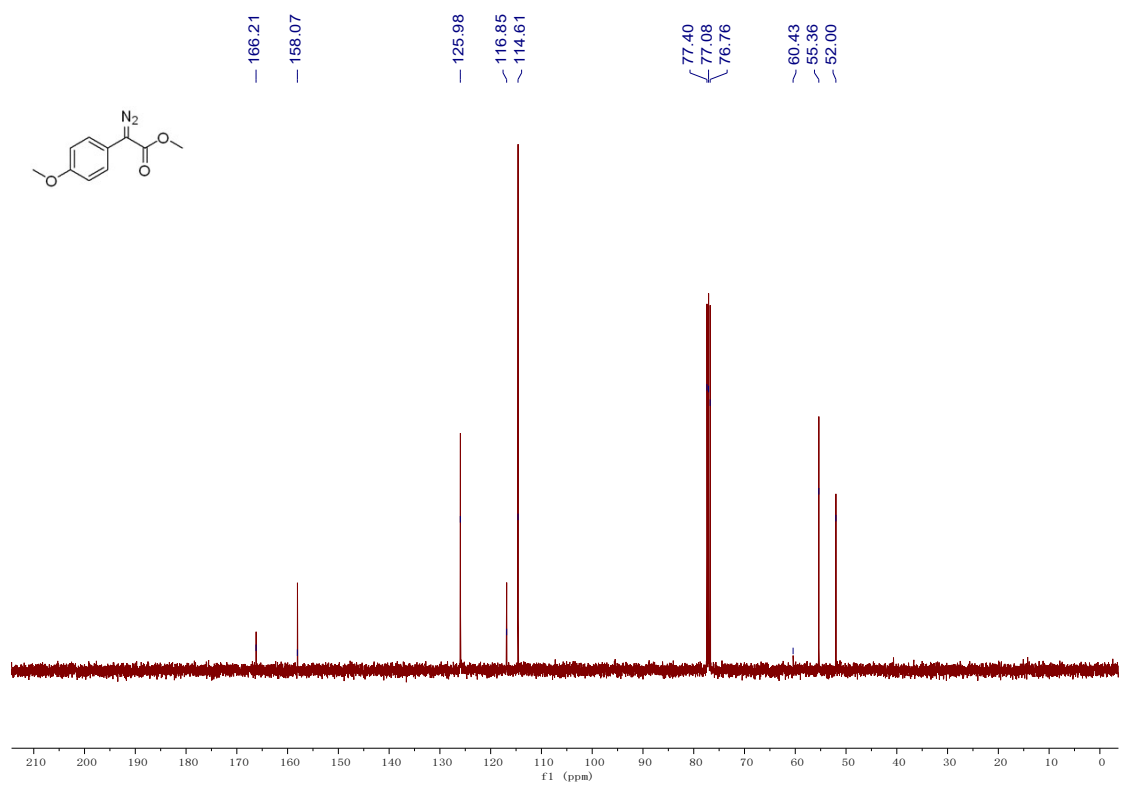

**<sup>13</sup>C{<sup>1</sup>H} NMR of 3f in CDCl<sub>3</sub> (100 MHz)**

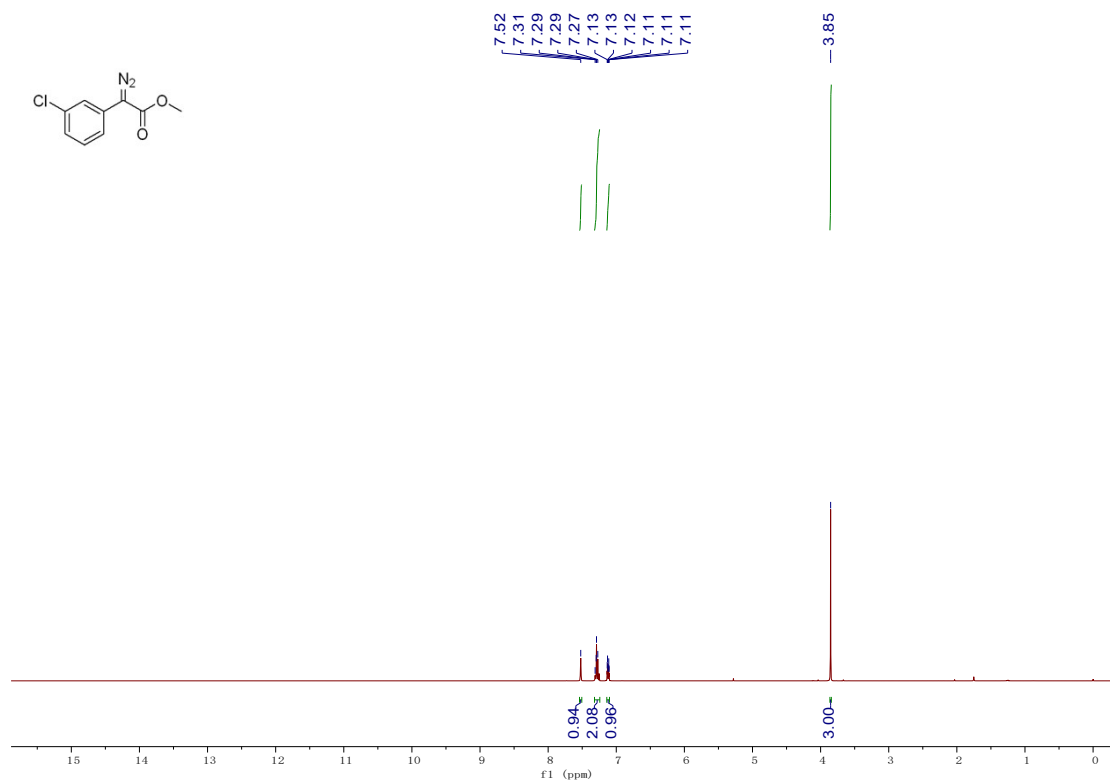

$^1\text{H NMR}$  of 3g in  $\text{CDCl}_3$  (400 MHz)

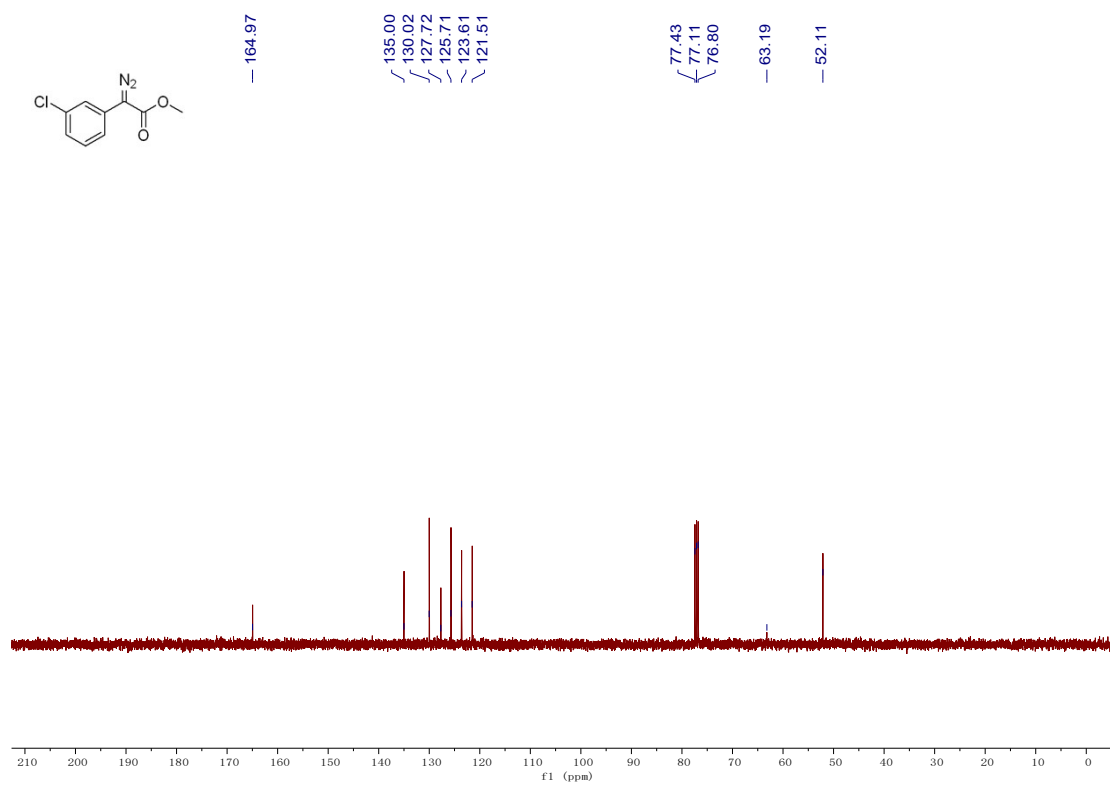

$^{13}\text{C}\{^1\text{H}\}$  NMR of 3g in  $\text{CDCl}_3$  (100 MHz)

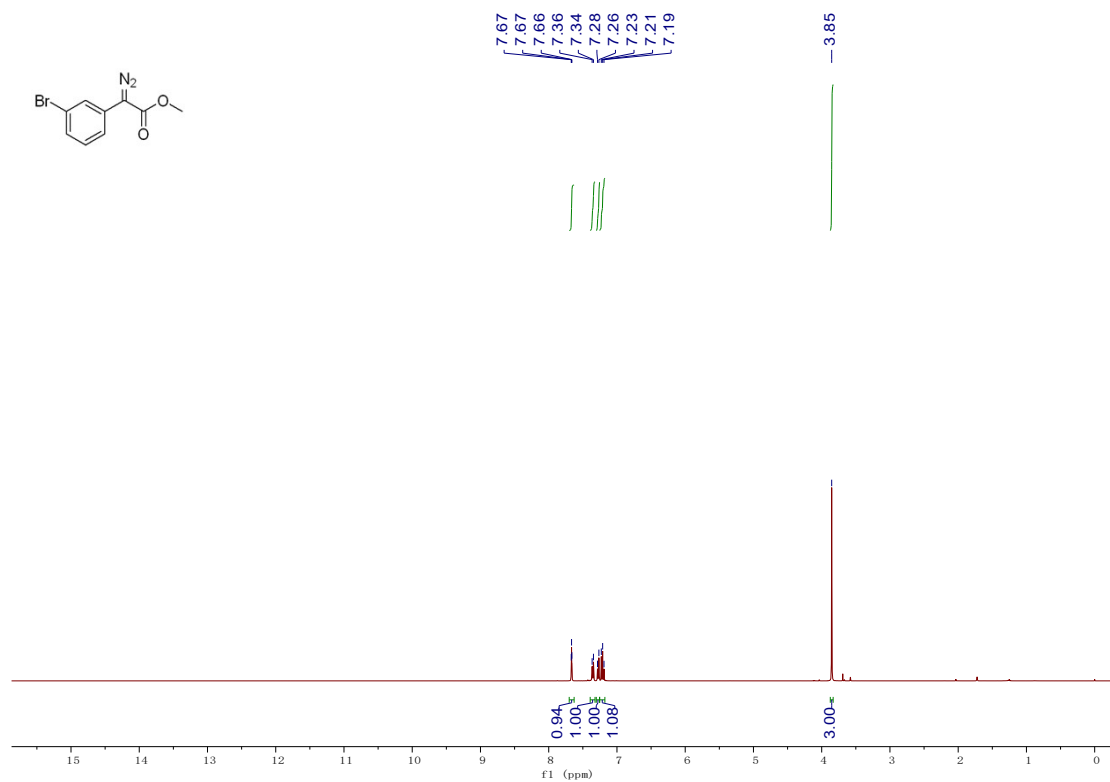

$^1\text{H}$  NMR of 3h in  $\text{CDCl}_3$  (400 MHz)

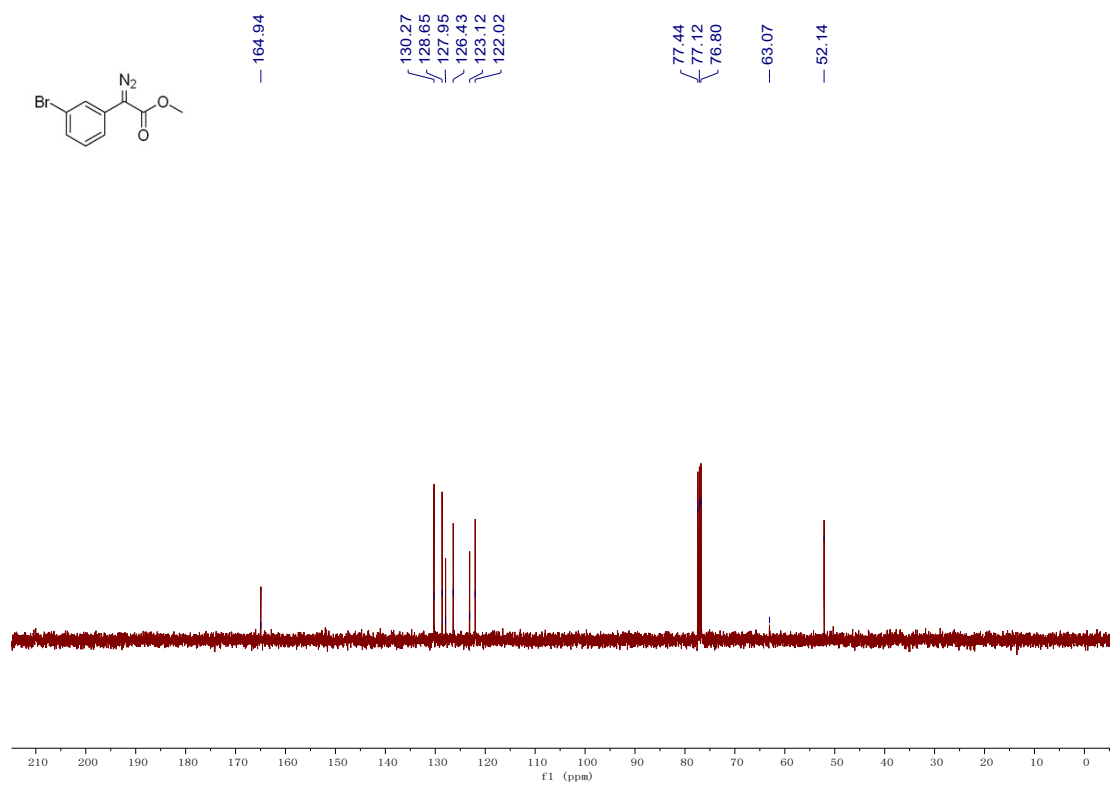

$^{13}\text{C}\{^1\text{H}\}$  NMR of 3h in  $\text{CDCl}_3$  (100 MHz)

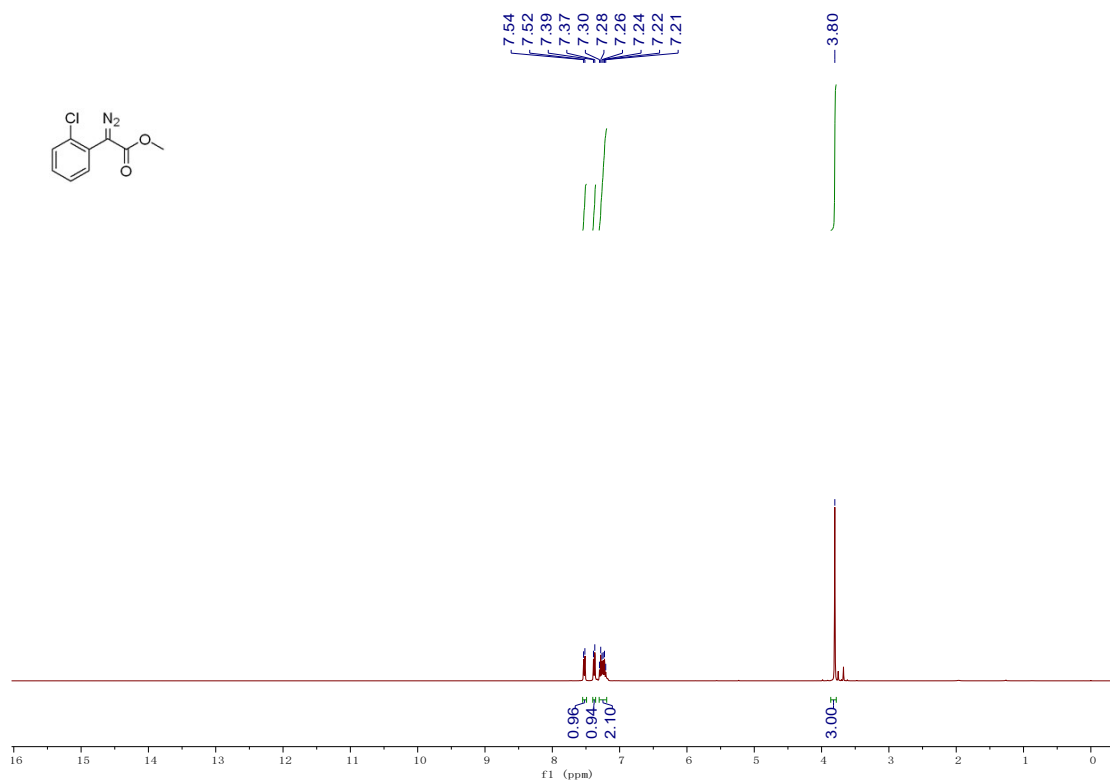

$^1\text{H NMR}$  of 3i in  $\text{CDCl}_3$  (400 MHz)

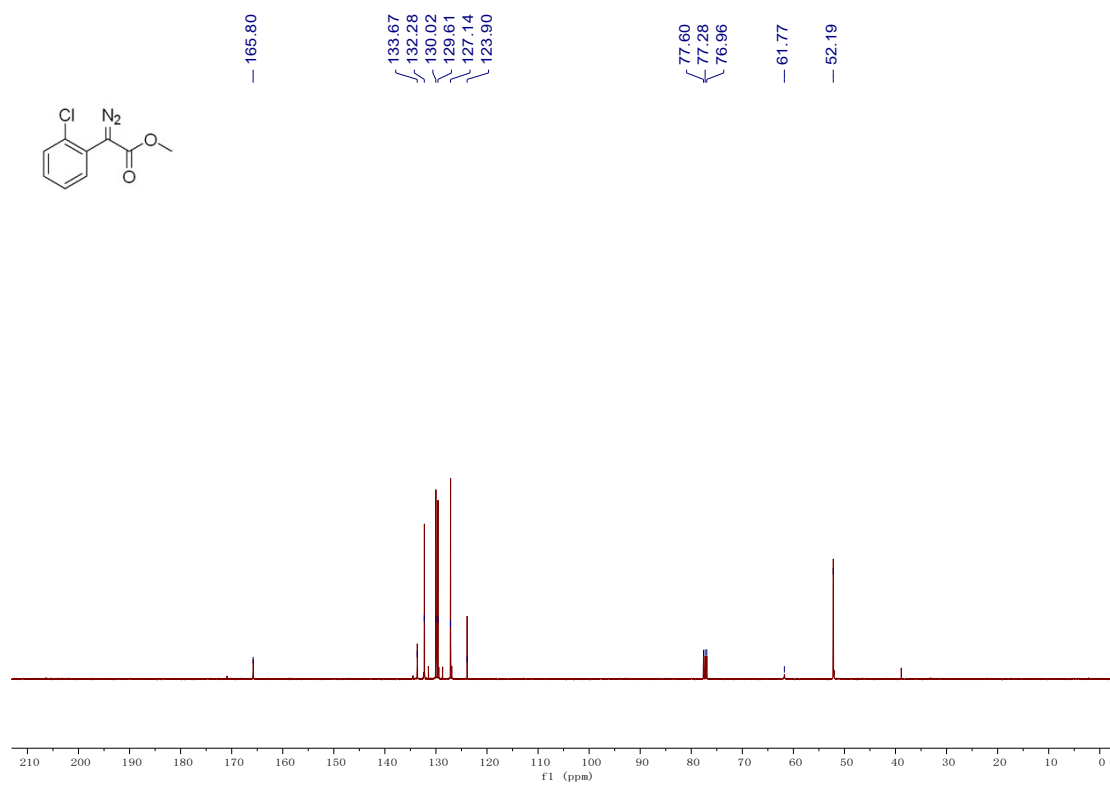

$^{13}\text{C}\{^1\text{H}\}$  NMR of 3i in  $\text{CDCl}_3$  (100 MHz)

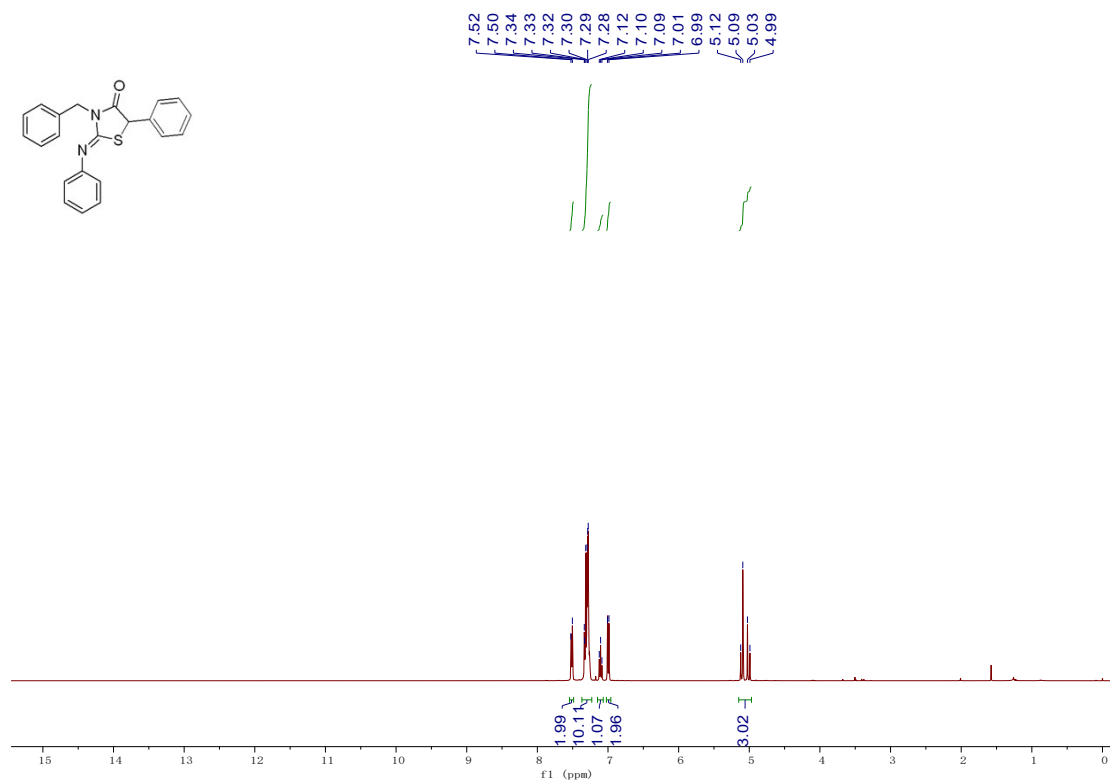

**<sup>1</sup>H NMR of 4a in CDCl<sub>3</sub> (400 MHz)**

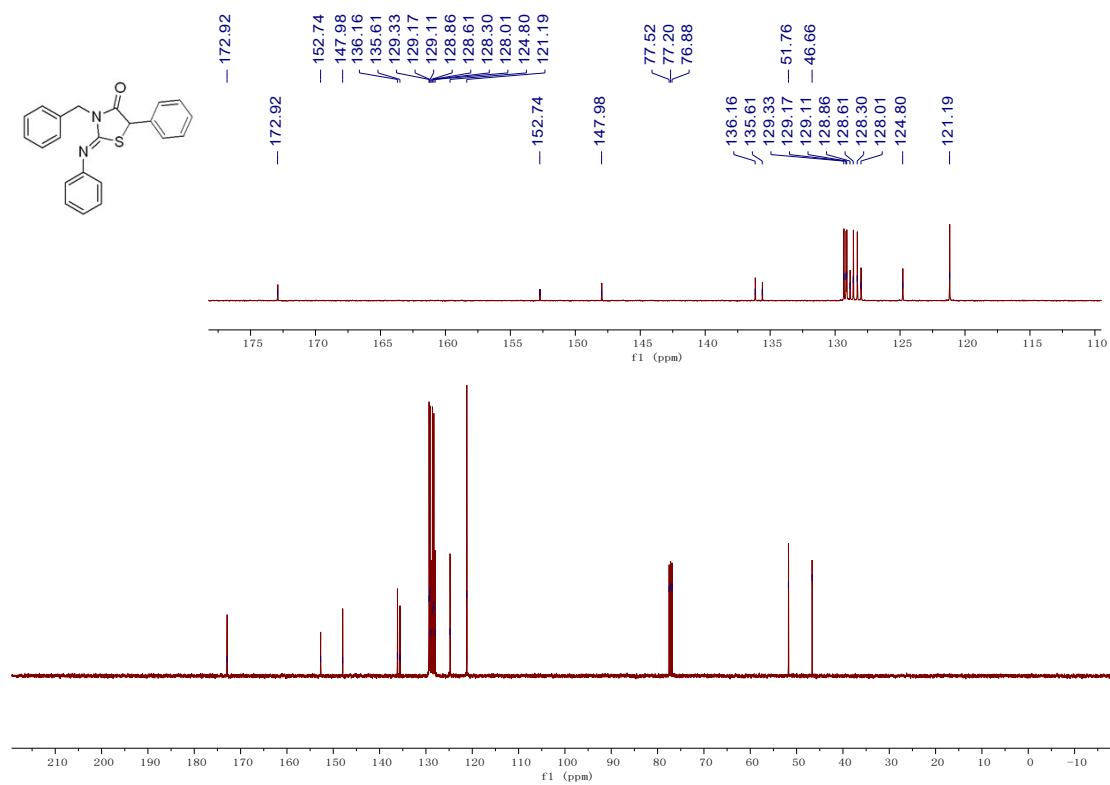

**<sup>13</sup>C{<sup>1</sup>H} NMR of 4a in CDCl<sub>3</sub> (100 MHz)**

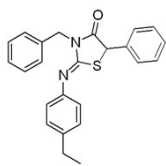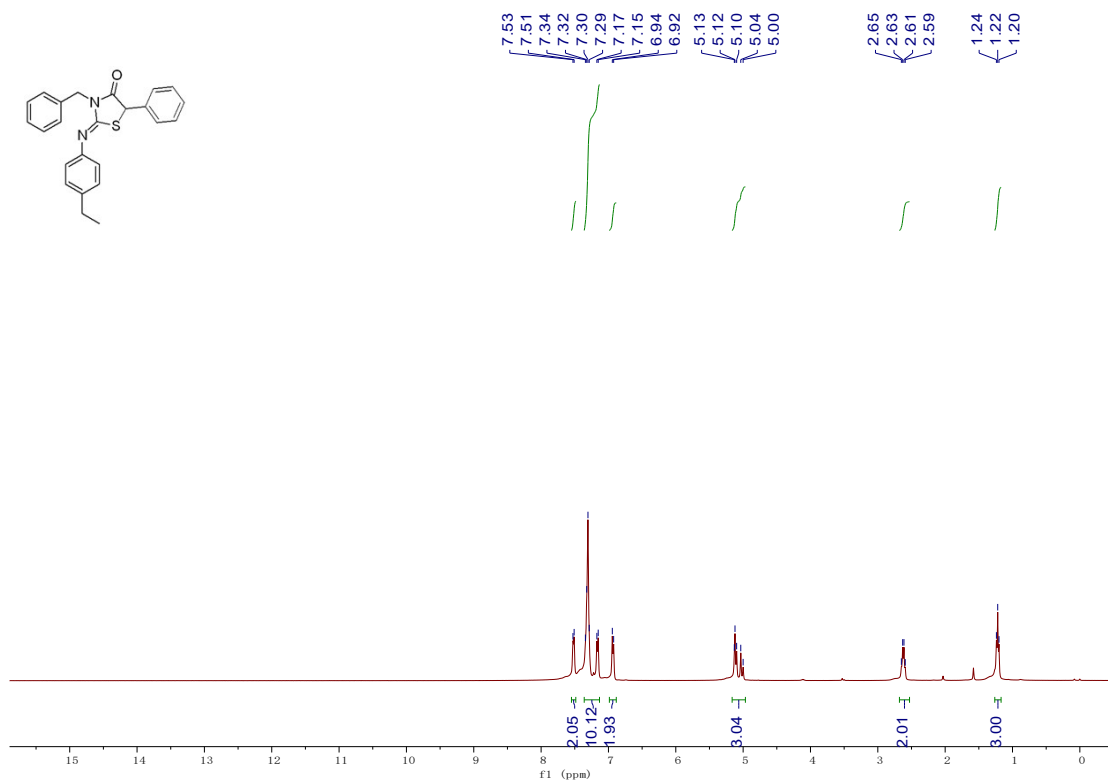

$^1\text{H}$  NMR of 4b in  $\text{CDCl}_3$  (400 MHz)

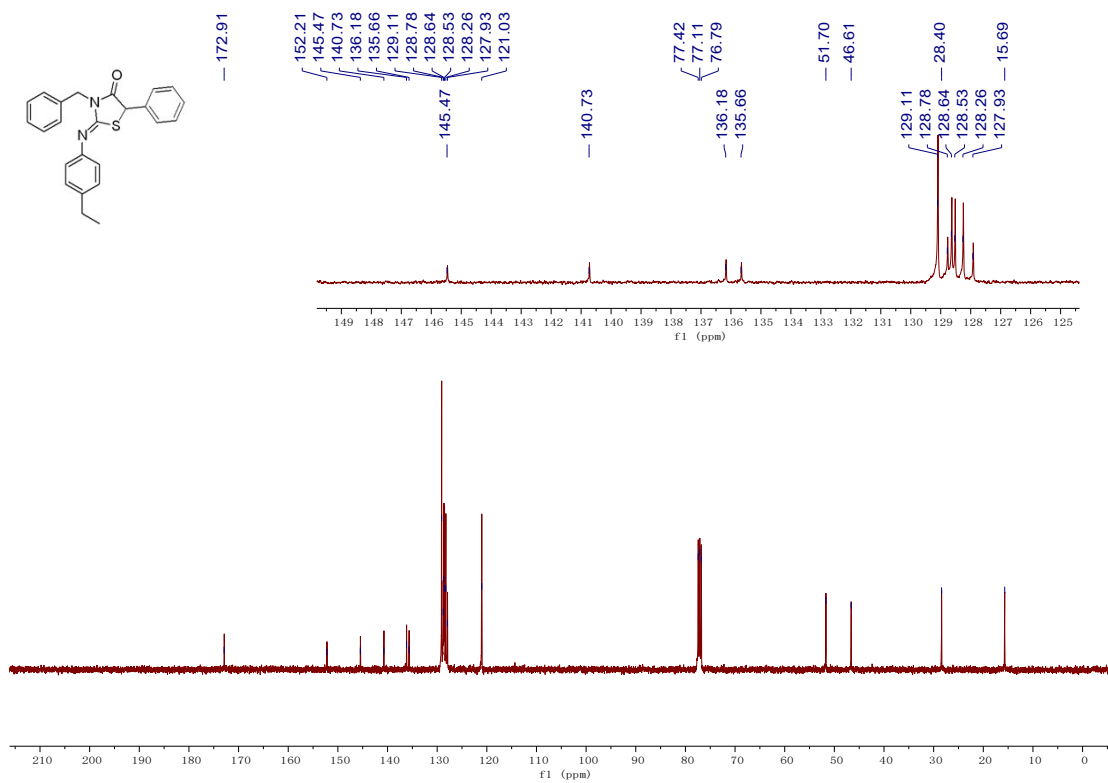

$^{13}\text{C}\{^1\text{H}\}$  NMR of 4b in  $\text{CDCl}_3$  (100 MHz)

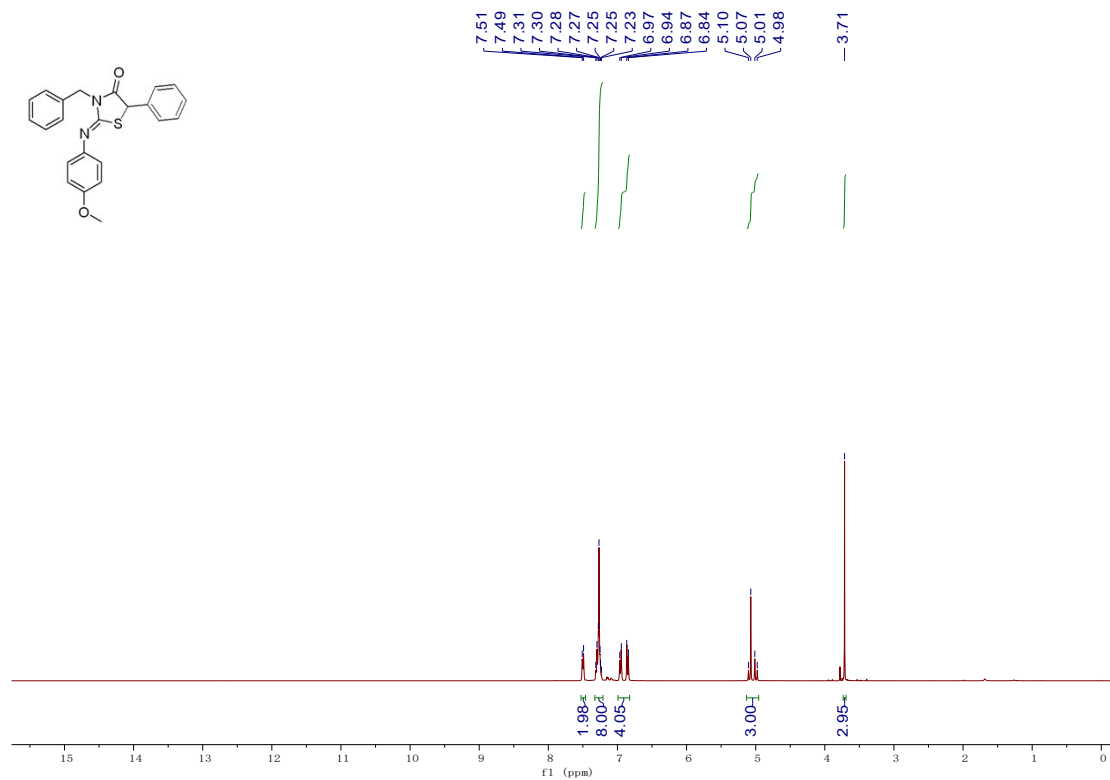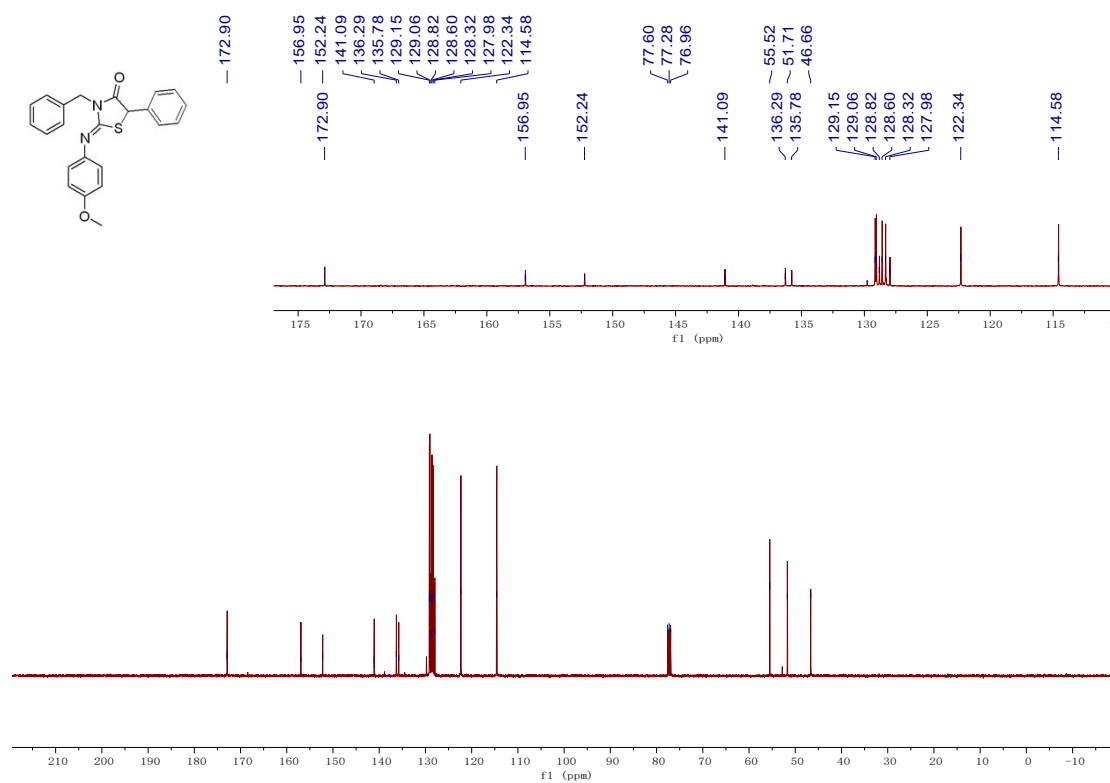



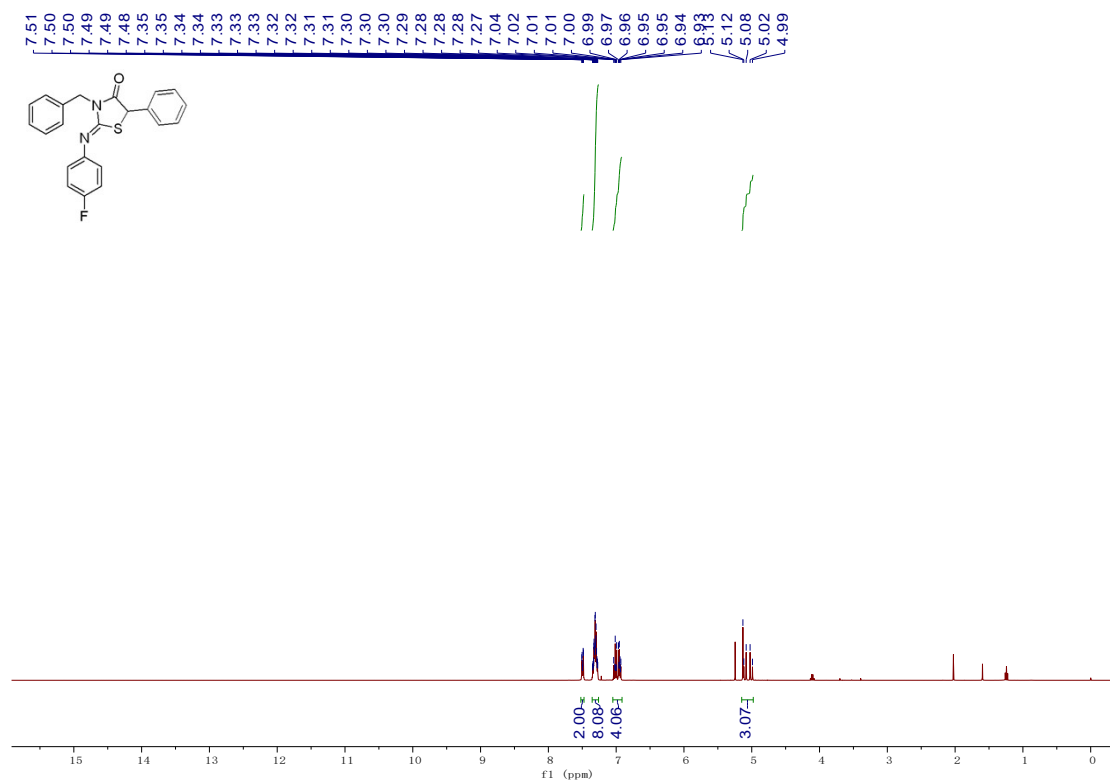

**<sup>1</sup>H NMR of 4d in CDCl<sub>3</sub> (400 MHz)**

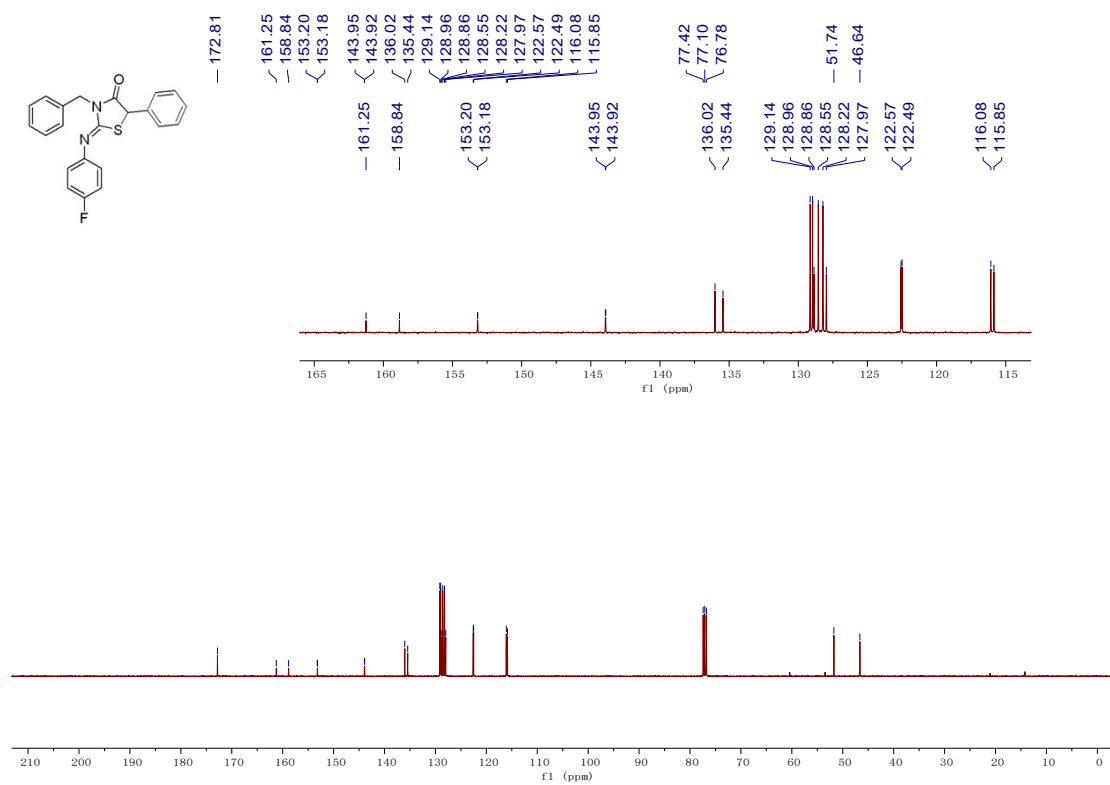

**<sup>13</sup>C{<sup>1</sup>H} NMR of 4d in CDCl<sub>3</sub> (100 MHz)**

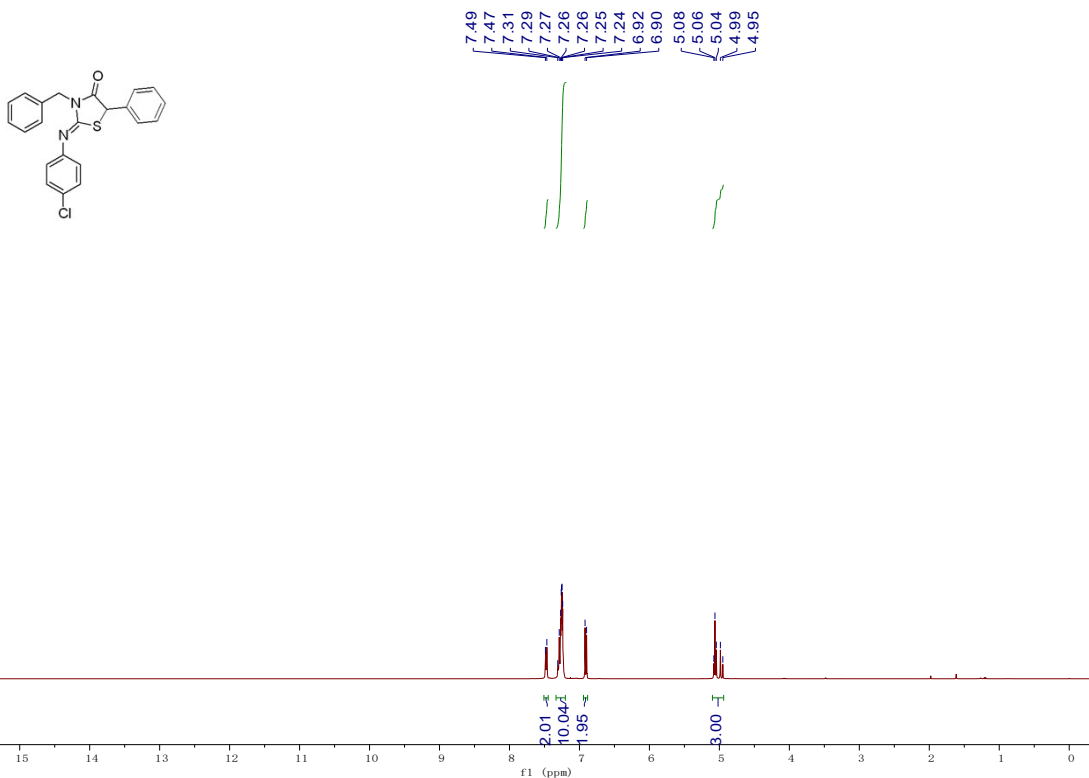

$^1\text{H NMR}$  of 4e in  $\text{CDCl}_3$  (400 MHz)

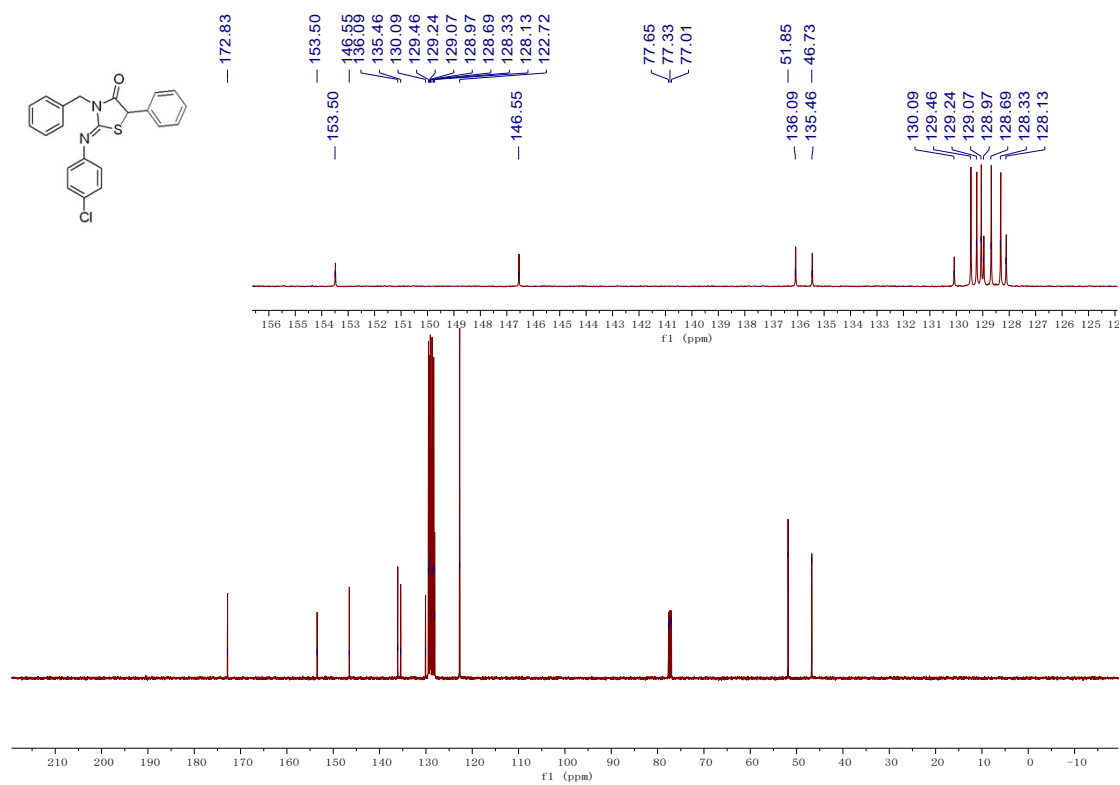

$^{13}\text{C}\{^1\text{H}\}$  NMR of 4e in  $\text{CDCl}_3$  (100 MHz)

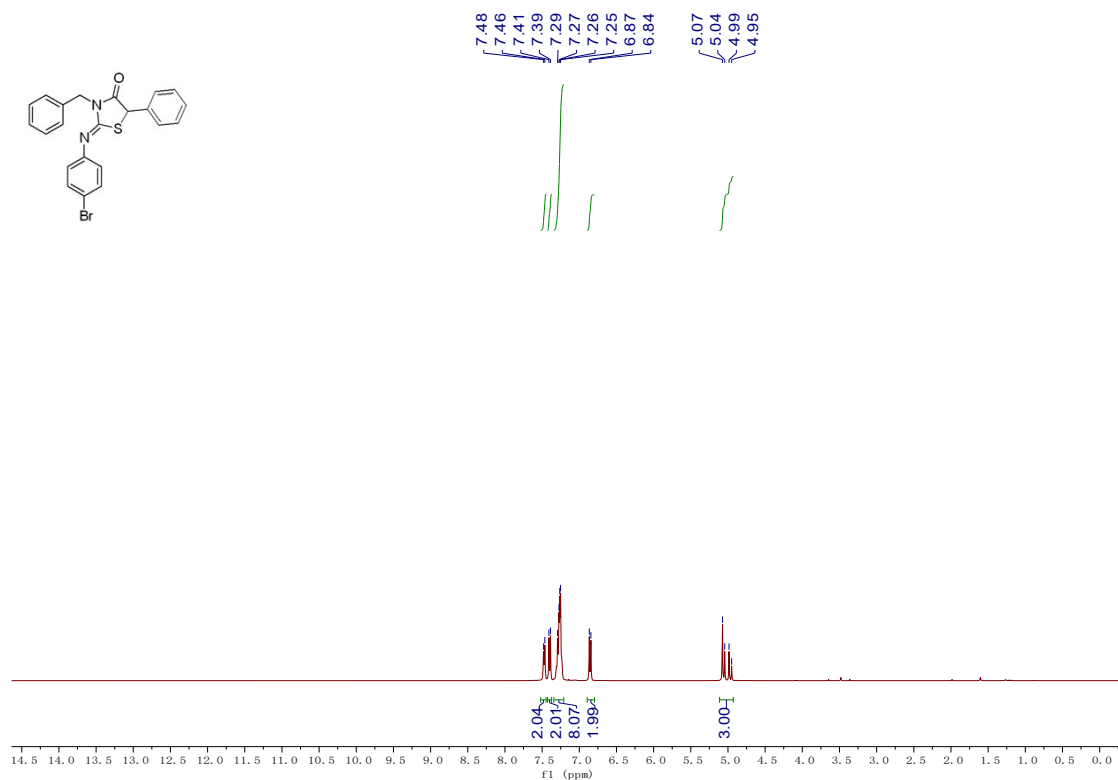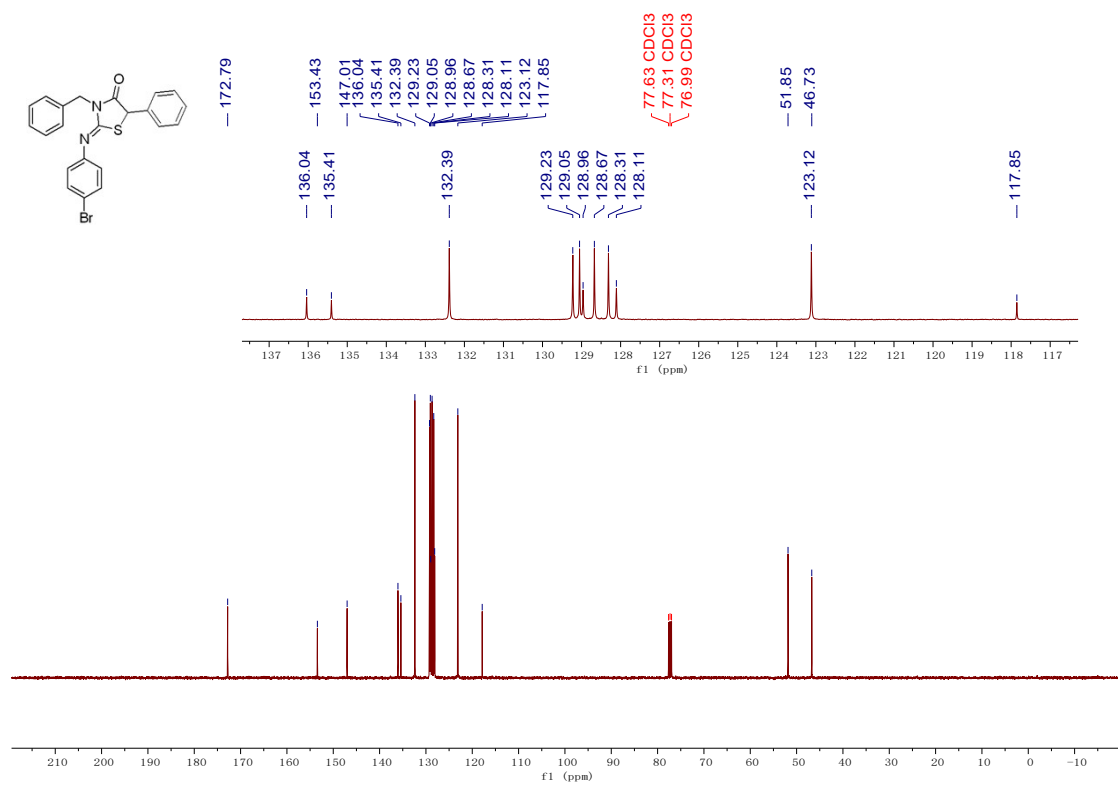

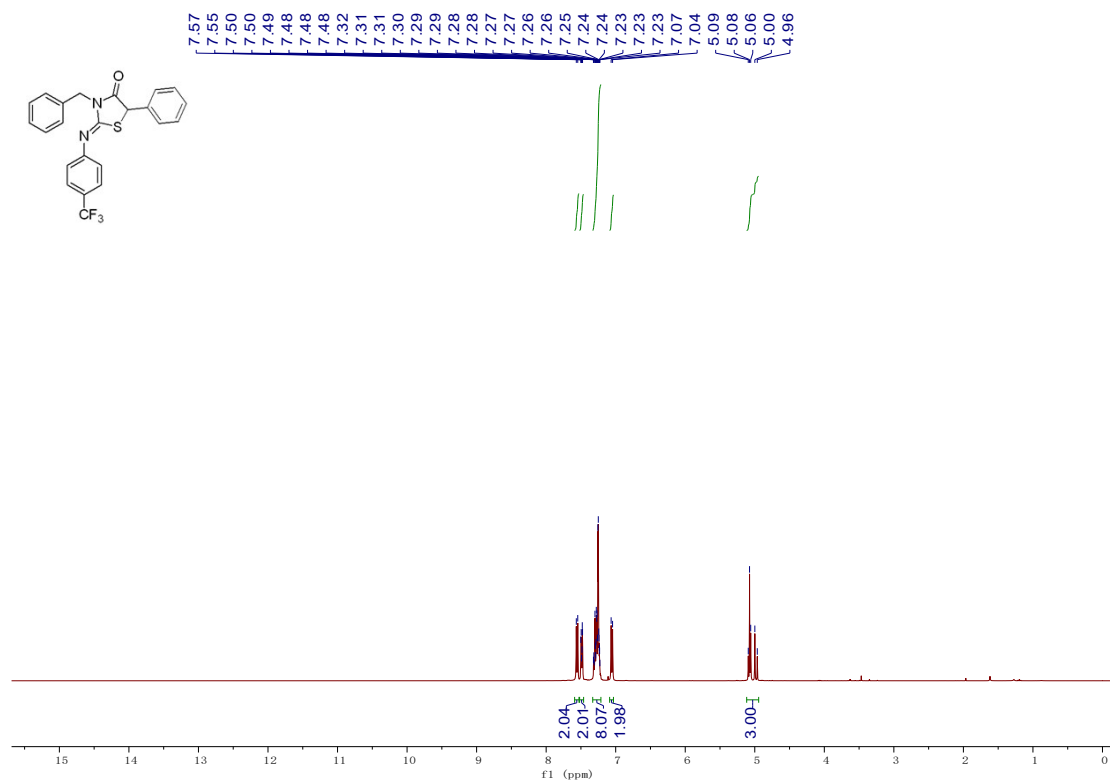

**<sup>1</sup>H NMR of 4g in CDCl<sub>3</sub> (400 MHz)**

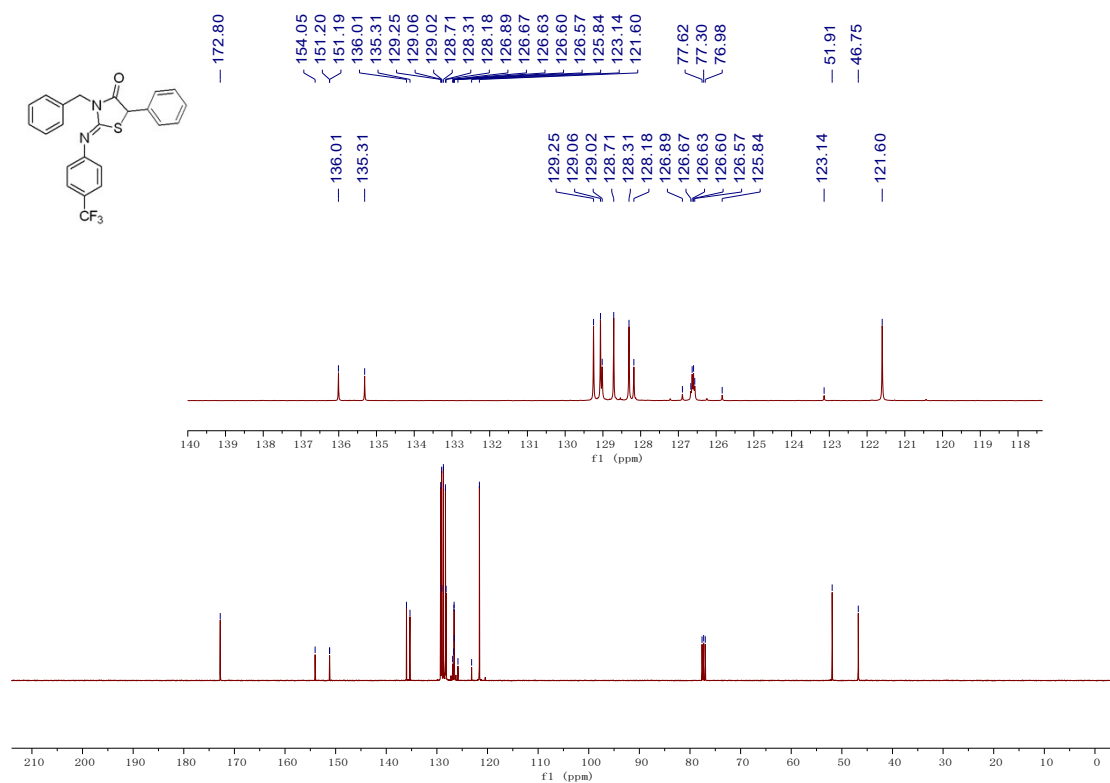

**<sup>13</sup>C{<sup>1</sup>H} NMR of 4g in CDCl<sub>3</sub> (100 MHz)**

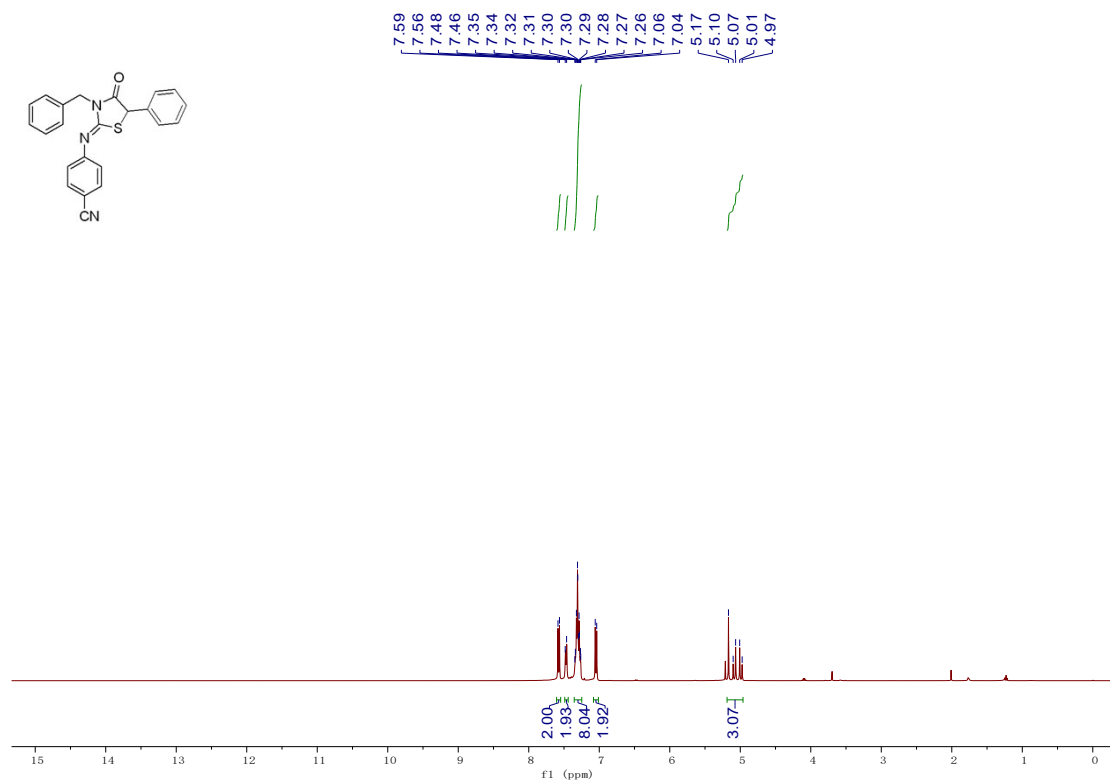

**<sup>1</sup>H NMR of 4h in CDCl<sub>3</sub> (400 MHz)**

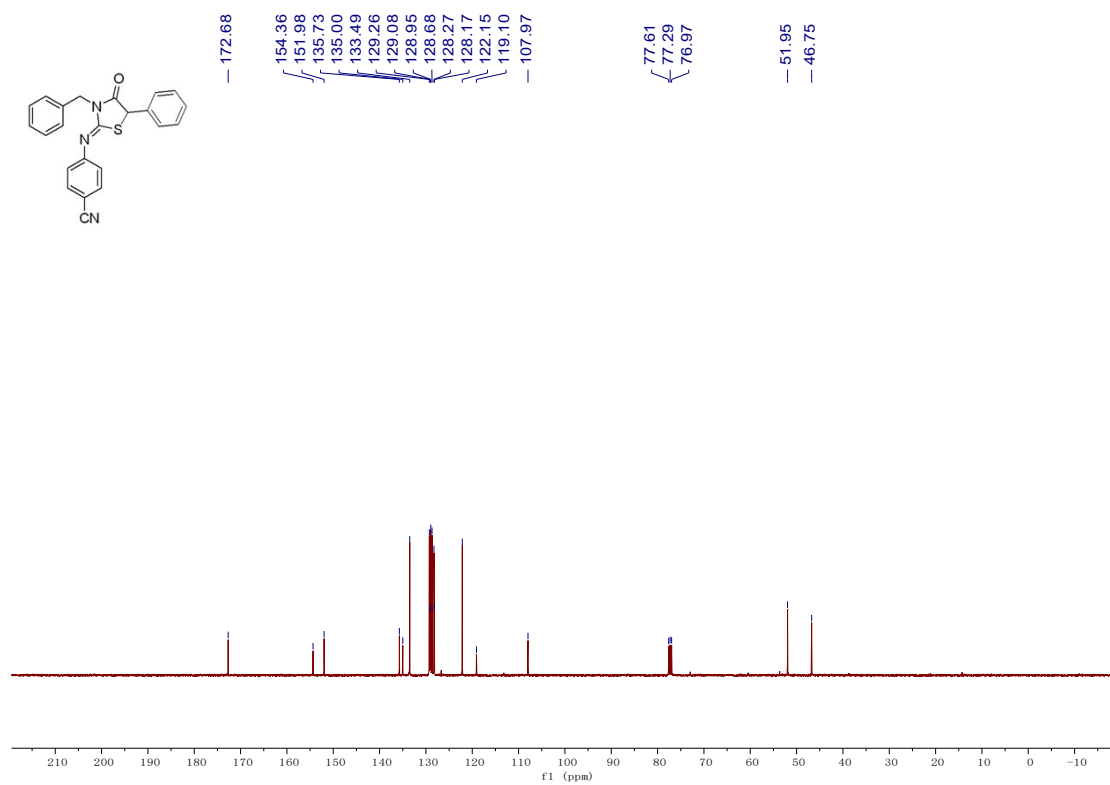

**<sup>13</sup>C{<sup>1</sup>H} NMR of 4h in CDCl<sub>3</sub> (100 MHz)**

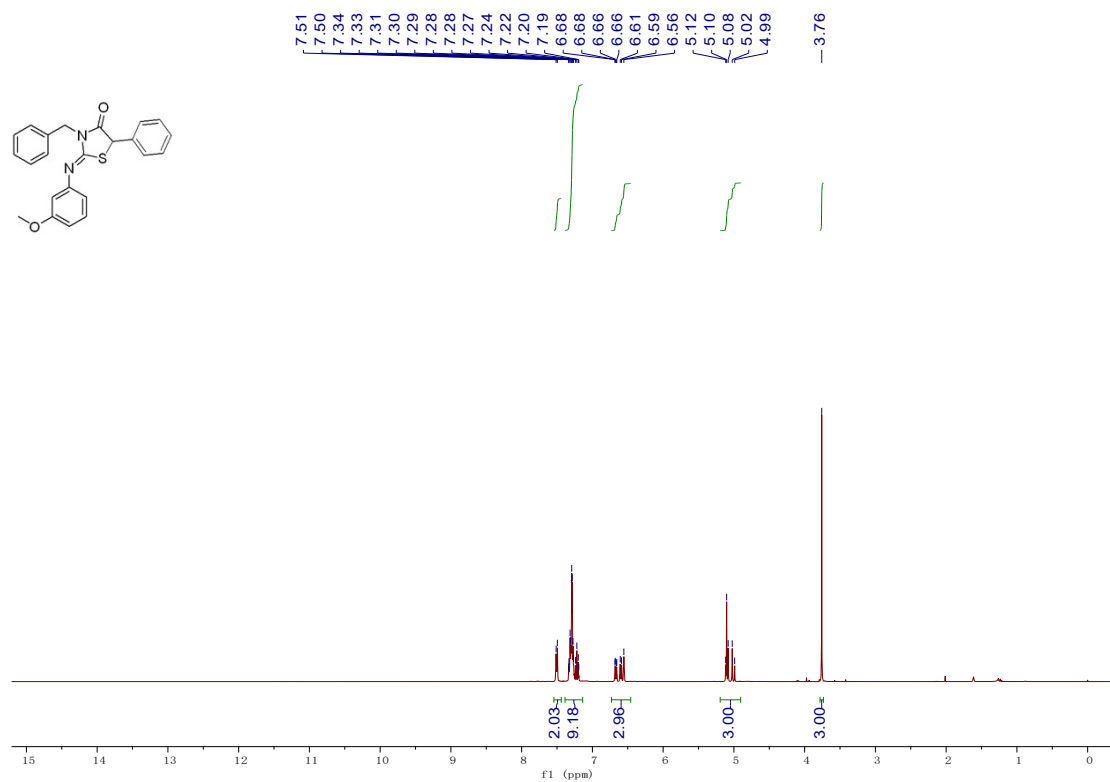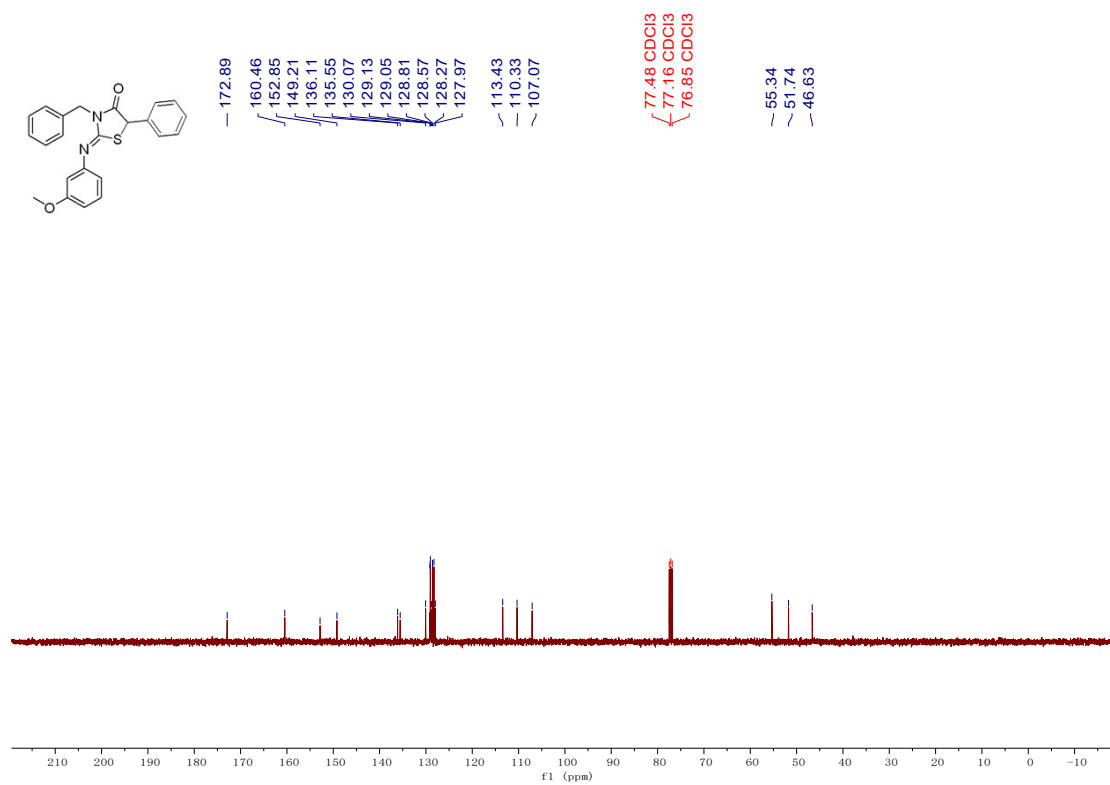

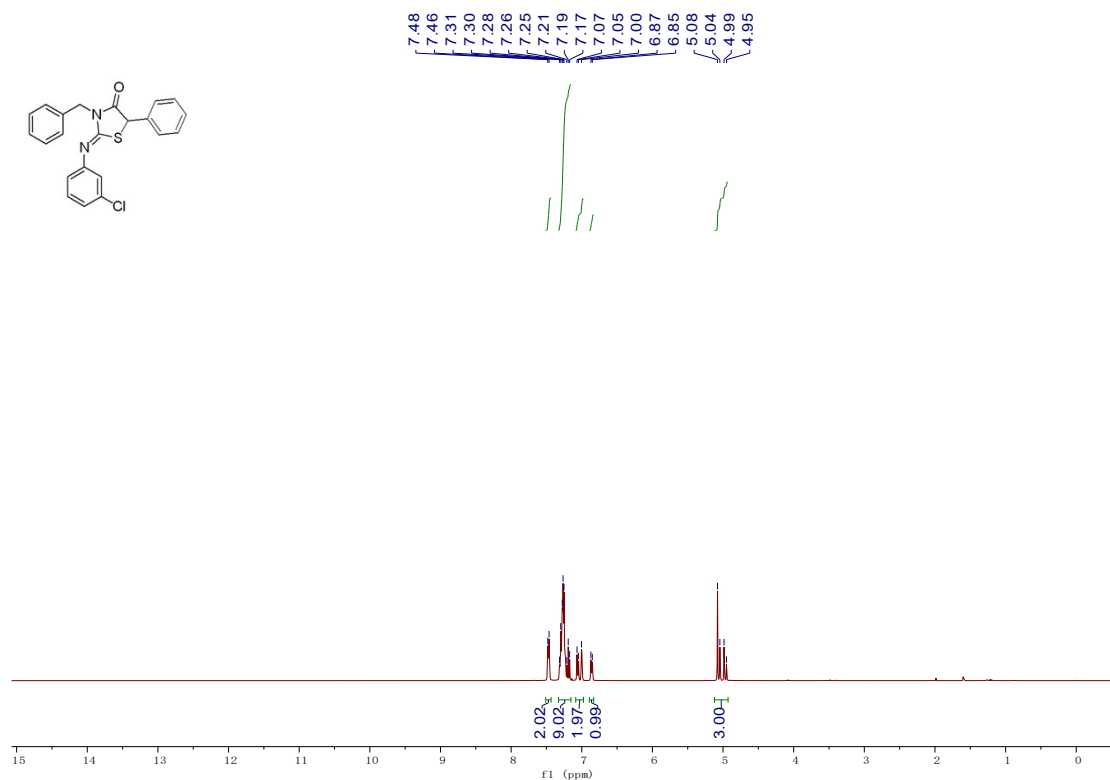

**<sup>1</sup>H NMR of 4j in CDCl<sub>3</sub> (400 MHz)**

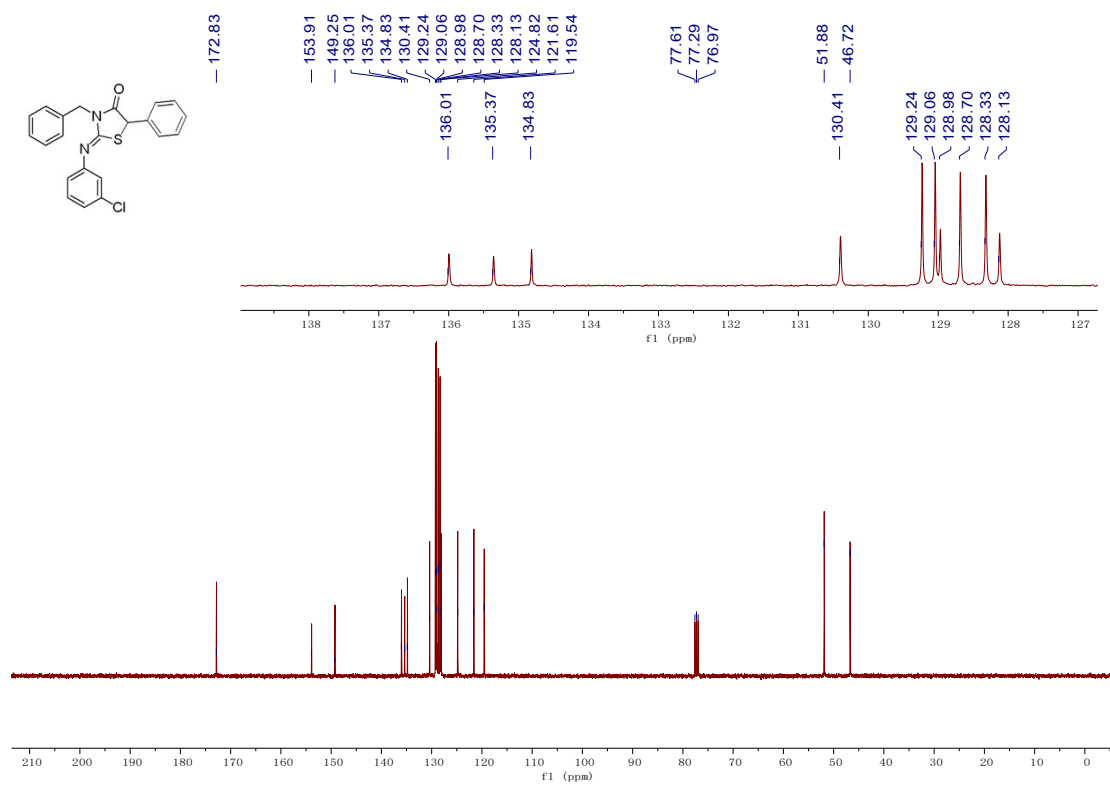

**<sup>13</sup>C{<sup>1</sup>H} NMR of 4j in CDCl<sub>3</sub> (100 MHz)**

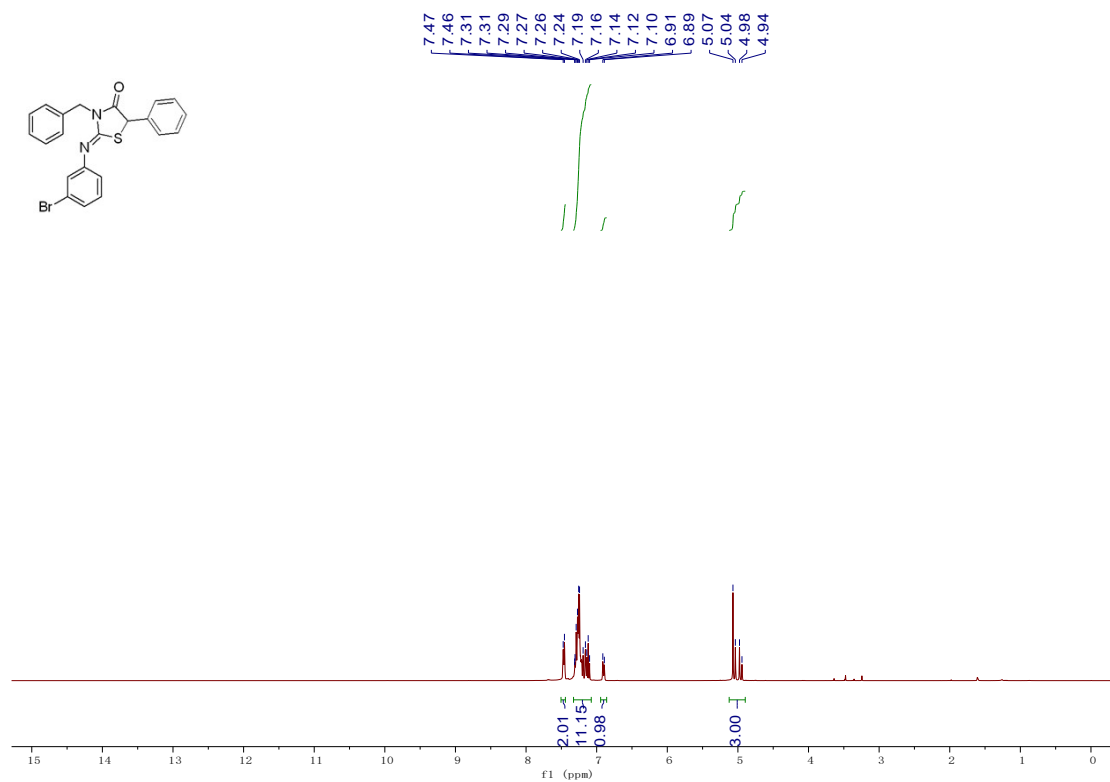

**<sup>1</sup>H NMR of 4k in CDCl<sub>3</sub> (400 MHz)**

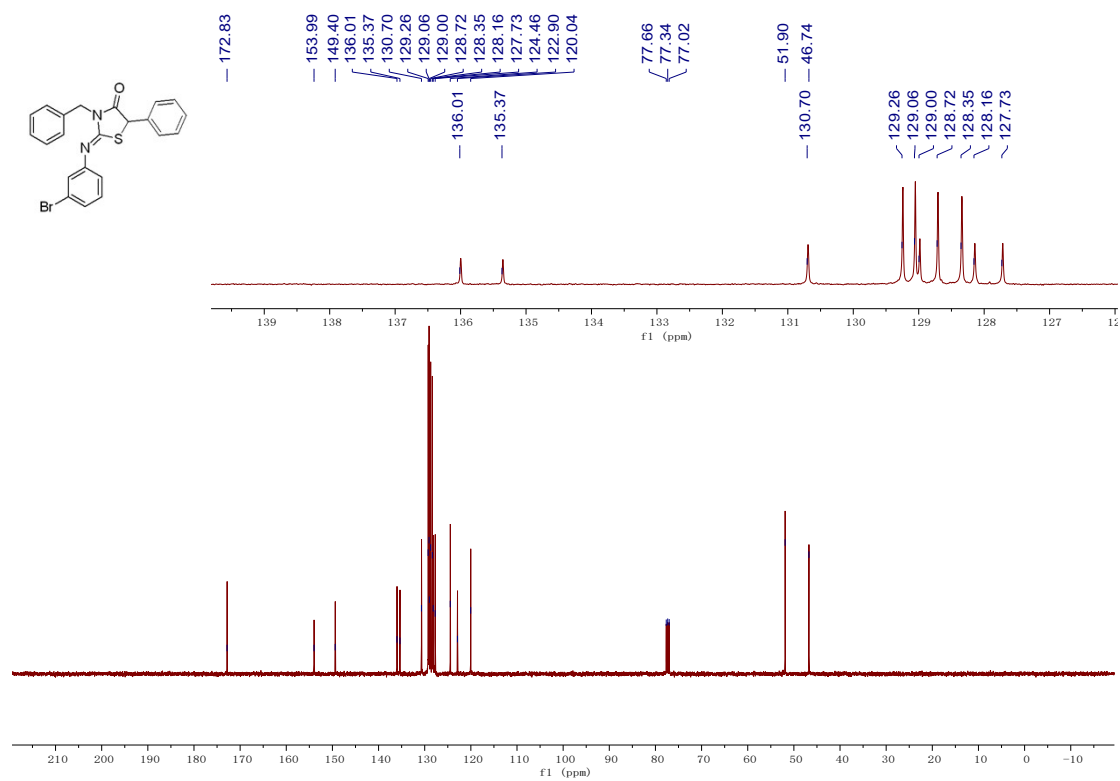

**<sup>13</sup>C{<sup>1</sup>H} NMR of 4k in CDCl<sub>3</sub> (100 MHz)**



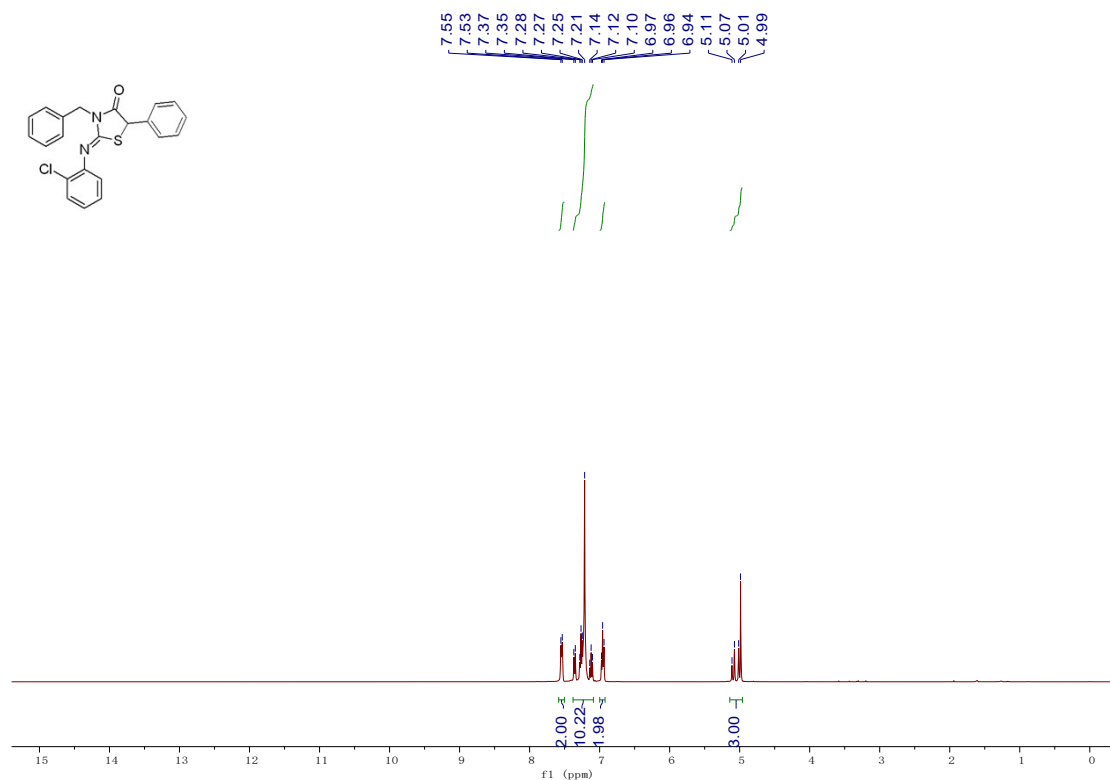

**<sup>1</sup>H NMR of 4l in CDCl<sub>3</sub> (400 MHz)**

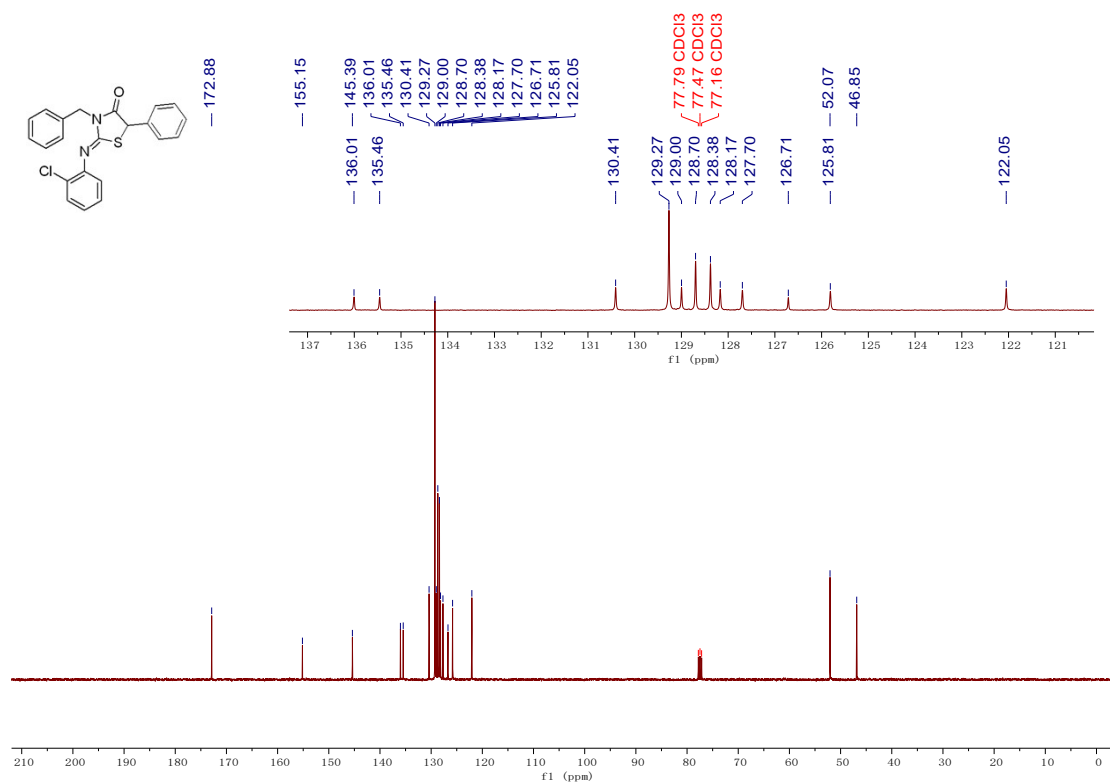

**<sup>13</sup>C{<sup>1</sup>H} NMR of 4l in CDCl<sub>3</sub> (100 MHz)**

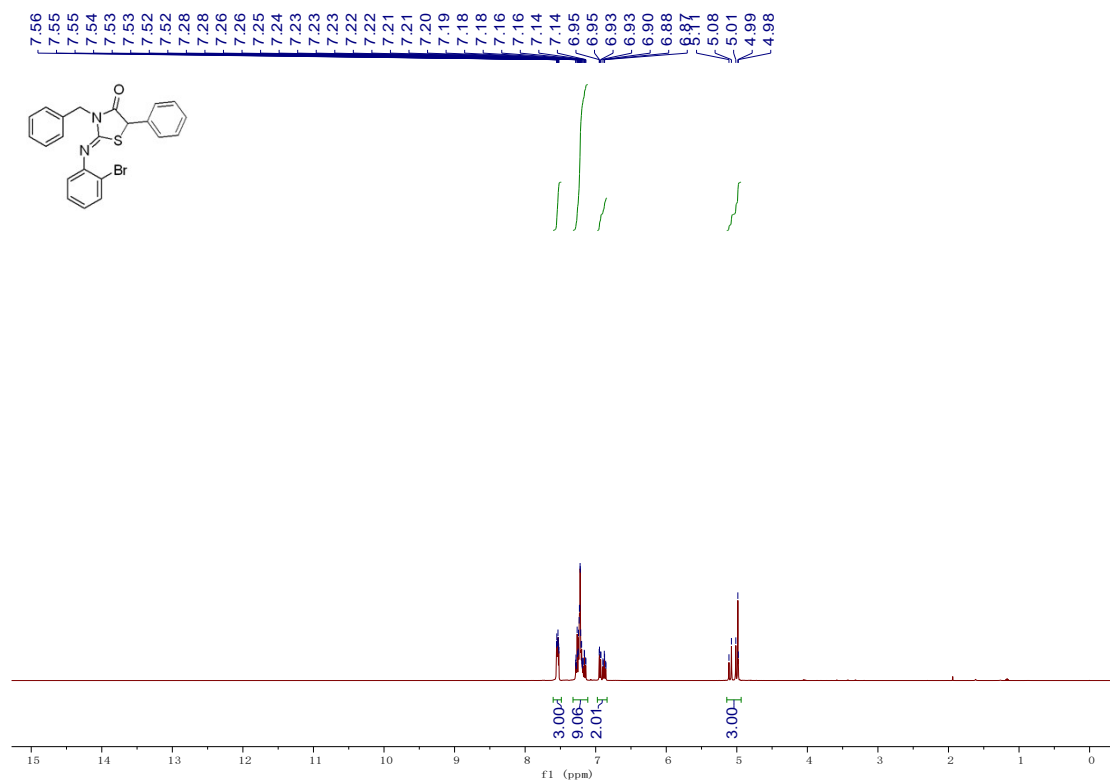

<sup>1</sup>H NMR of 4m in CDCl<sub>3</sub> (400 MHz)

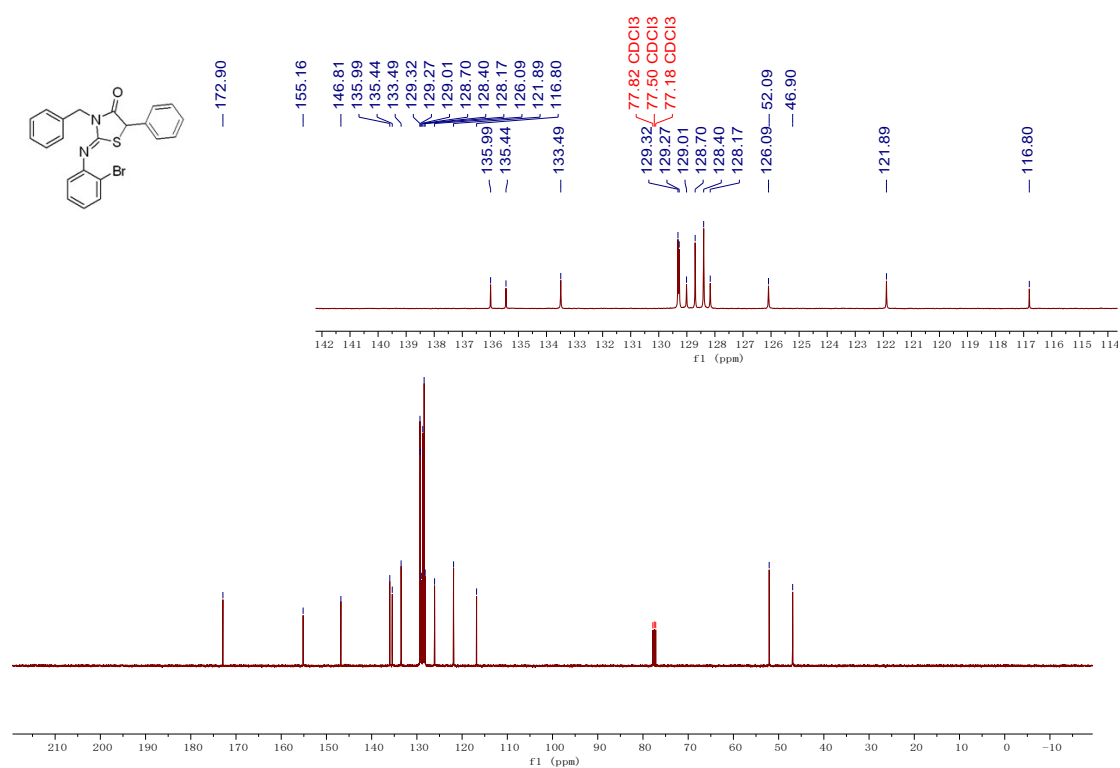

<sup>13</sup>C{<sup>1</sup>H} NMR of 4m in CDCl<sub>3</sub> (100 MHz)

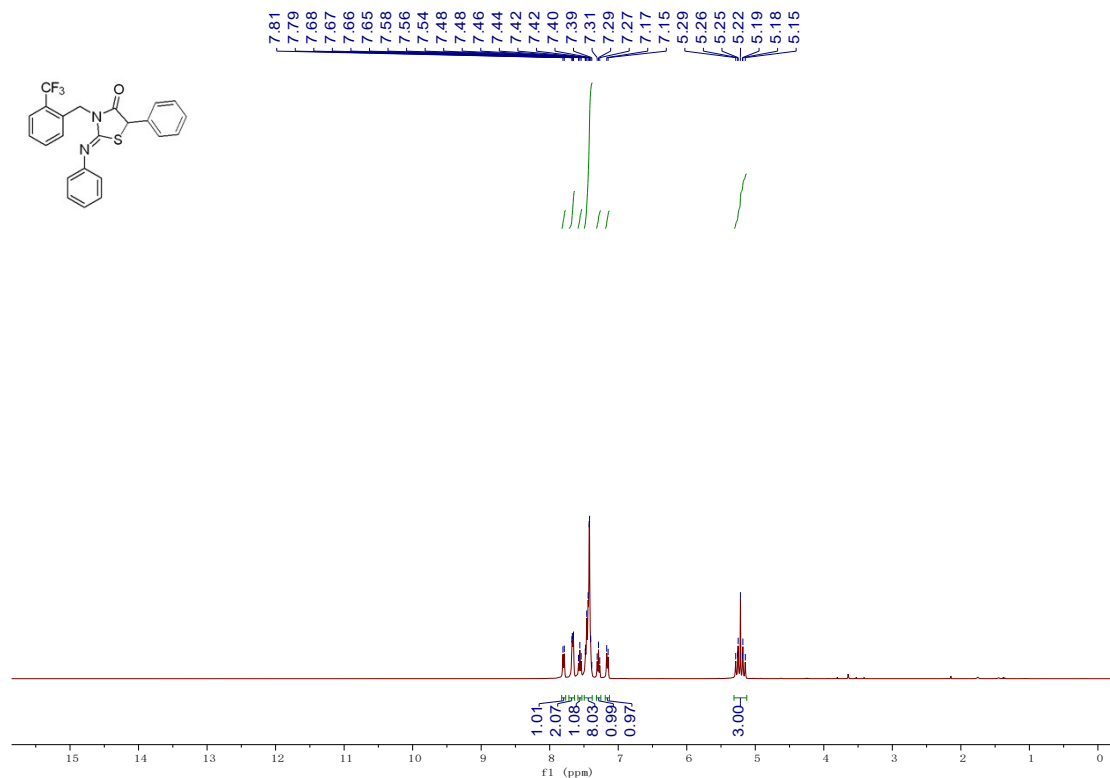

**<sup>1</sup>H NMR of 4n in CDCl<sub>3</sub> (400 MHz)**

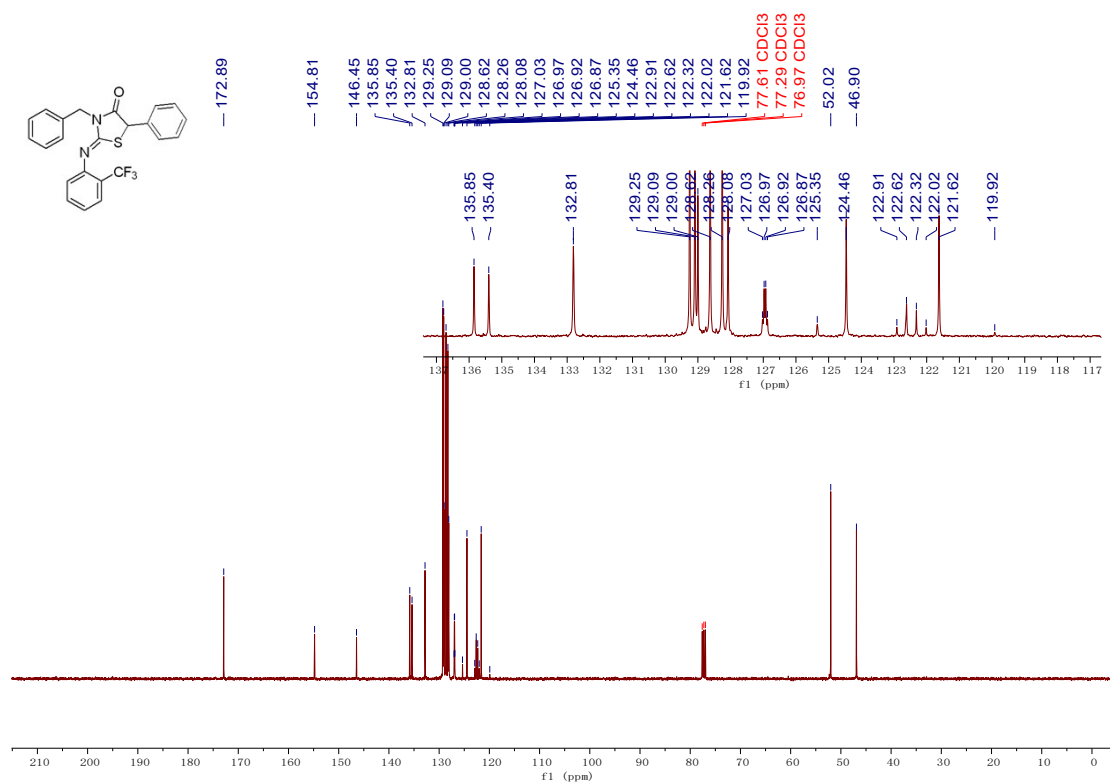

**<sup>13</sup>C{<sup>1</sup>H} NMR of 4n in CDCl<sub>3</sub> (100 MHz)**

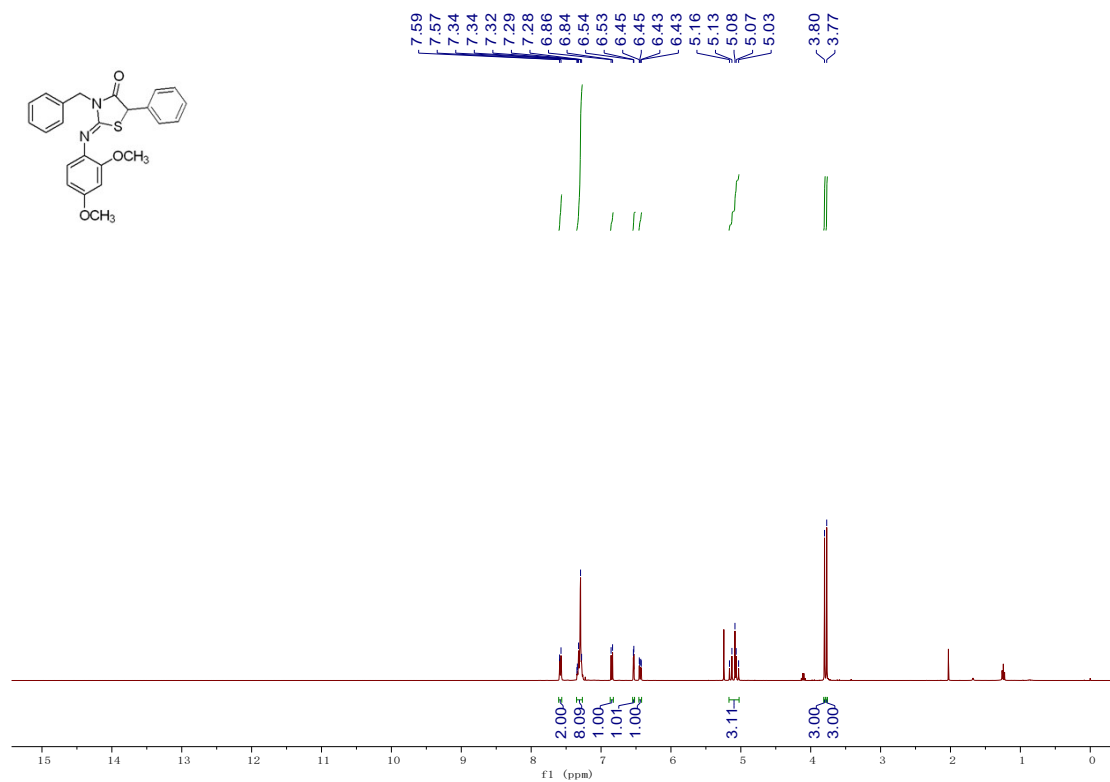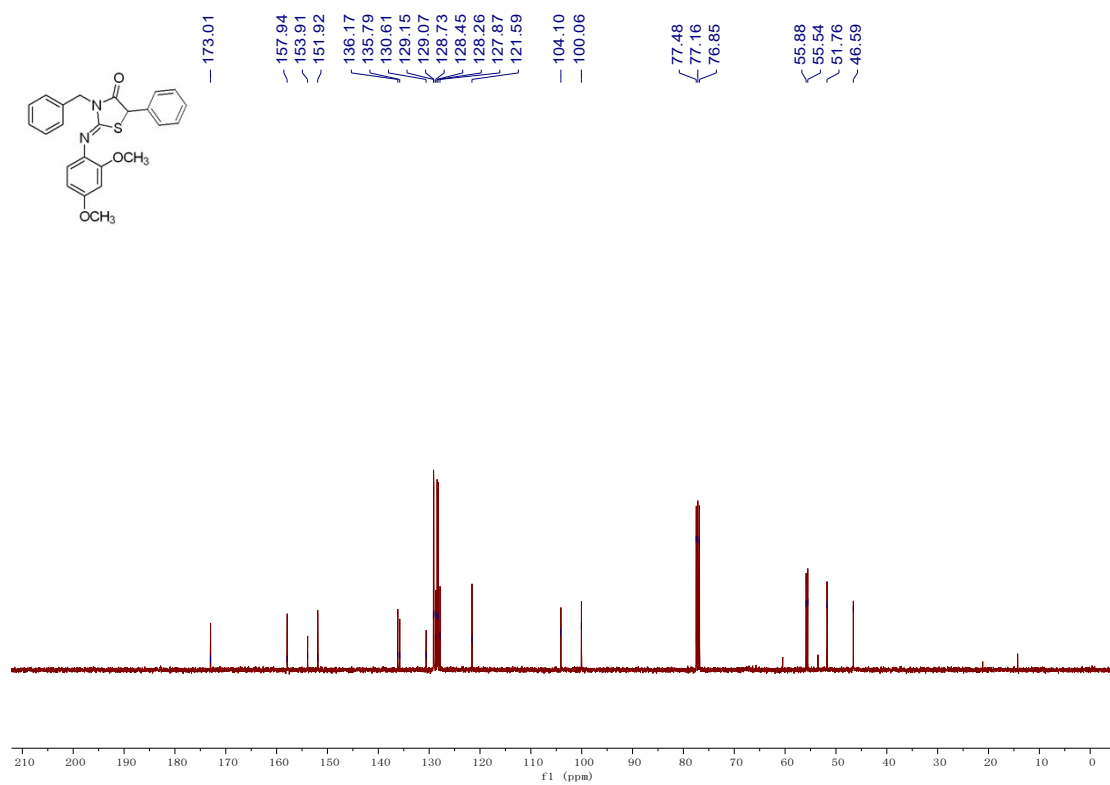

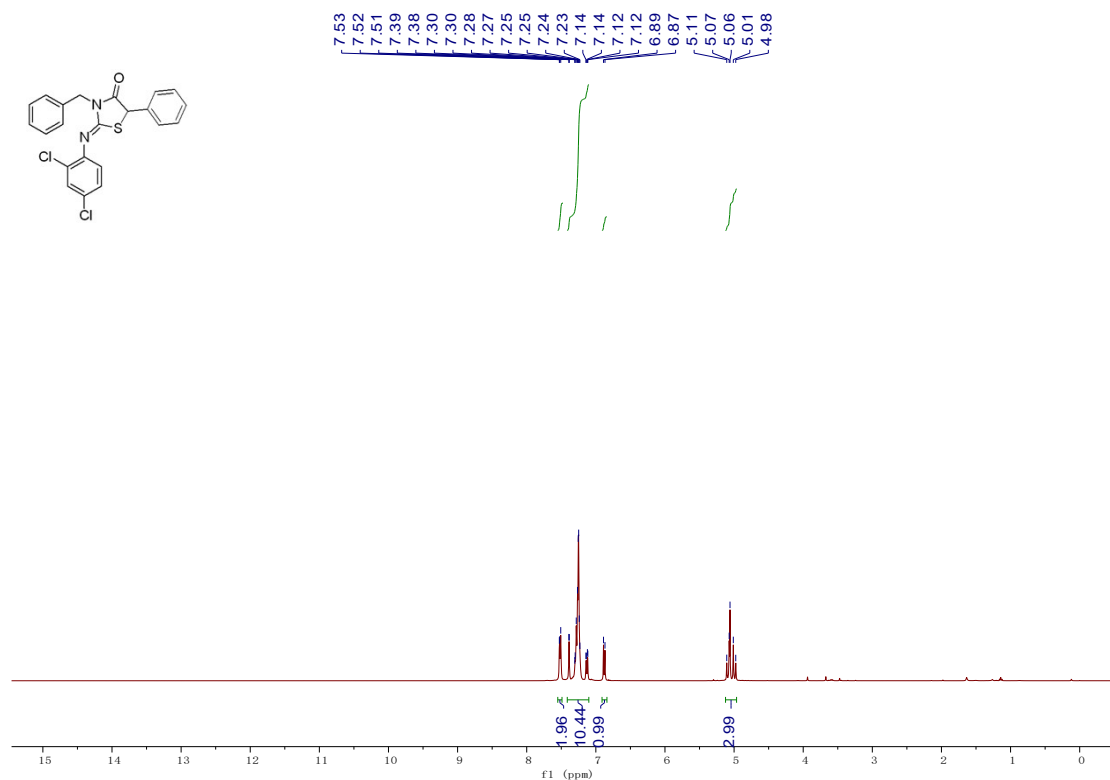

<sup>1</sup>H NMR of 4p in CDCl<sub>3</sub> (400 MHz)

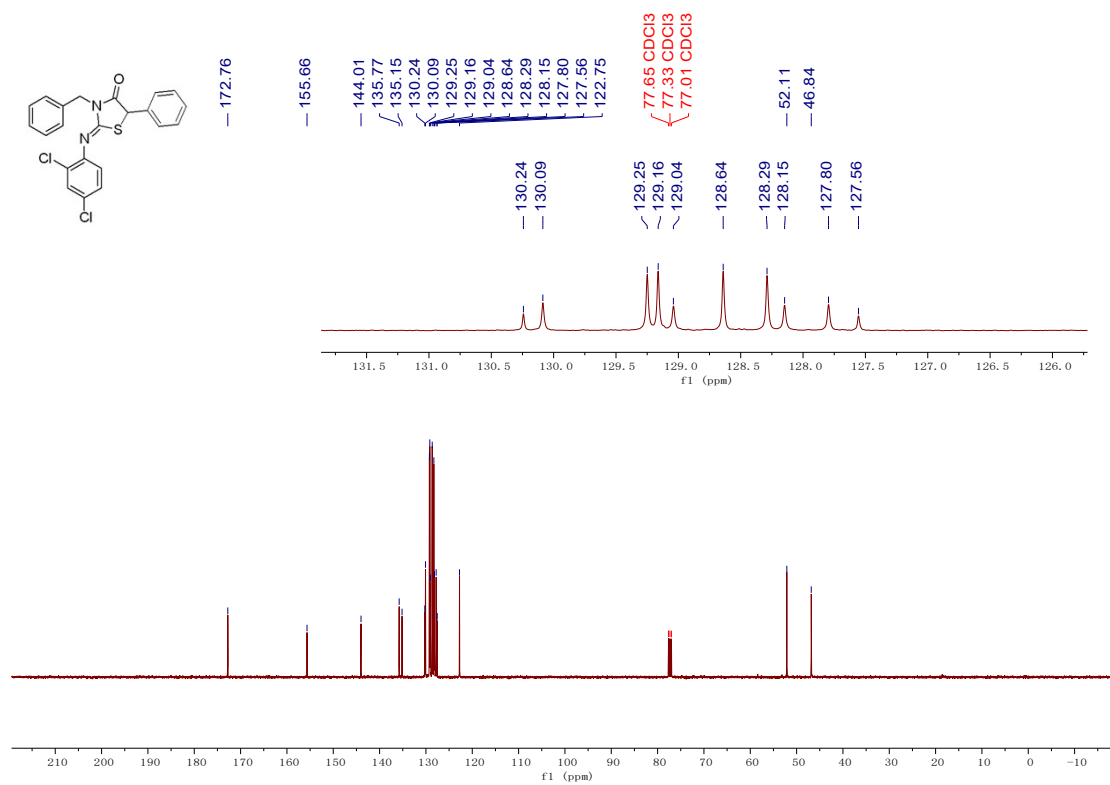

<sup>13</sup>C{<sup>1</sup>H} NMR of 4p in CDCl<sub>3</sub> (100 MHz)

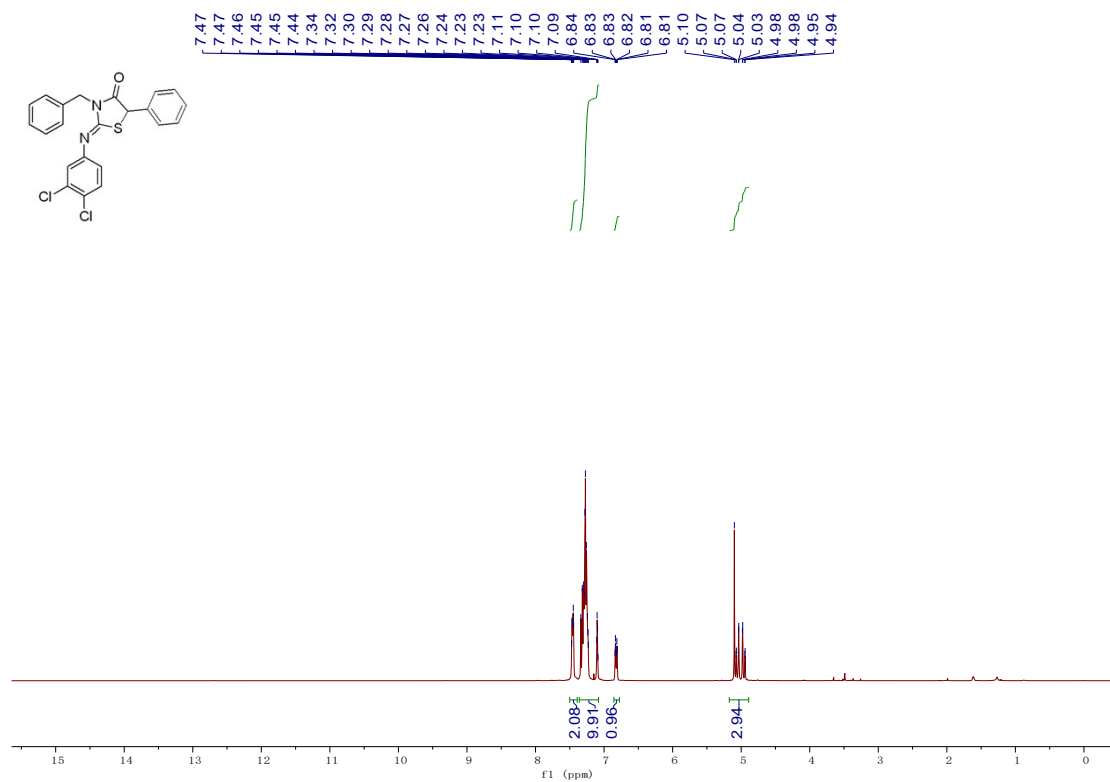

**<sup>1</sup>H NMR of 4q in CDCl<sub>3</sub> (400 MHz)**

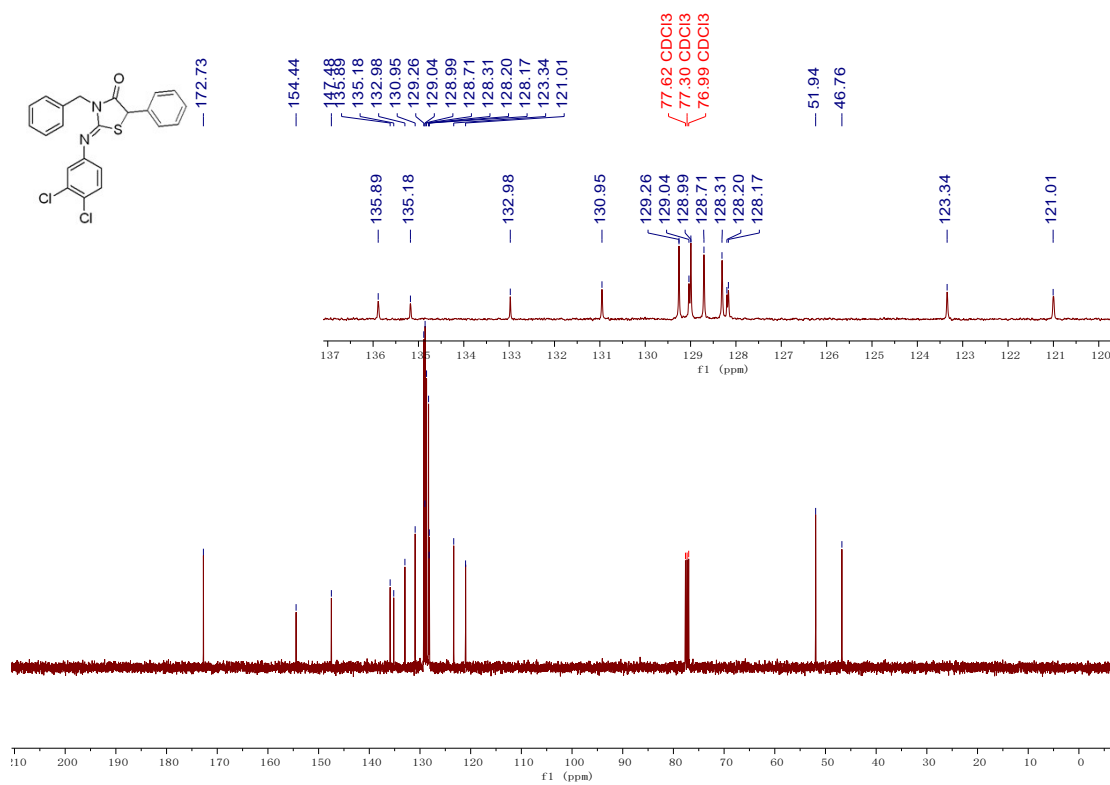

**<sup>13</sup>C{<sup>1</sup>H} NMR of 4q in CDCl<sub>3</sub> (100 MHz)**

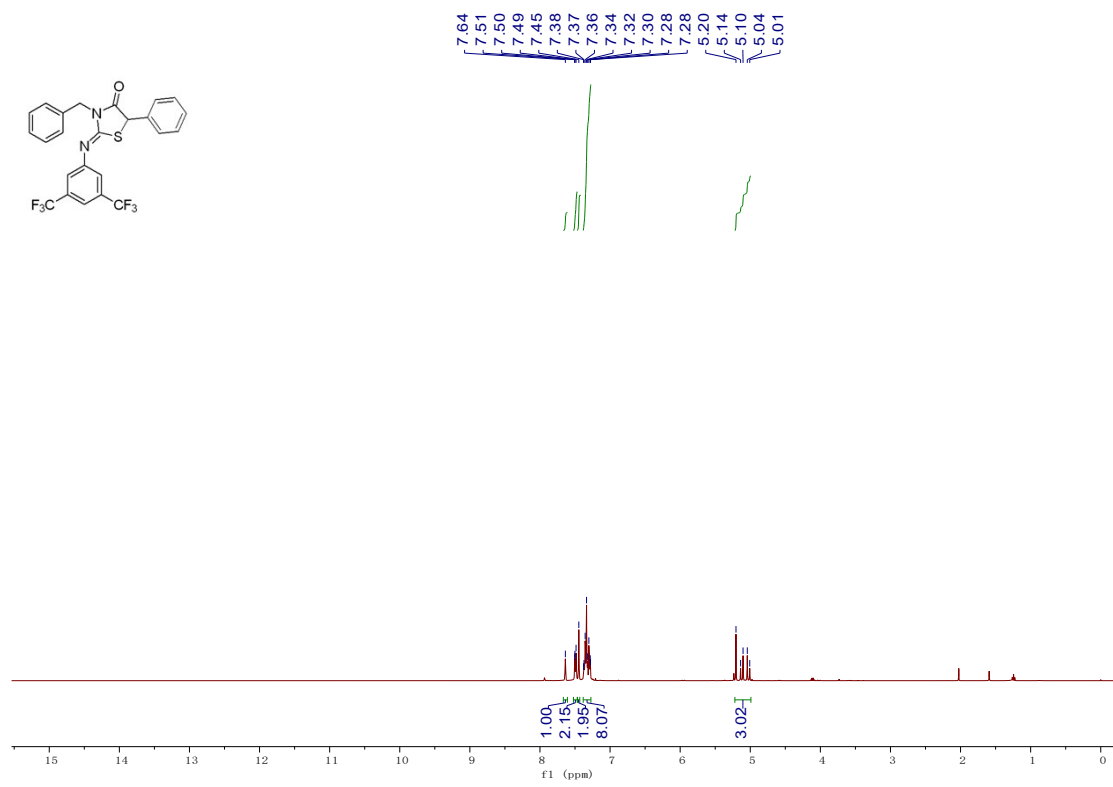

**<sup>1</sup>H NMR of 4r in CDCl<sub>3</sub> (400 MHz)**

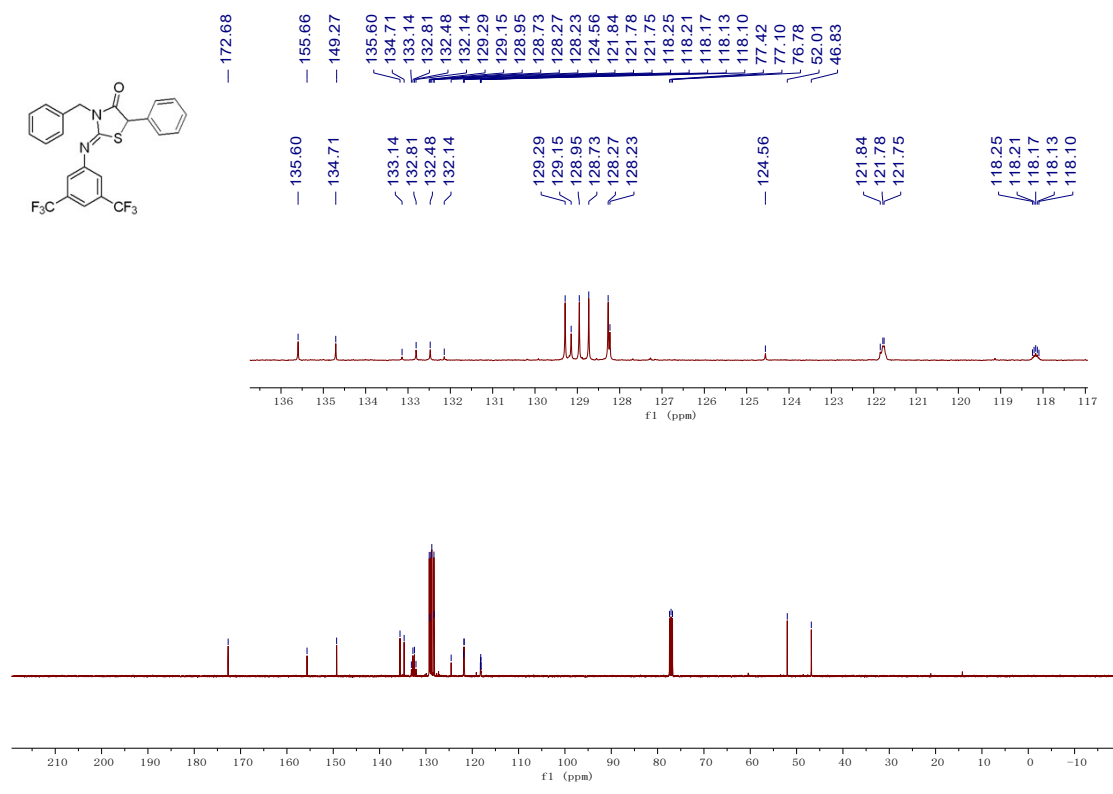

**<sup>13</sup>C{<sup>1</sup>H} NMR of 4r in CDCl<sub>3</sub> (100 MHz)**

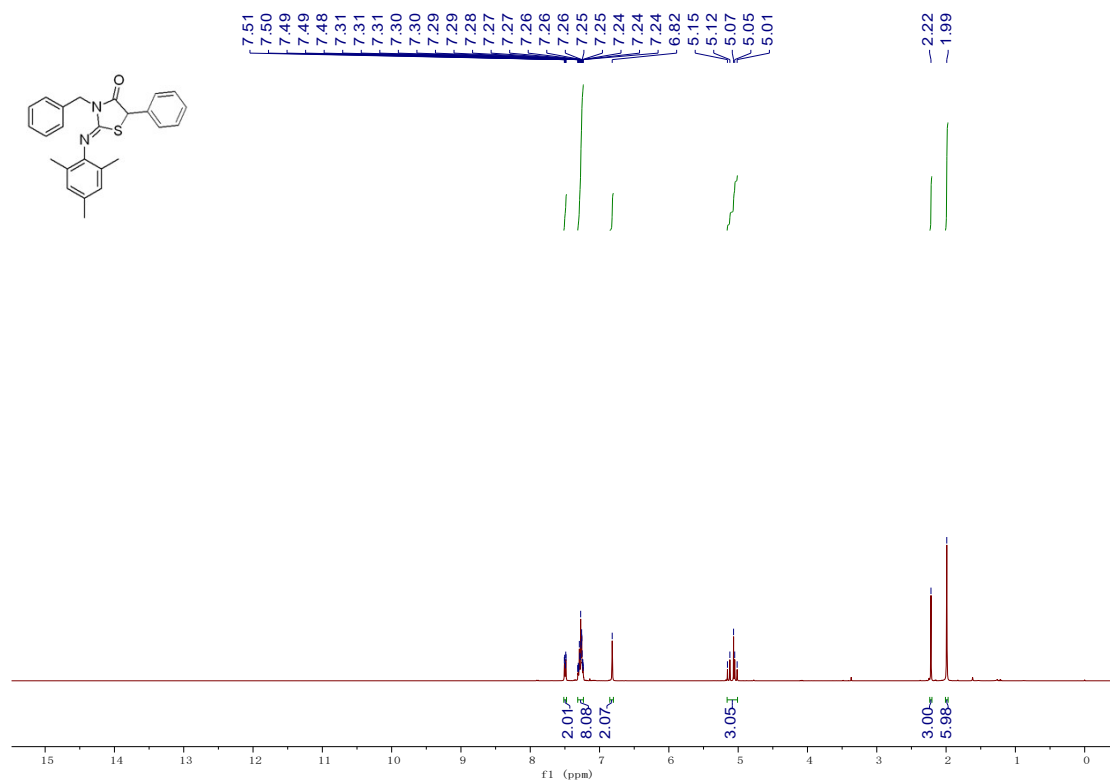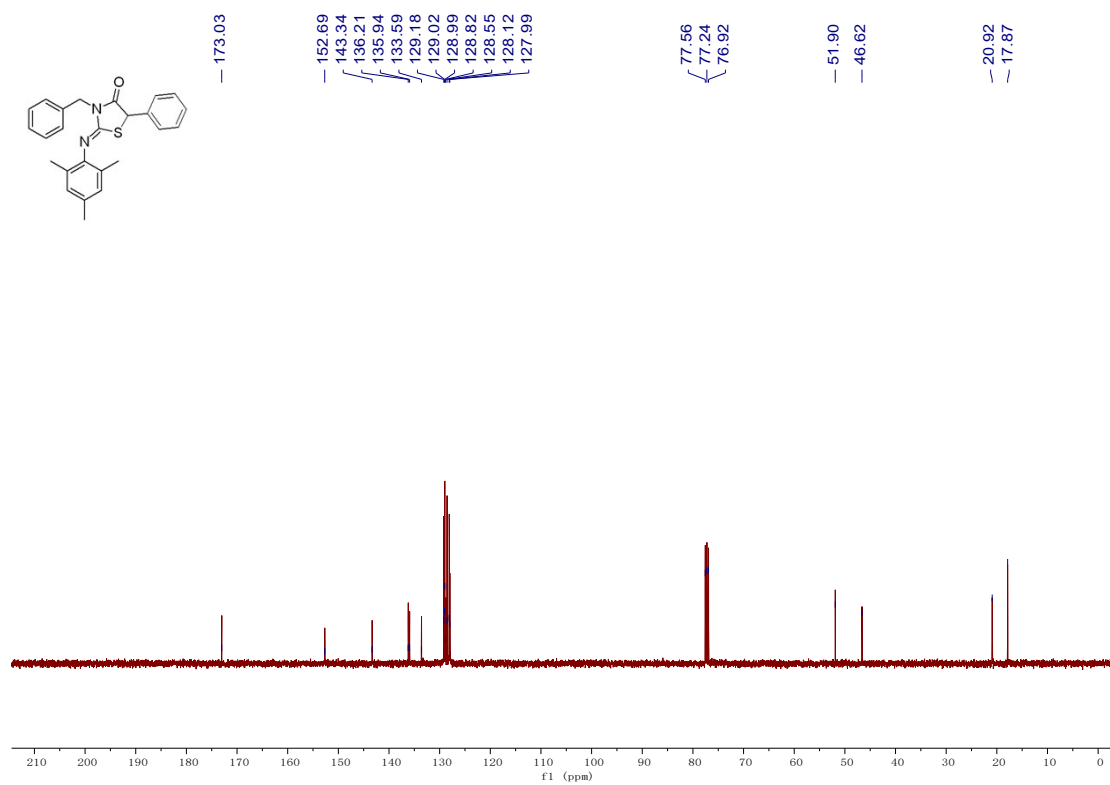



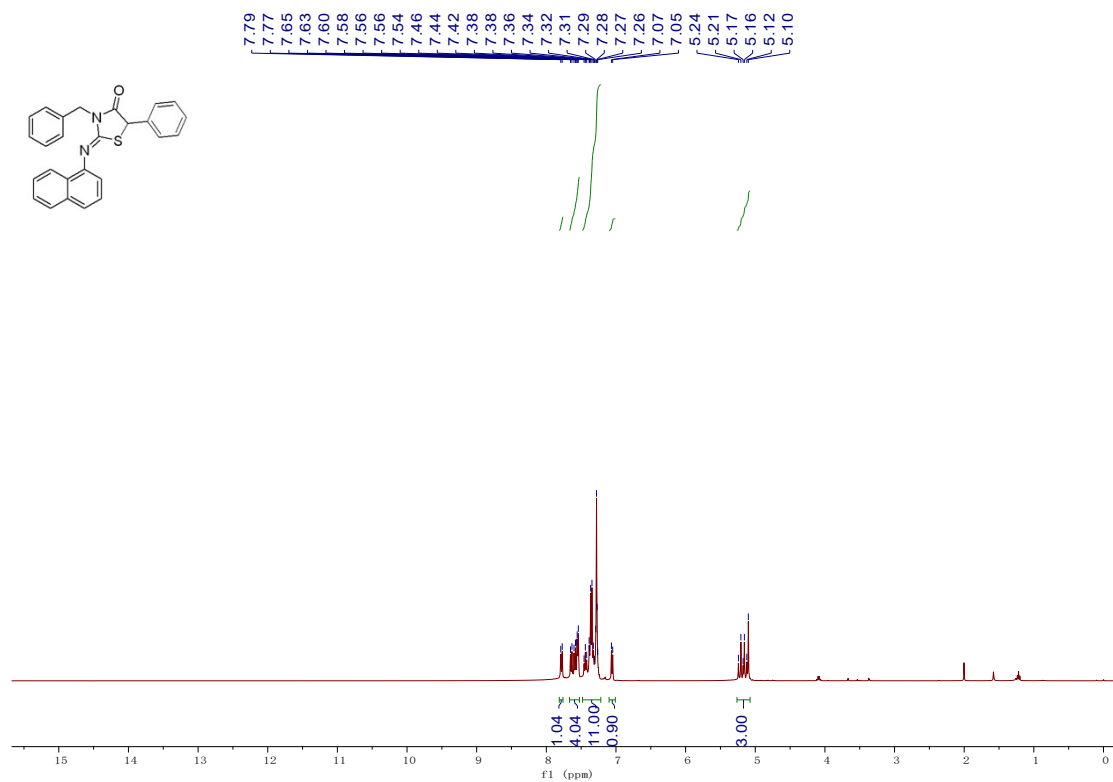

**<sup>1</sup>H NMR of 4t in CDCl<sub>3</sub> (400 MHz)**

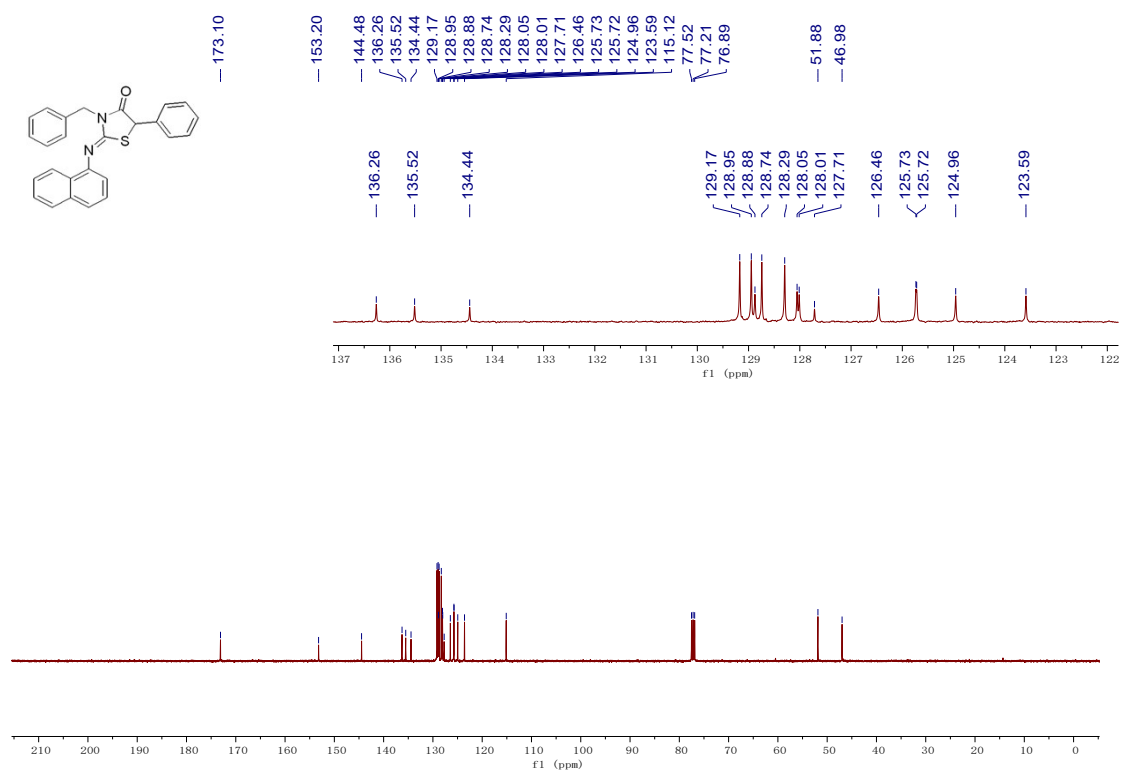

**<sup>13</sup>C{<sup>1</sup>H} NMR of 4t in CDCl<sub>3</sub> (100 MHz)**

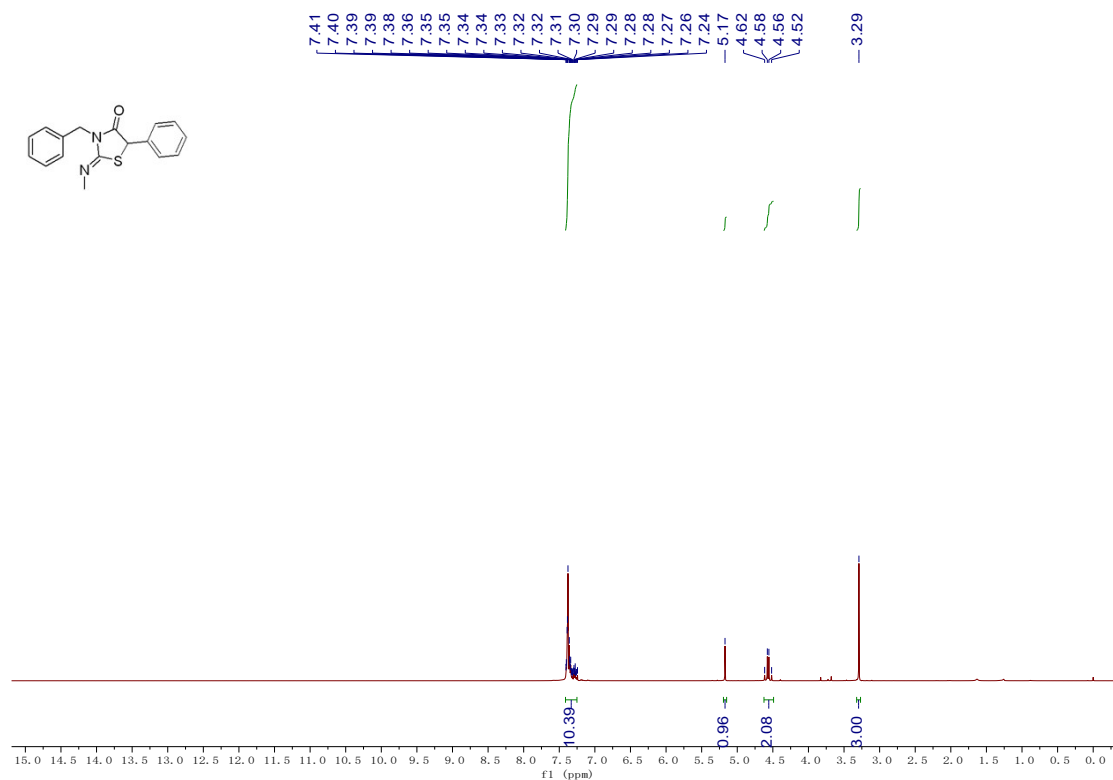

$^1\text{H}$  NMR of 4u in  $\text{CDCl}_3$  (400 MHz)

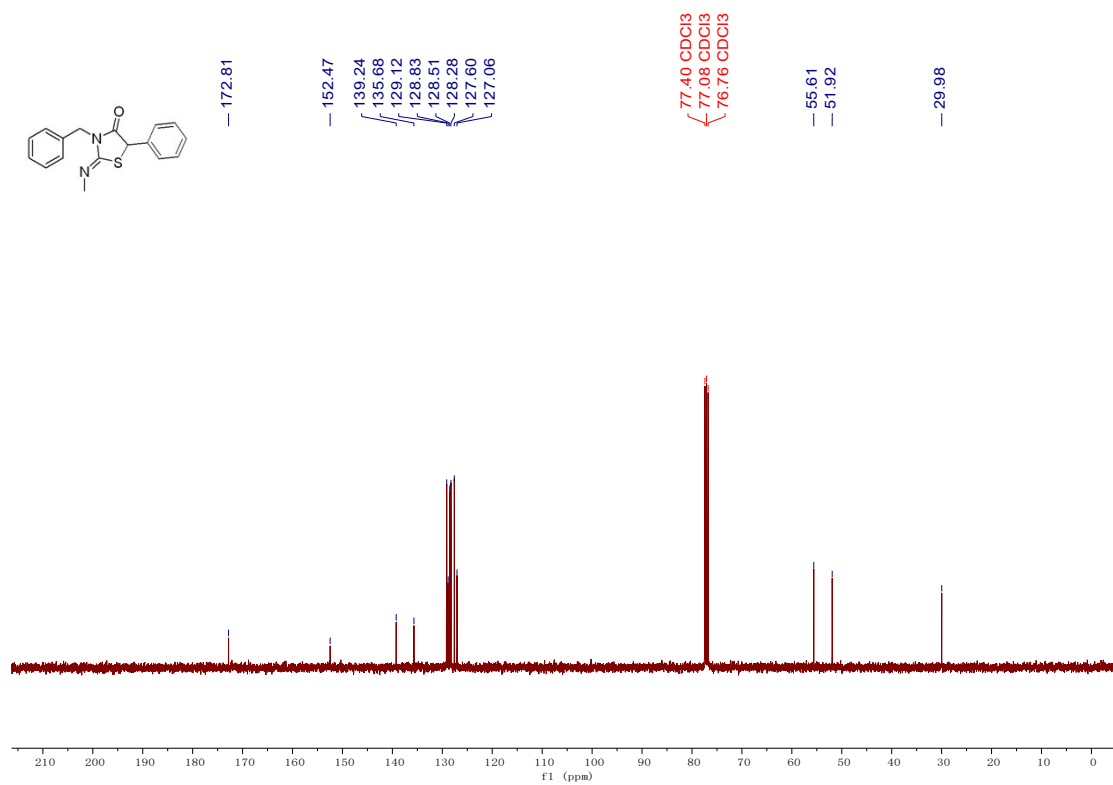

$^{13}\text{C}\{^1\text{H}\}$  NMR of 4u in  $\text{CDCl}_3$  (100 MHz)

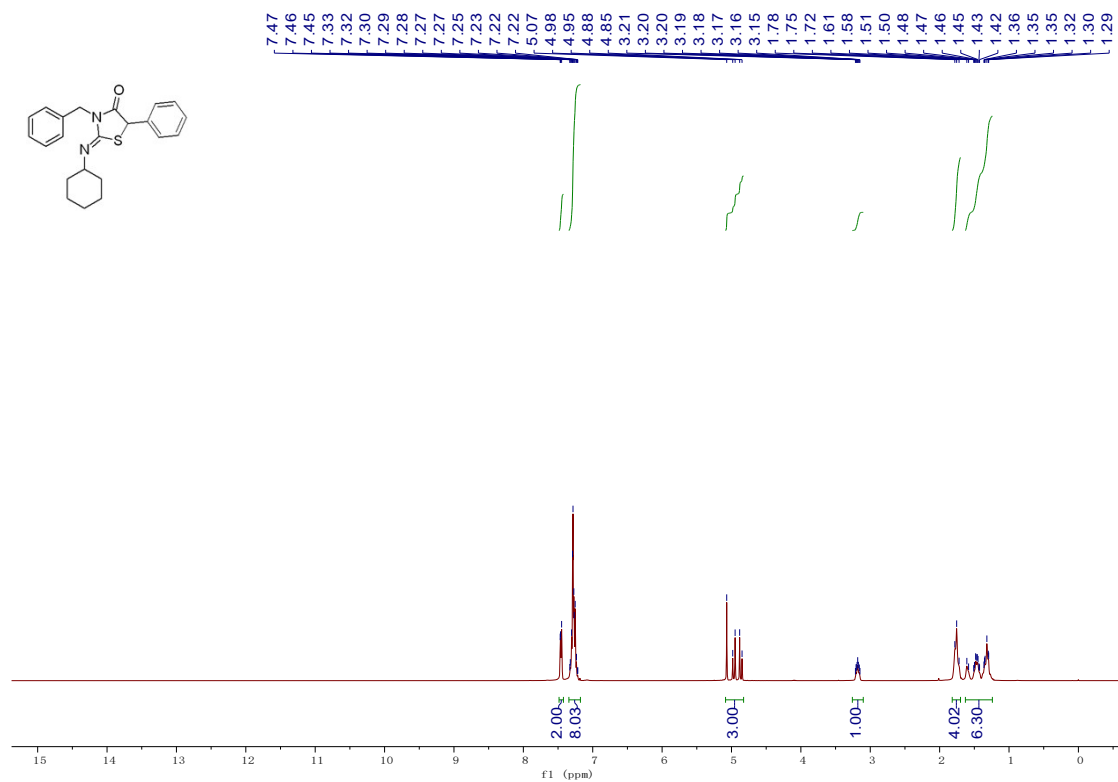

**<sup>1</sup>H NMR of 4v in CDCl<sub>3</sub> (400 MHz)**

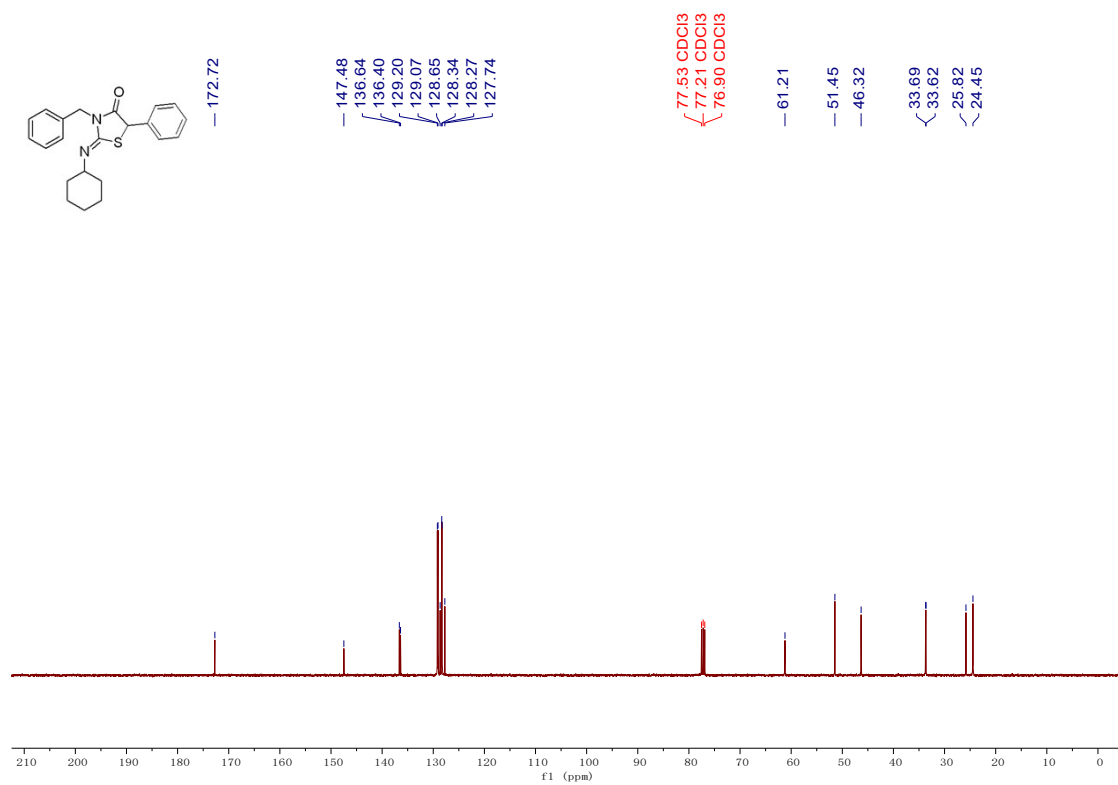

**<sup>13</sup>C{<sup>1</sup>H} NMR of 4v in CDCl<sub>3</sub> (100 MHz)**

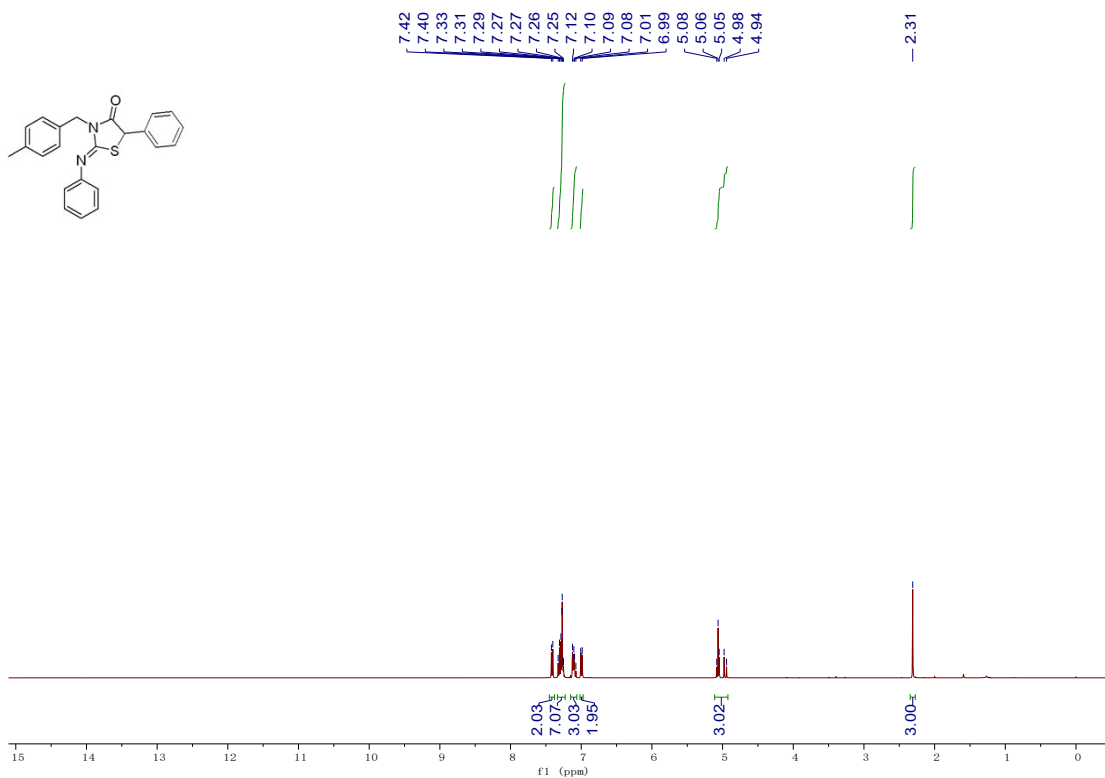

**<sup>1</sup>H NMR of 5a in CDCl<sub>3</sub> (400 MHz)**

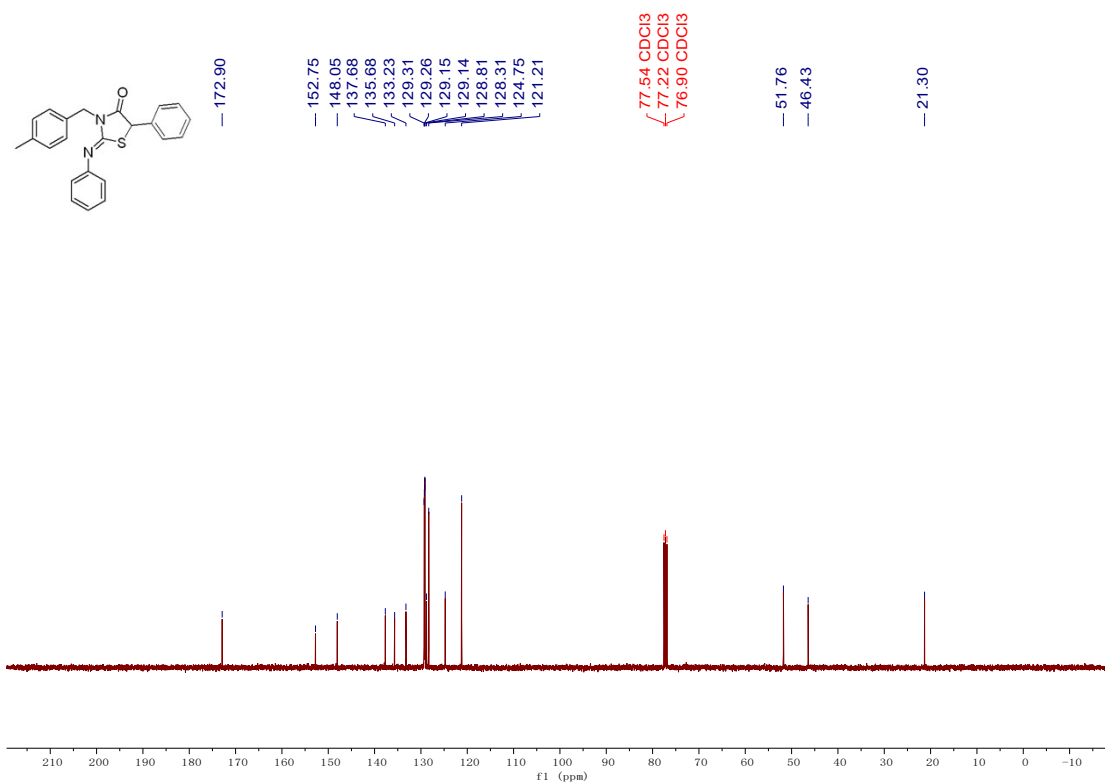

**<sup>13</sup>C{<sup>1</sup>H} NMR of 5a in CDCl<sub>3</sub> (100 MHz)**

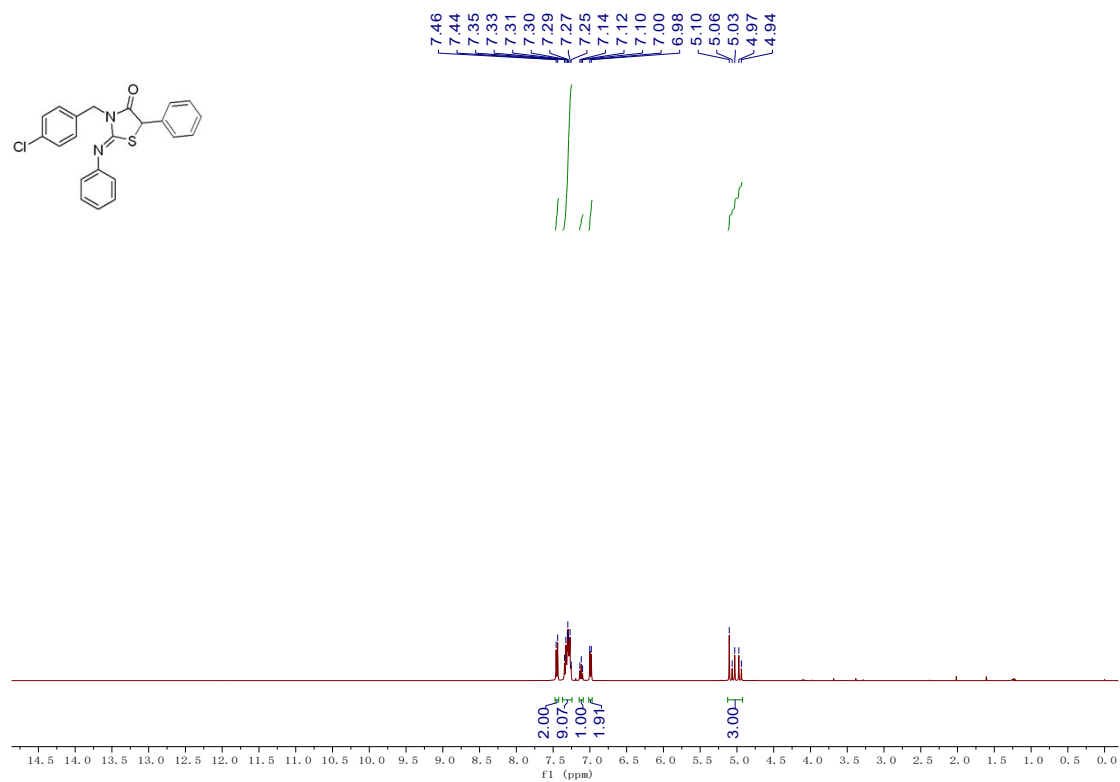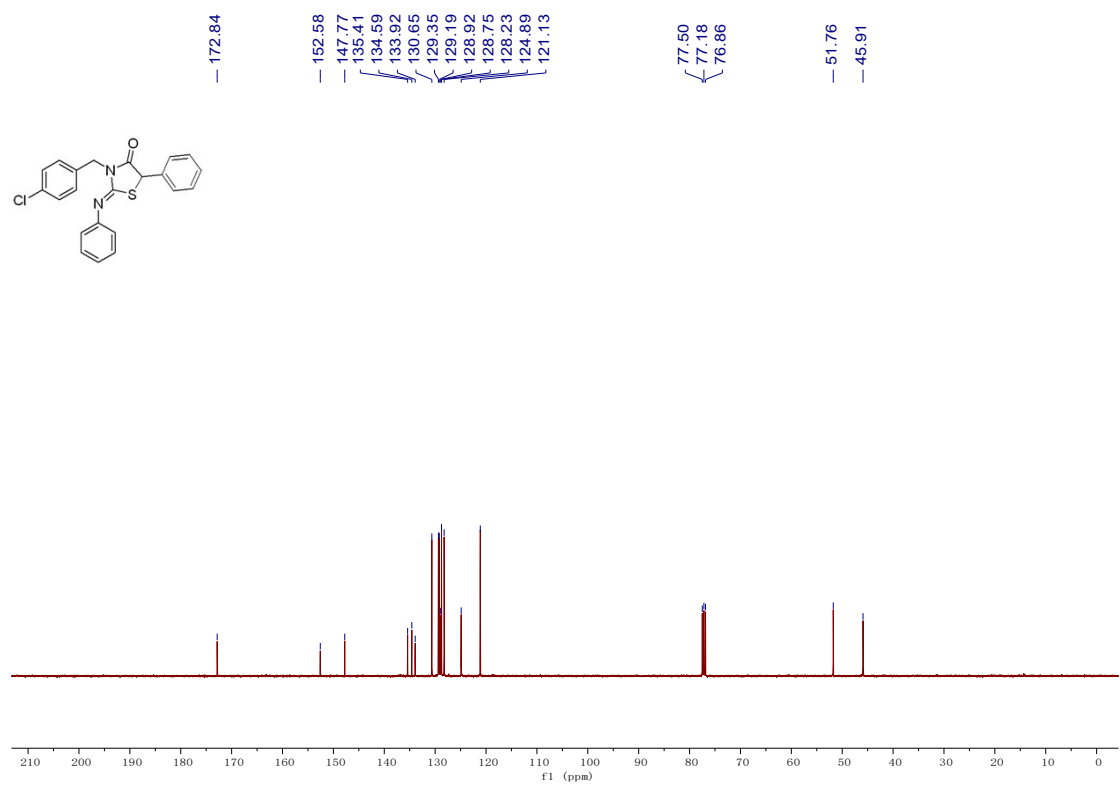

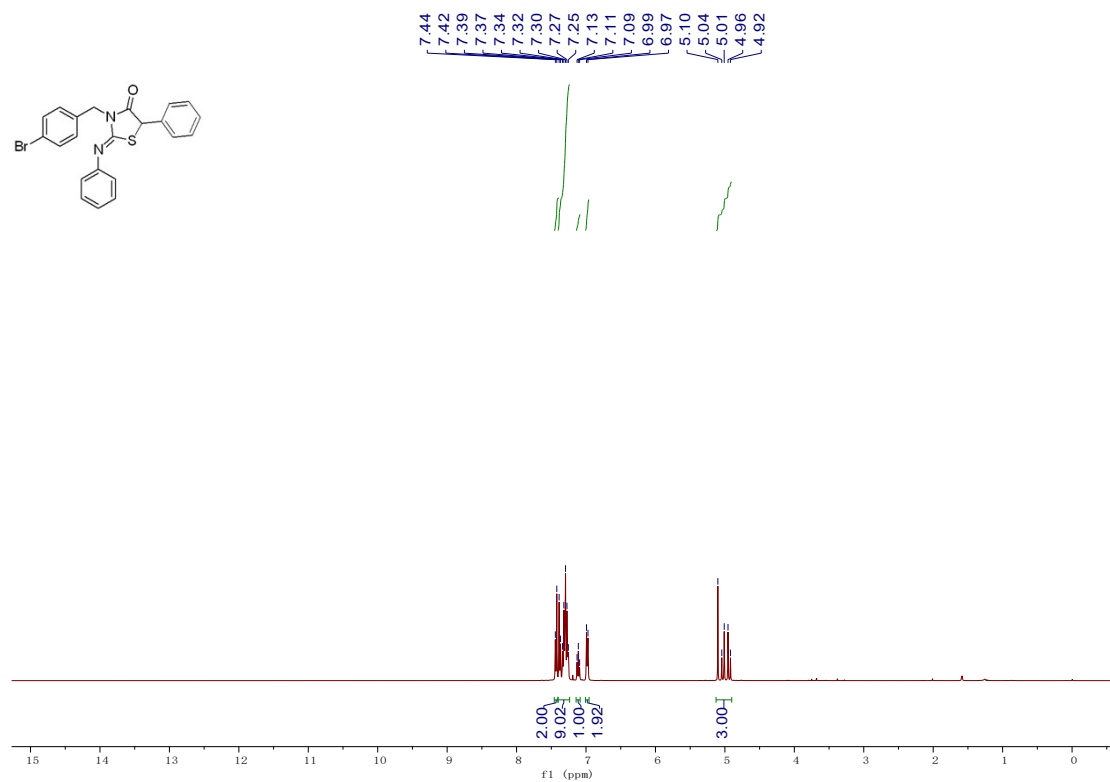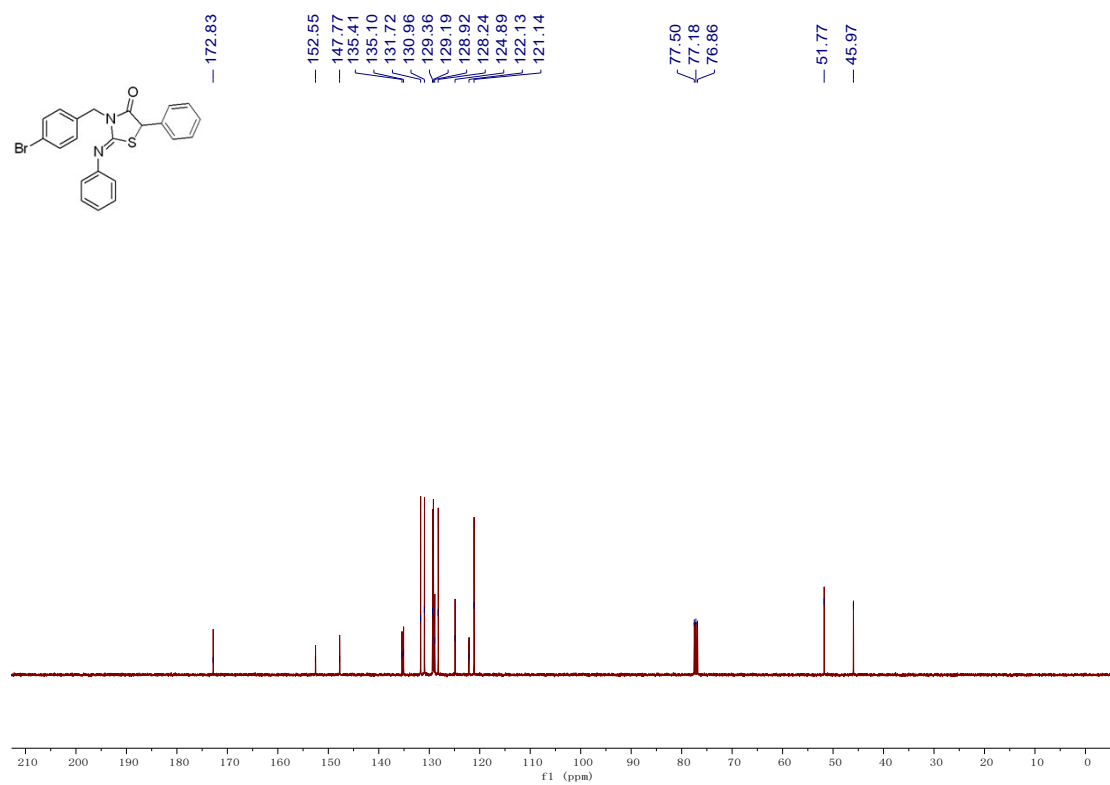

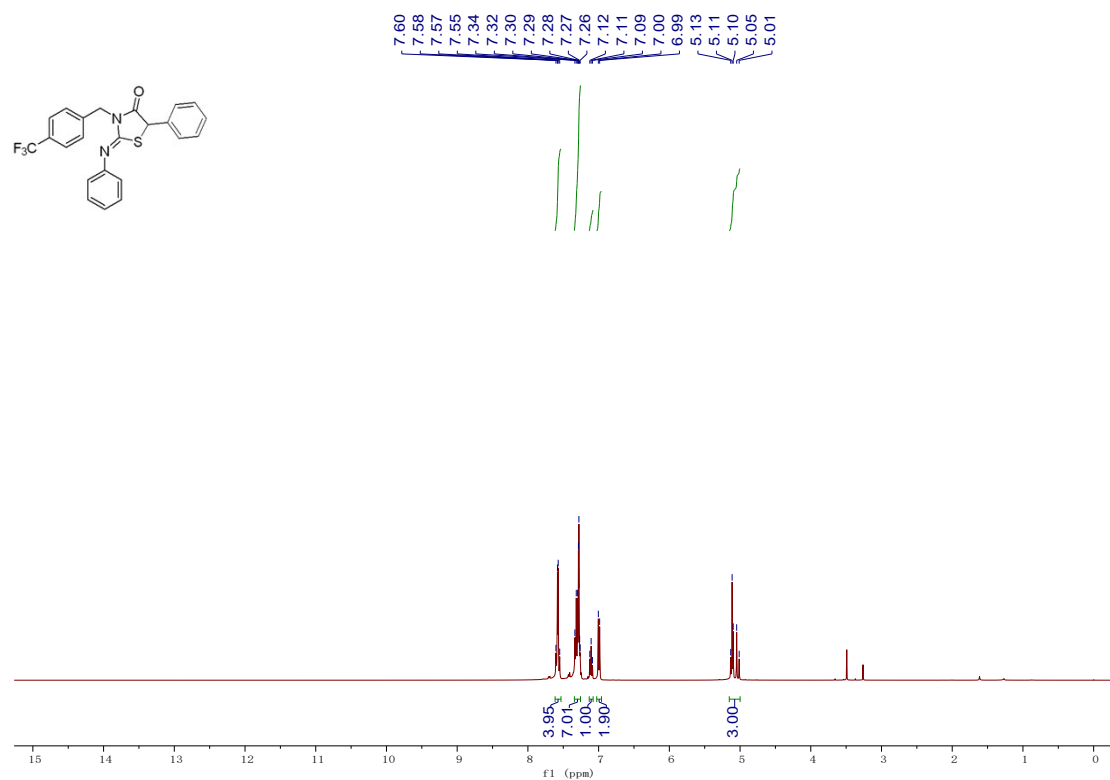

**<sup>1</sup>H NMR of 5d in CDCl<sub>3</sub> (400 MHz)**

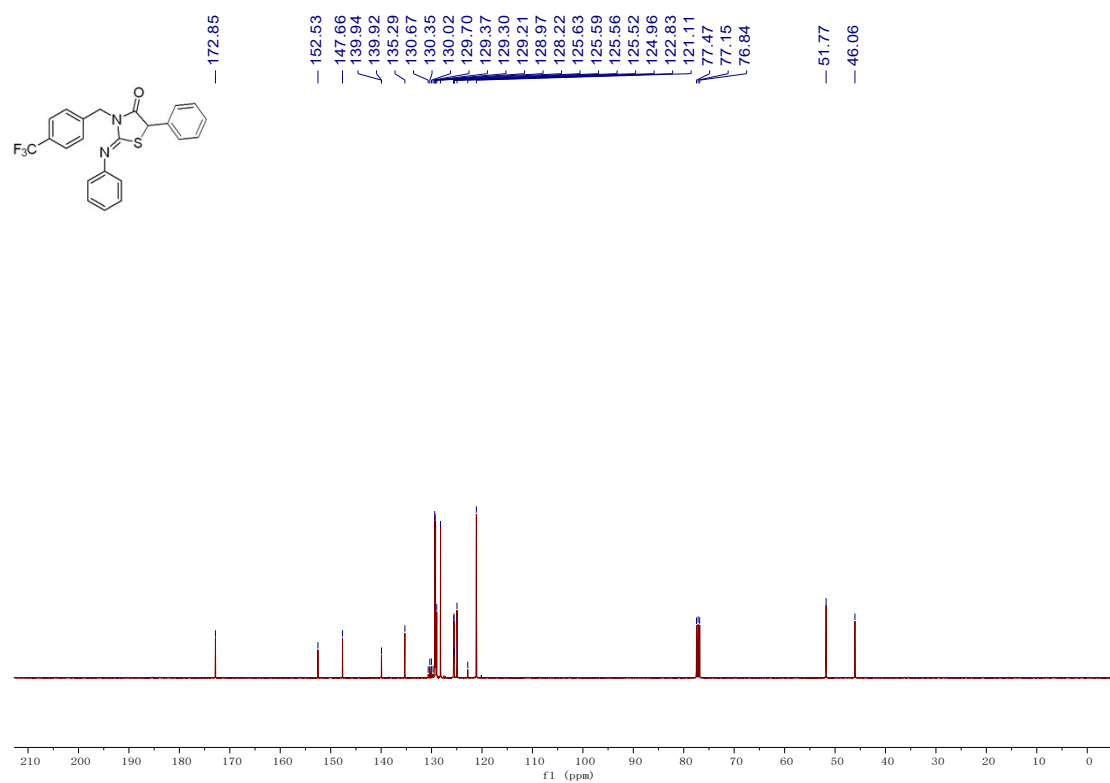

**<sup>13</sup>C{<sup>1</sup>H} NMR of 5d in CDCl<sub>3</sub> (100 MHz)**

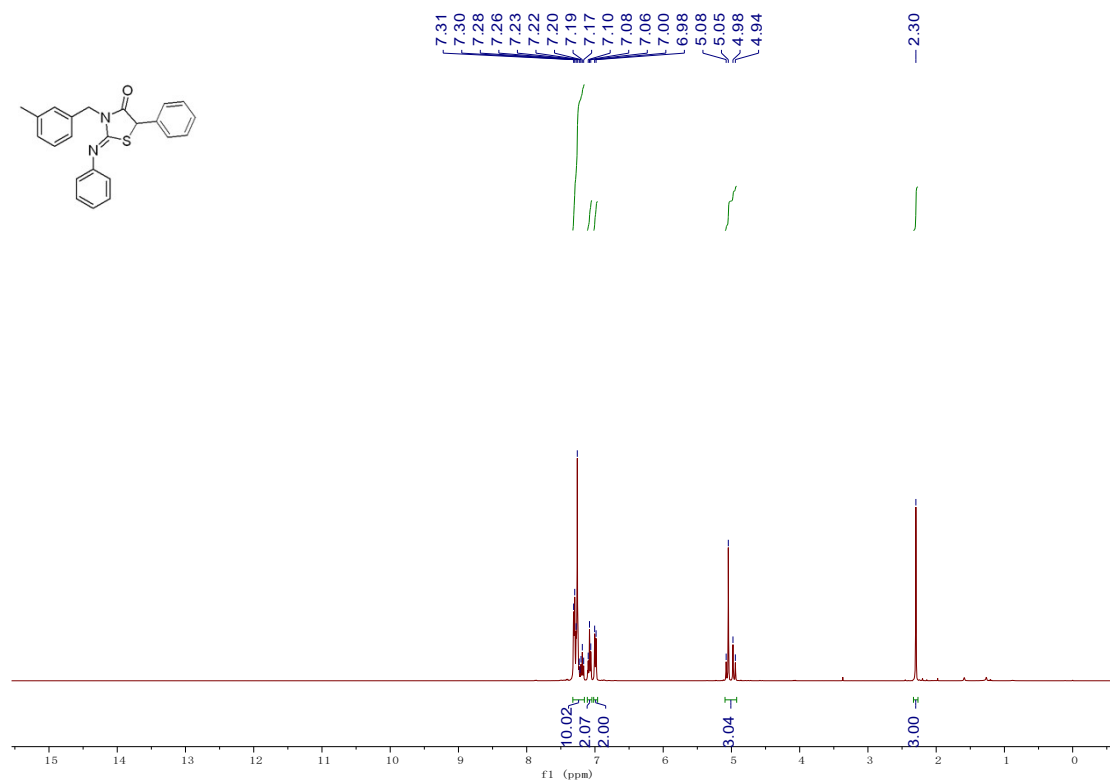

**<sup>1</sup>H NMR of 5e in CDCl<sub>3</sub> (400 MHz)**

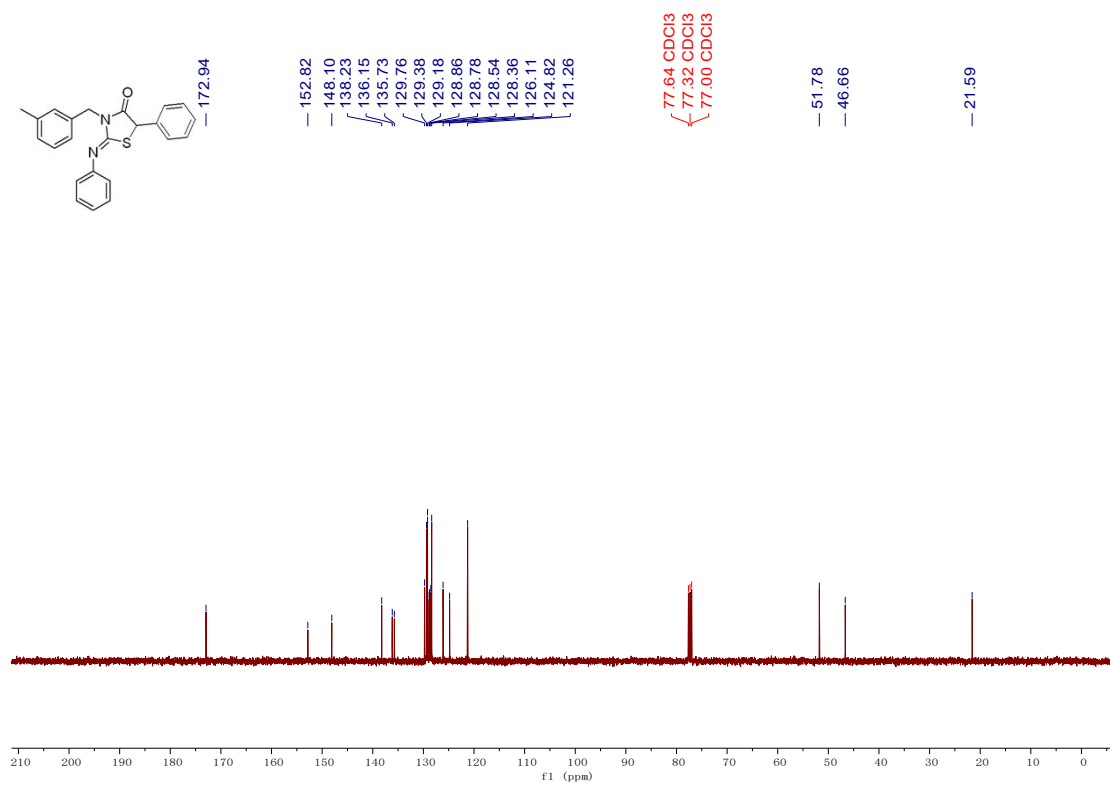

**<sup>13</sup>C{<sup>1</sup>H} NMR of 5e in CDCl<sub>3</sub> (100 MHz)**



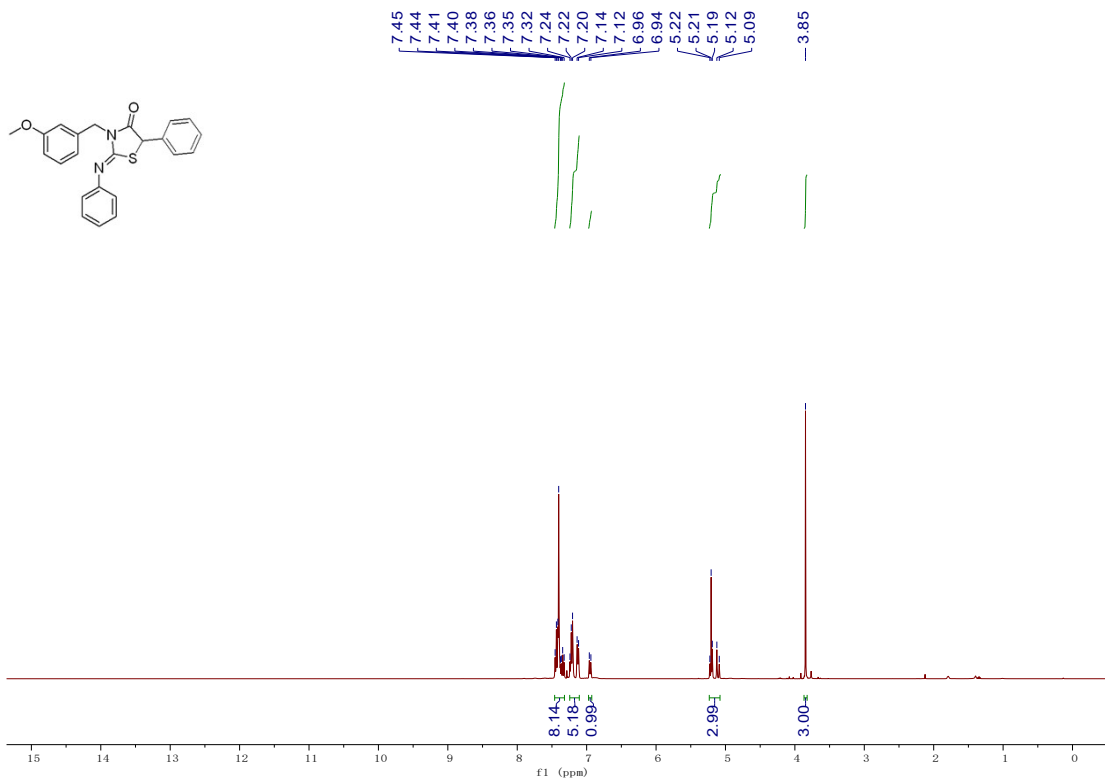

<sup>1</sup>H NMR of 5f in CDCl<sub>3</sub> (400 MHz)

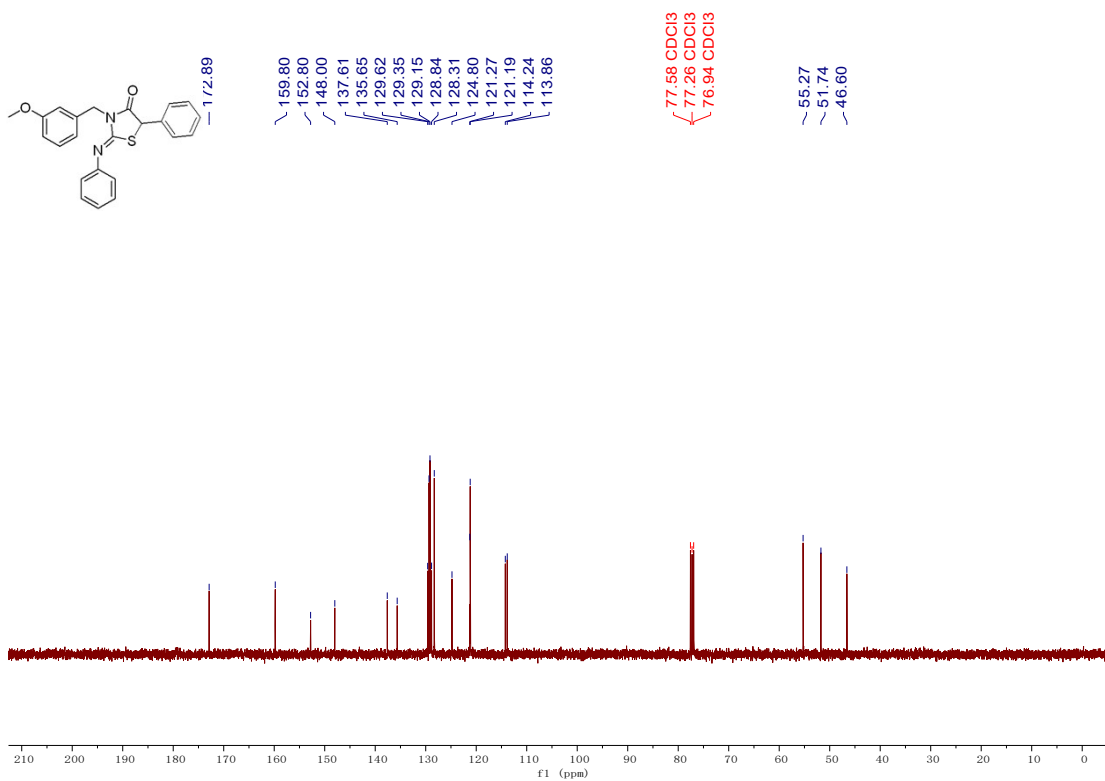

<sup>13</sup>C{<sup>1</sup>H} NMR of 5f in CDCl<sub>3</sub> (100 MHz)

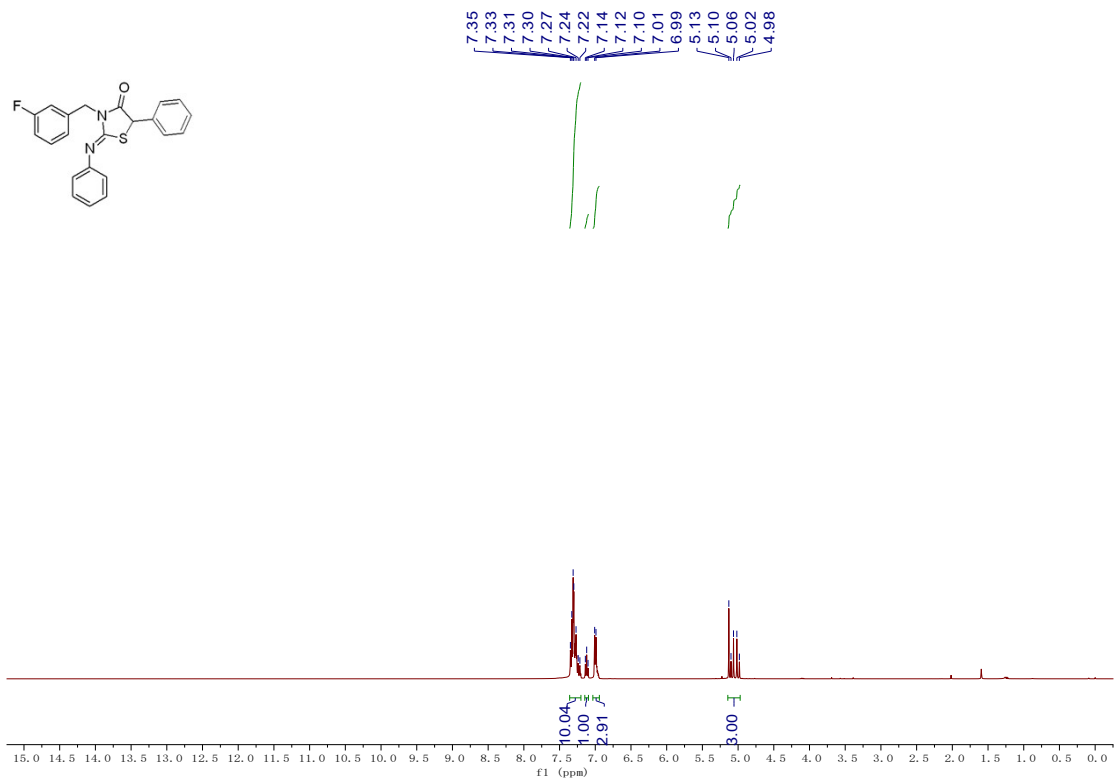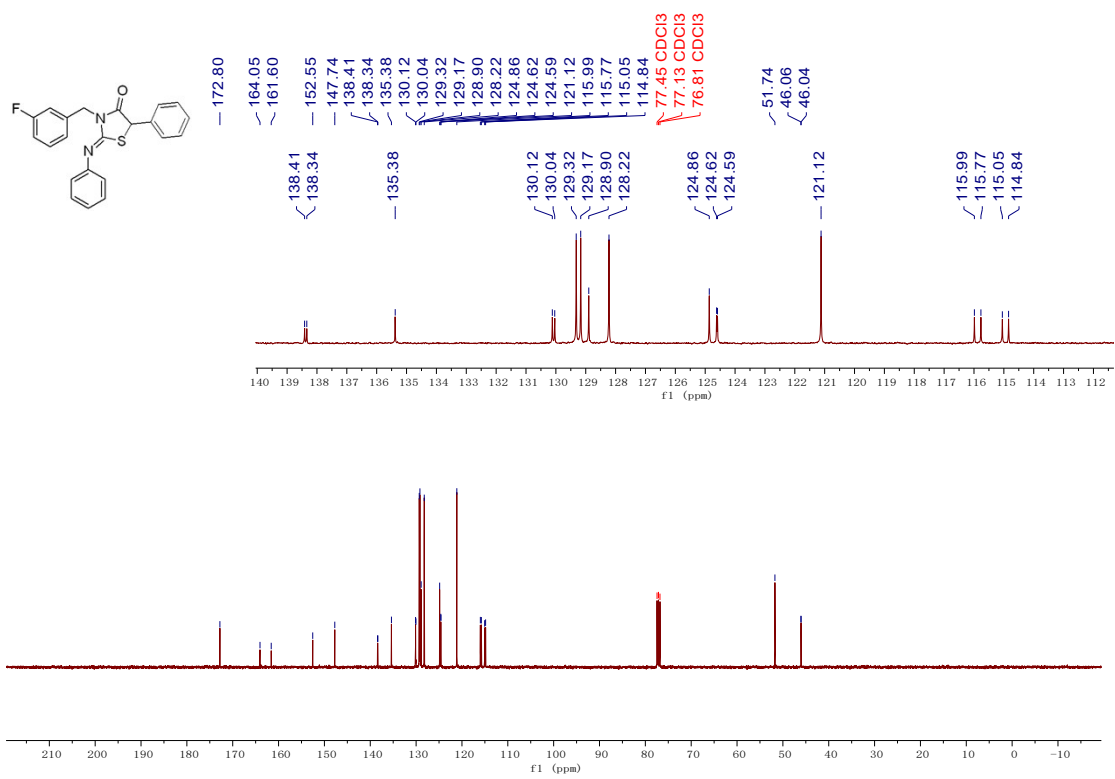

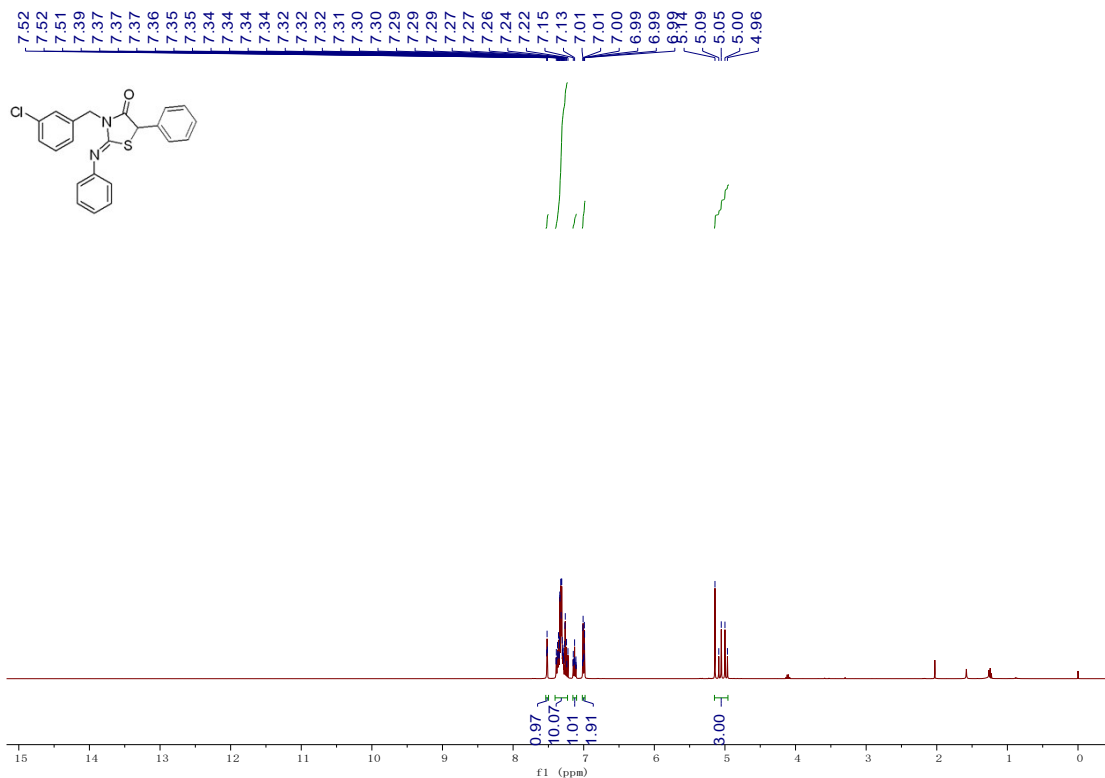

**<sup>1</sup>H NMR of 5h in CDCl<sub>3</sub> (400 MHz)**

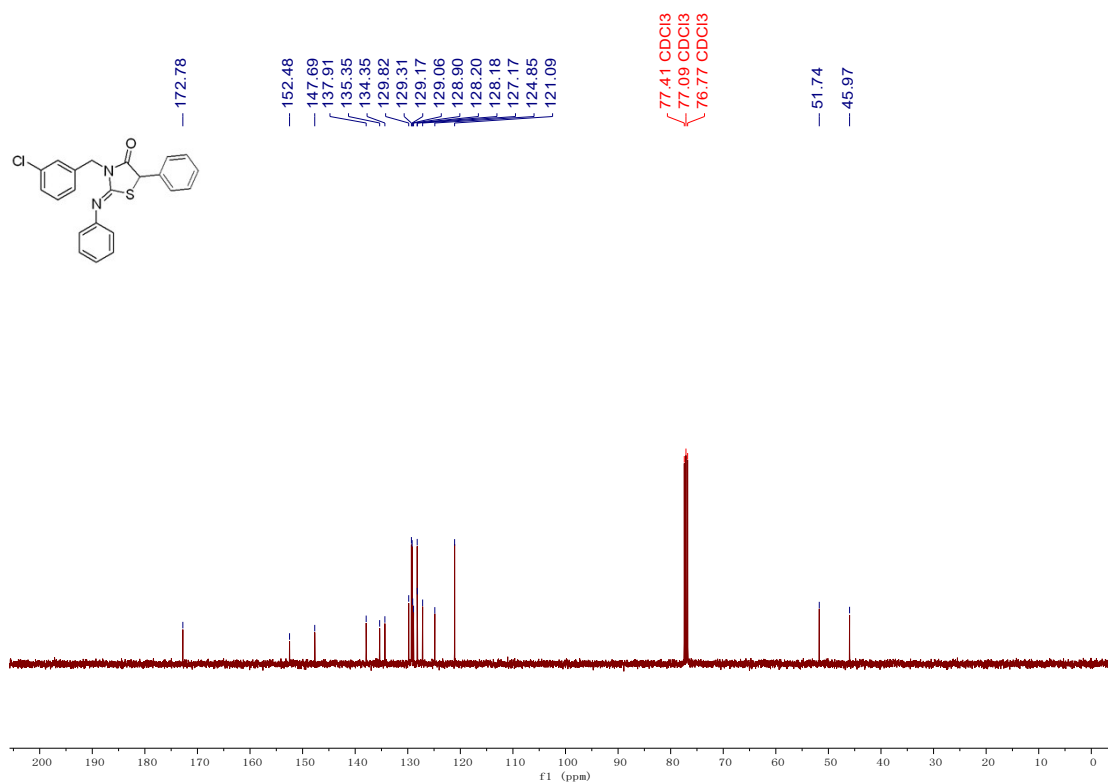

**<sup>13</sup>C{<sup>1</sup>H} NMR of 5h in CDCl<sub>3</sub> (100 MHz)**

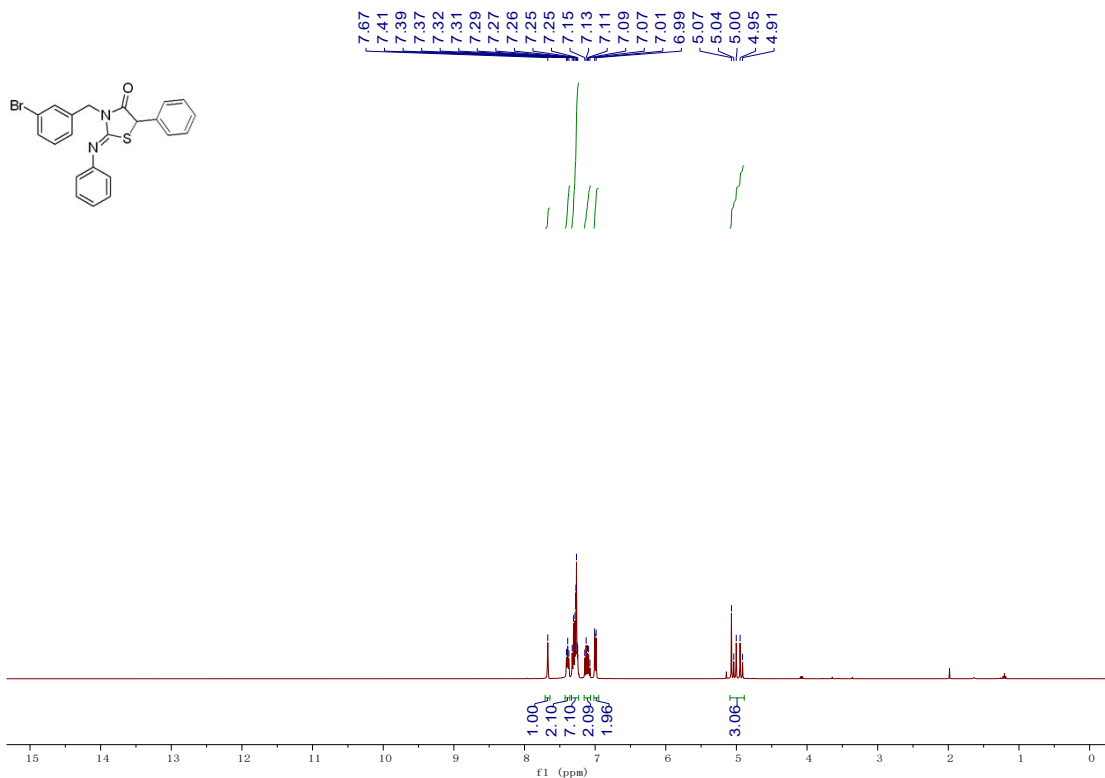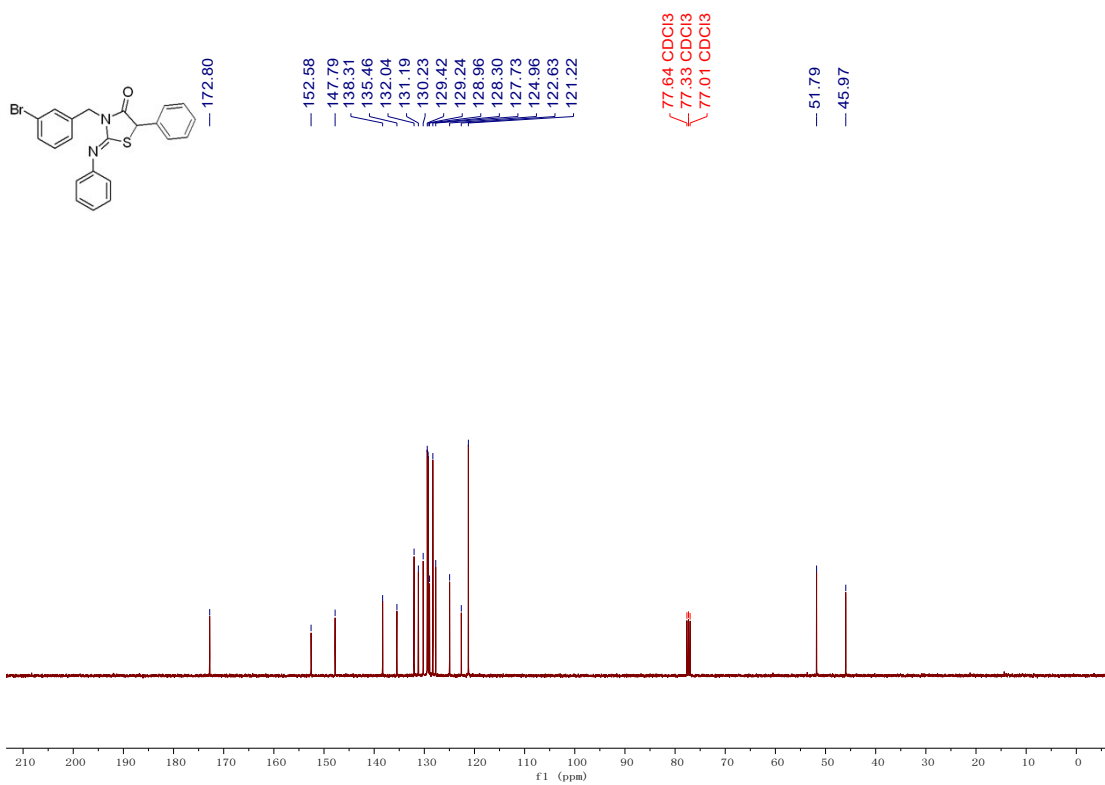

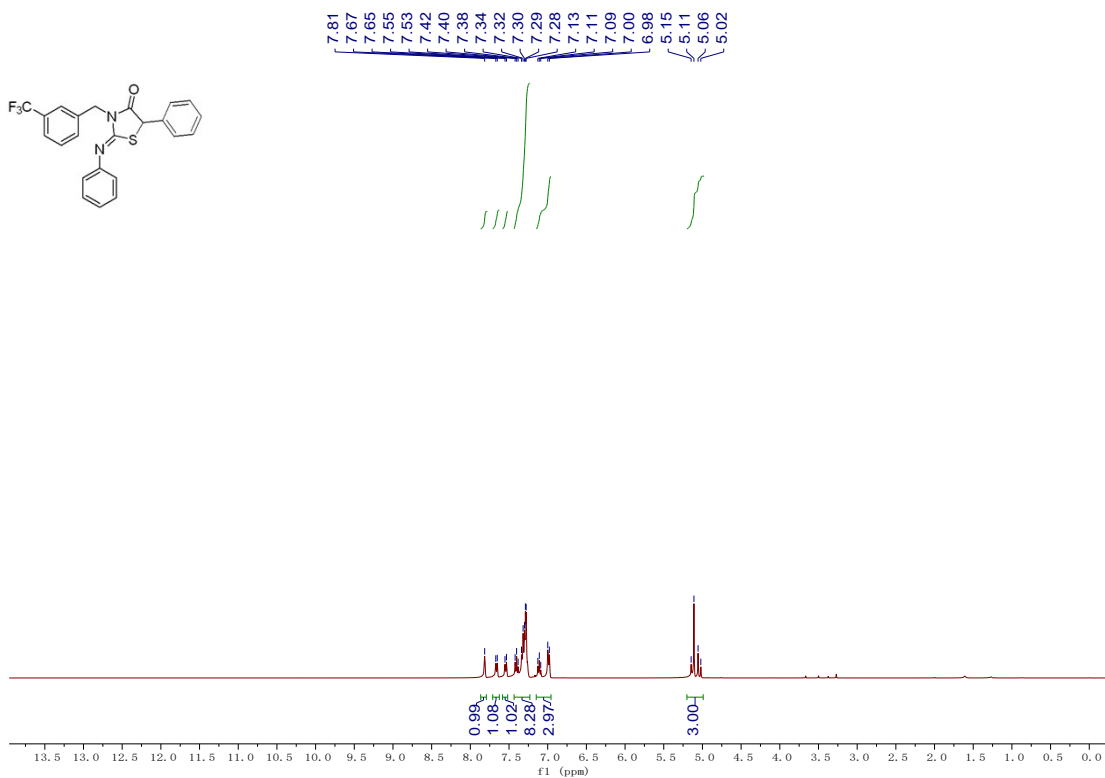

**<sup>1</sup>H NMR of 5j in CDCl<sub>3</sub> (400 MHz)**

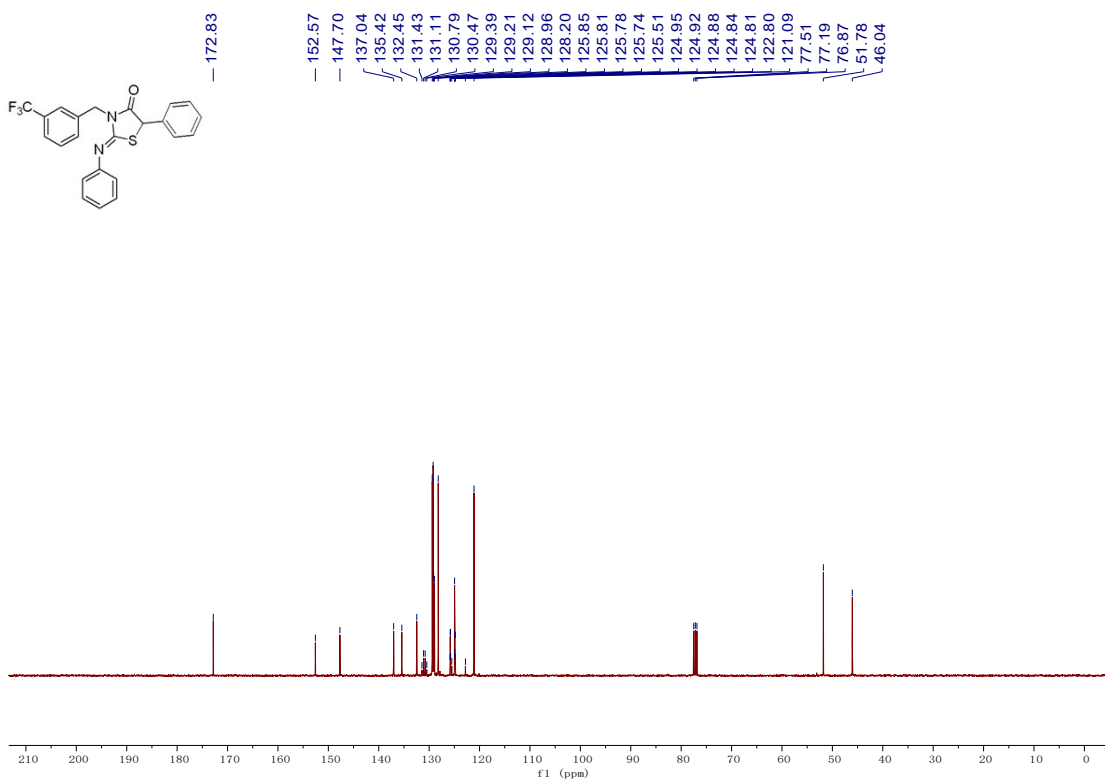

**<sup>13</sup>C{<sup>1</sup>H} NMR of 5j in CDCl<sub>3</sub> (100 MHz)**

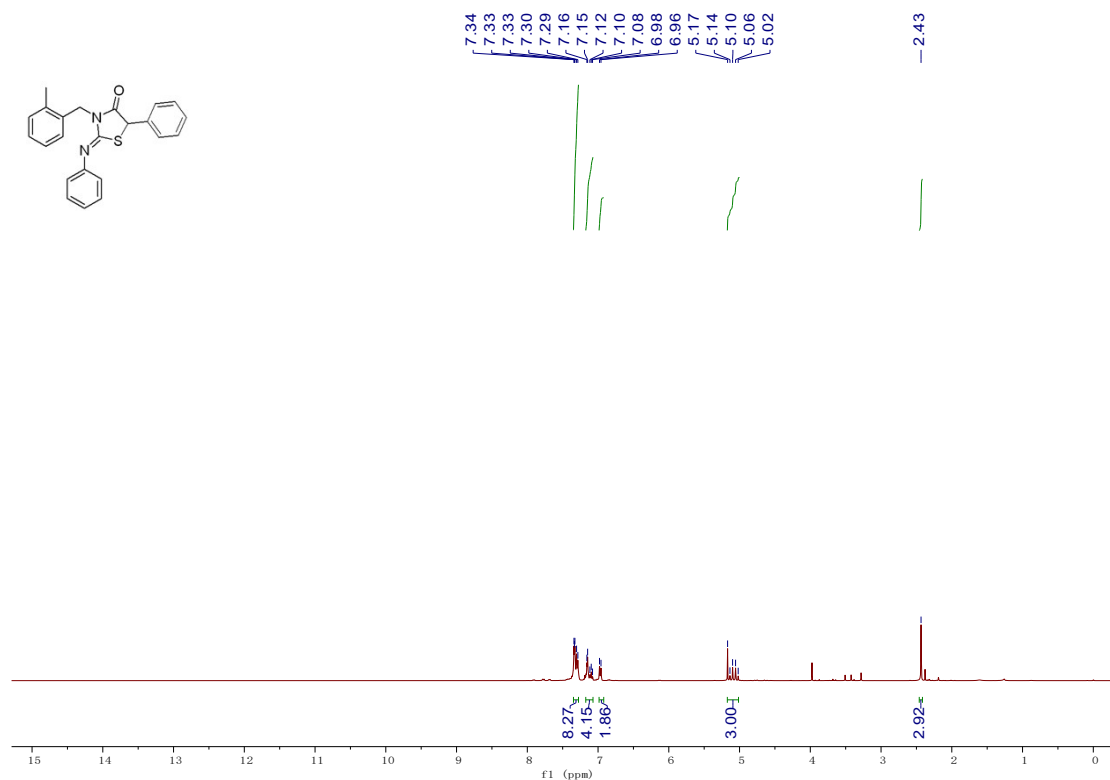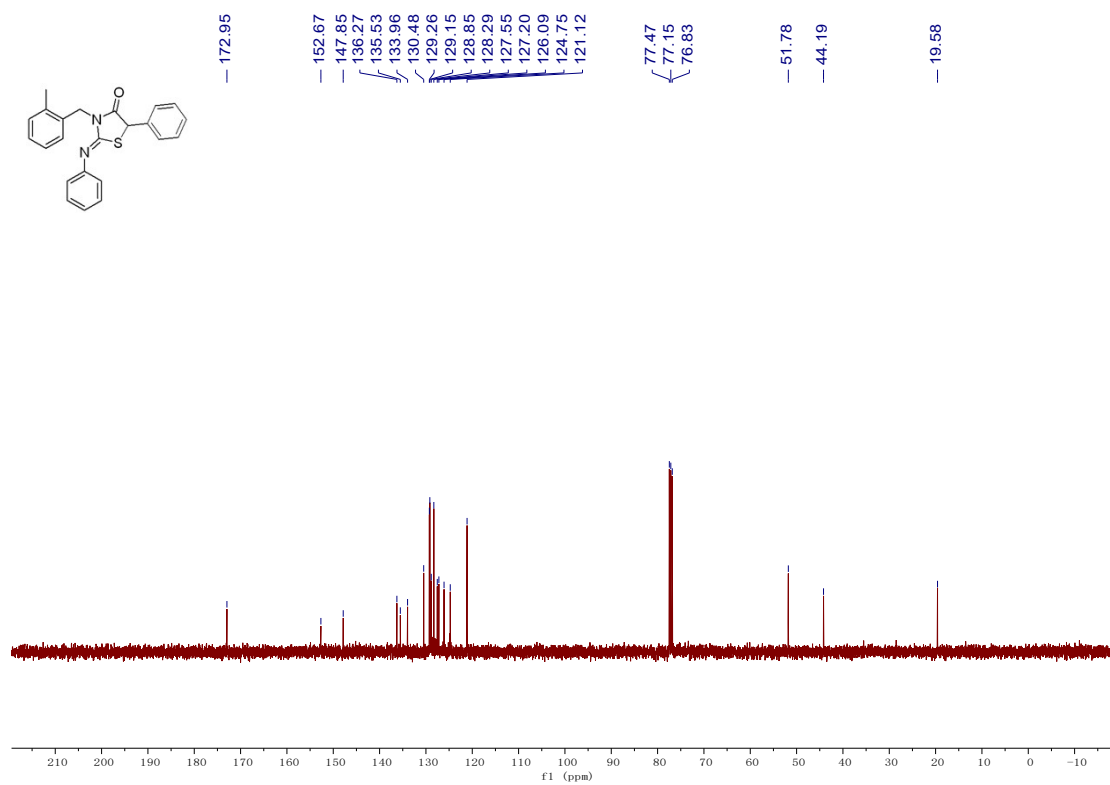

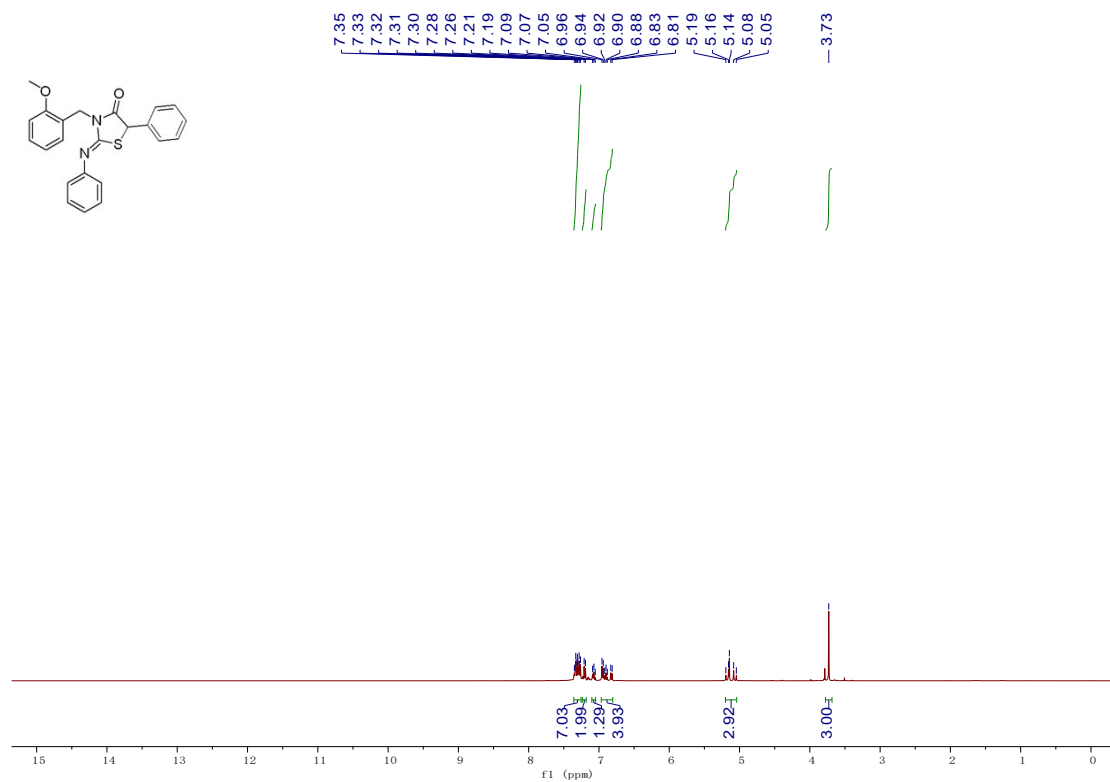

**<sup>1</sup>H NMR of 5l in CDCl<sub>3</sub> (400 MHz)**

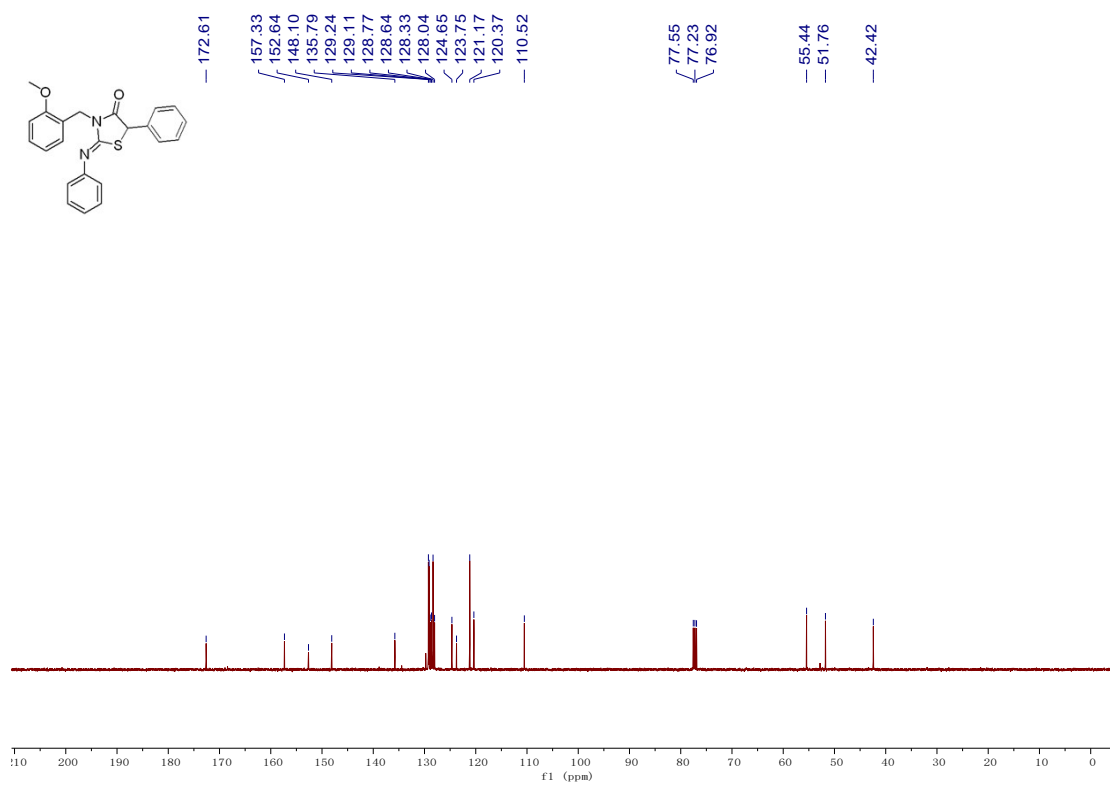

**<sup>13</sup>C{<sup>1</sup>H} NMR of 5l in CDCl<sub>3</sub> (100 MHz)**

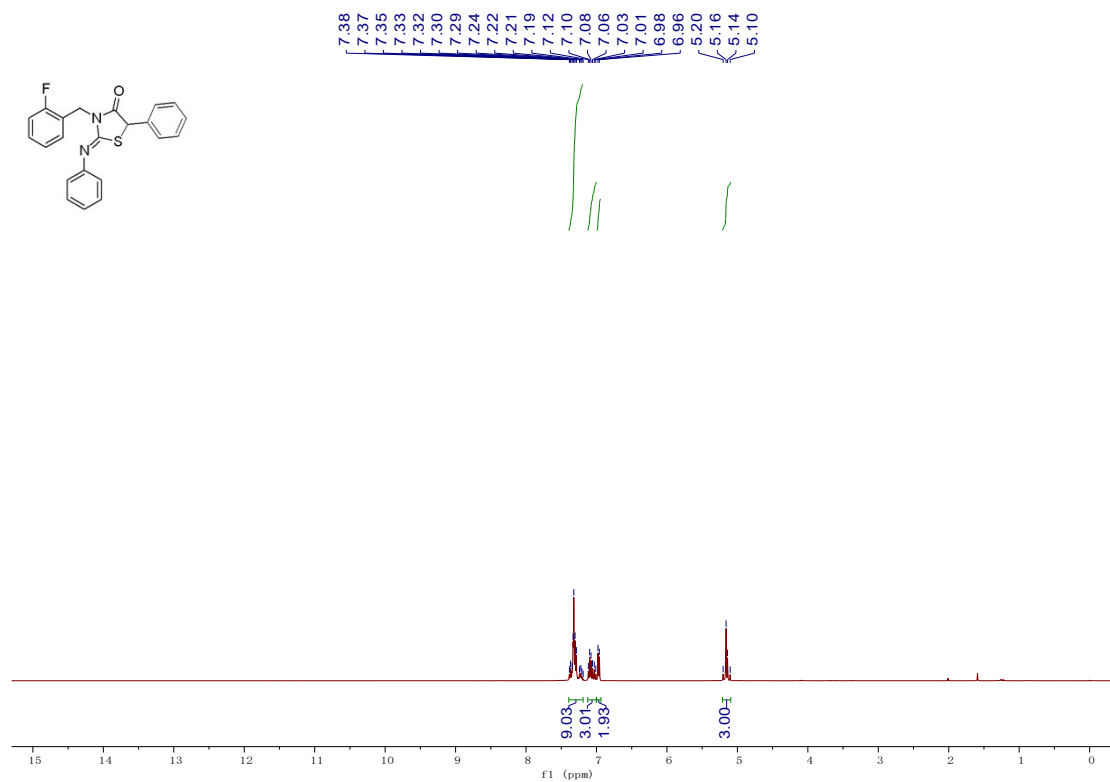

**<sup>1</sup>H NMR of 5m in CDCl<sub>3</sub> (400 MHz)**

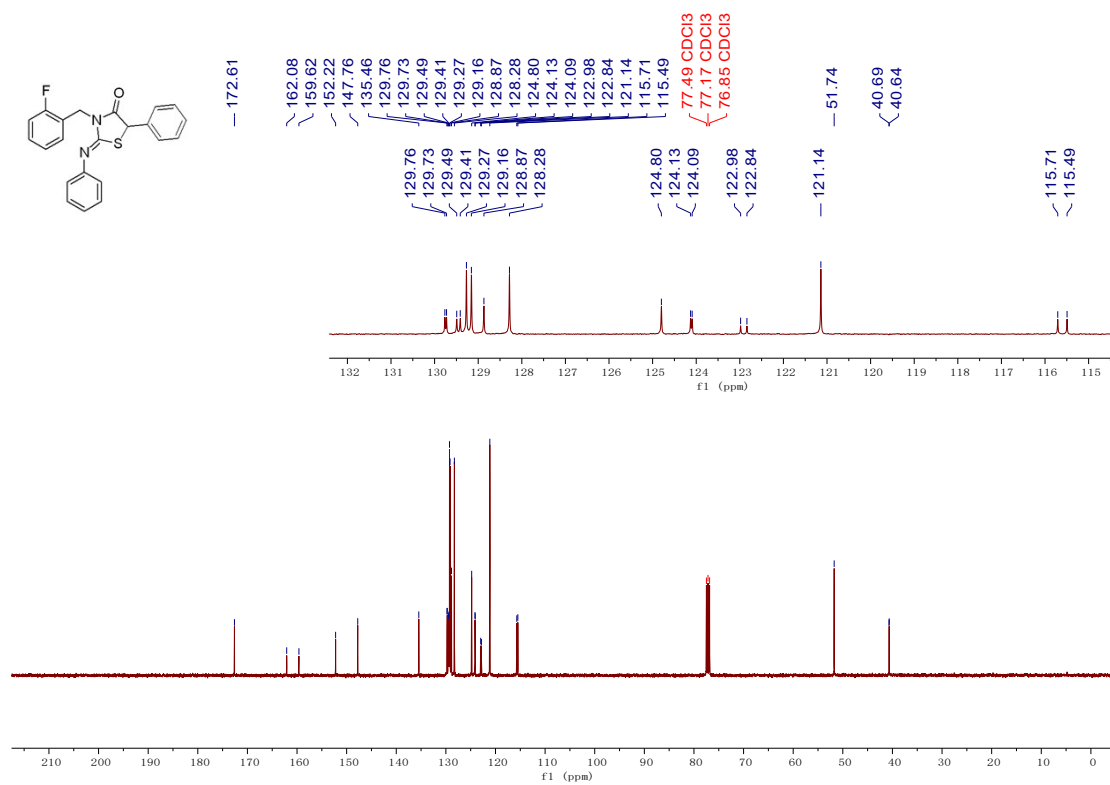

**<sup>13</sup>C{<sup>1</sup>H} NMR of 5m in CDCl<sub>3</sub> (100 MHz)**



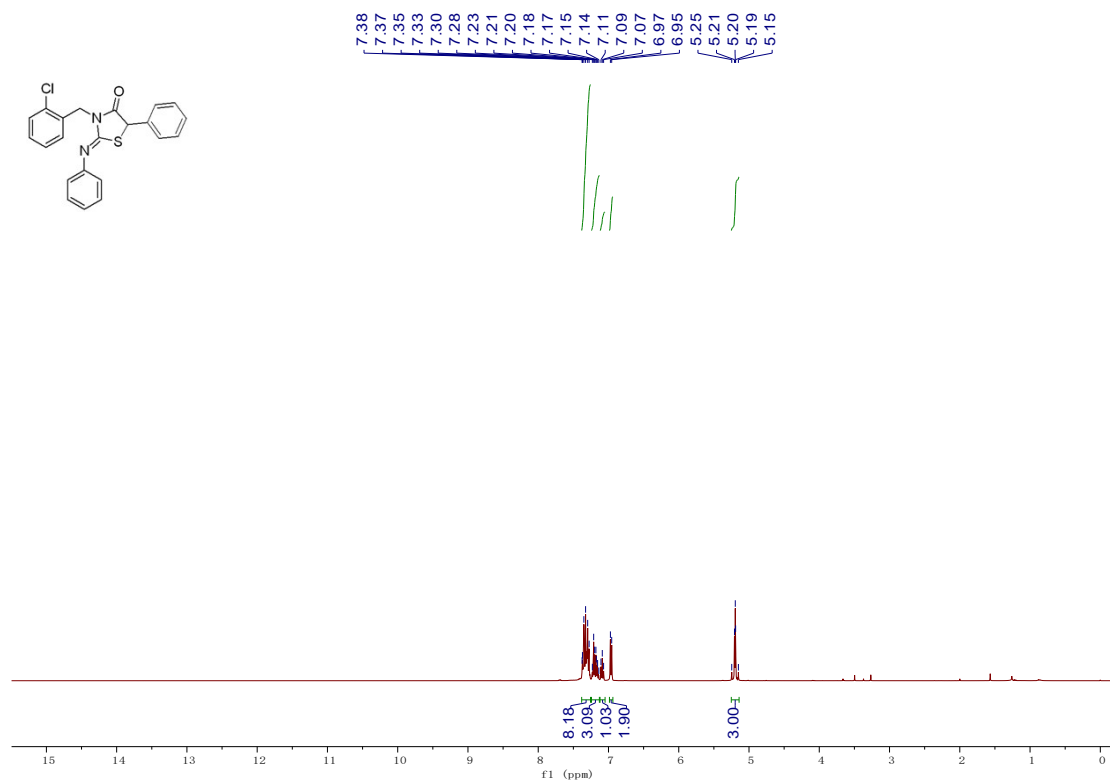

**<sup>1</sup>H NMR of 5n in CDCl<sub>3</sub> (400 MHz)**

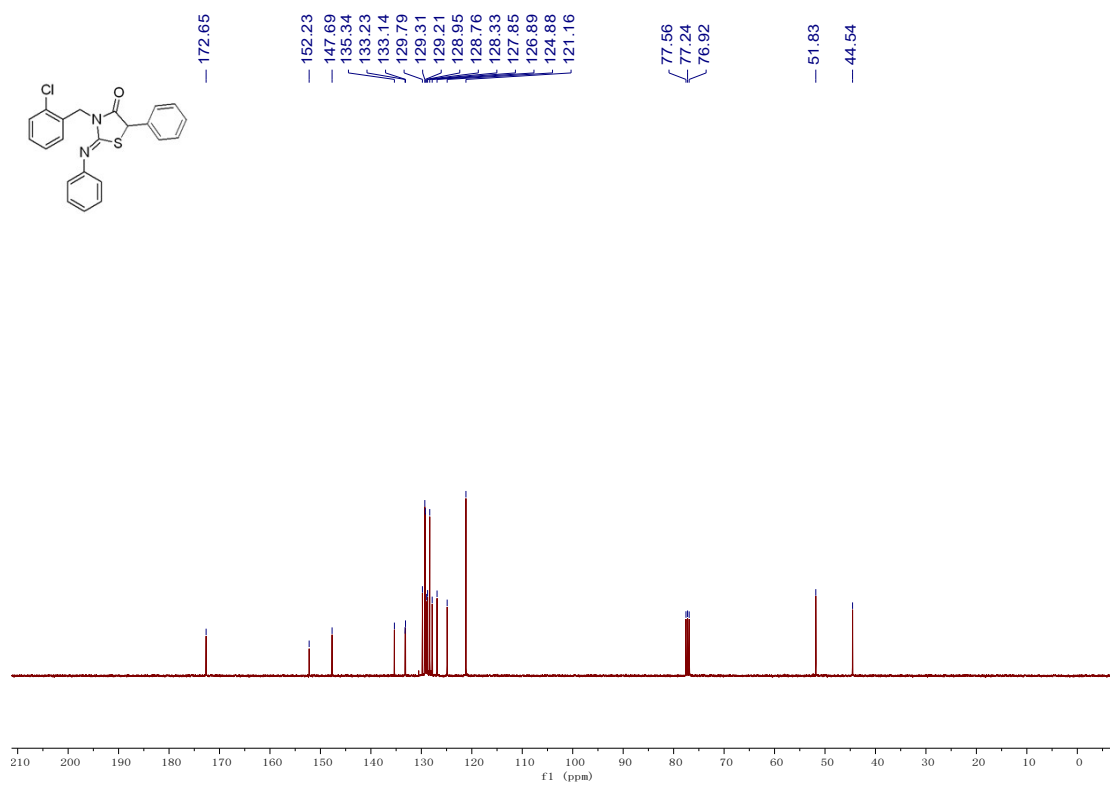

**<sup>13</sup>C{<sup>1</sup>H} NMR of 5n in CDCl<sub>3</sub> (100 MHz)**

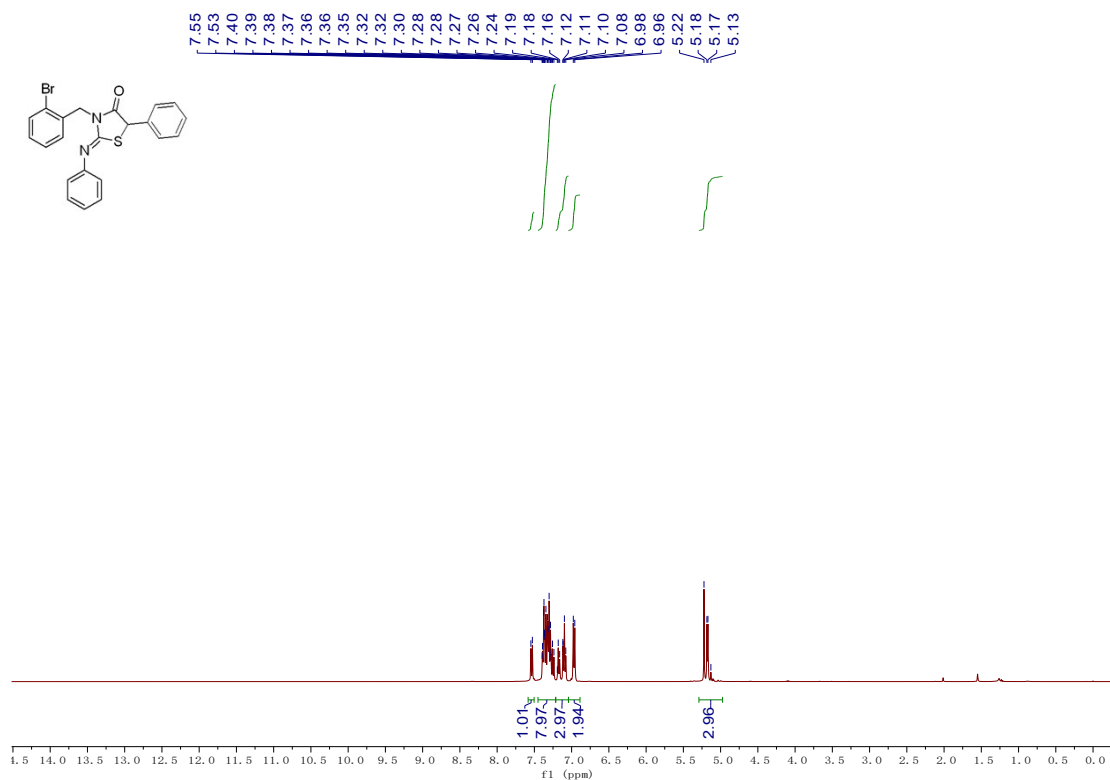

**<sup>1</sup>H NMR of 5o in CDCl<sub>3</sub> (400 MHz)**

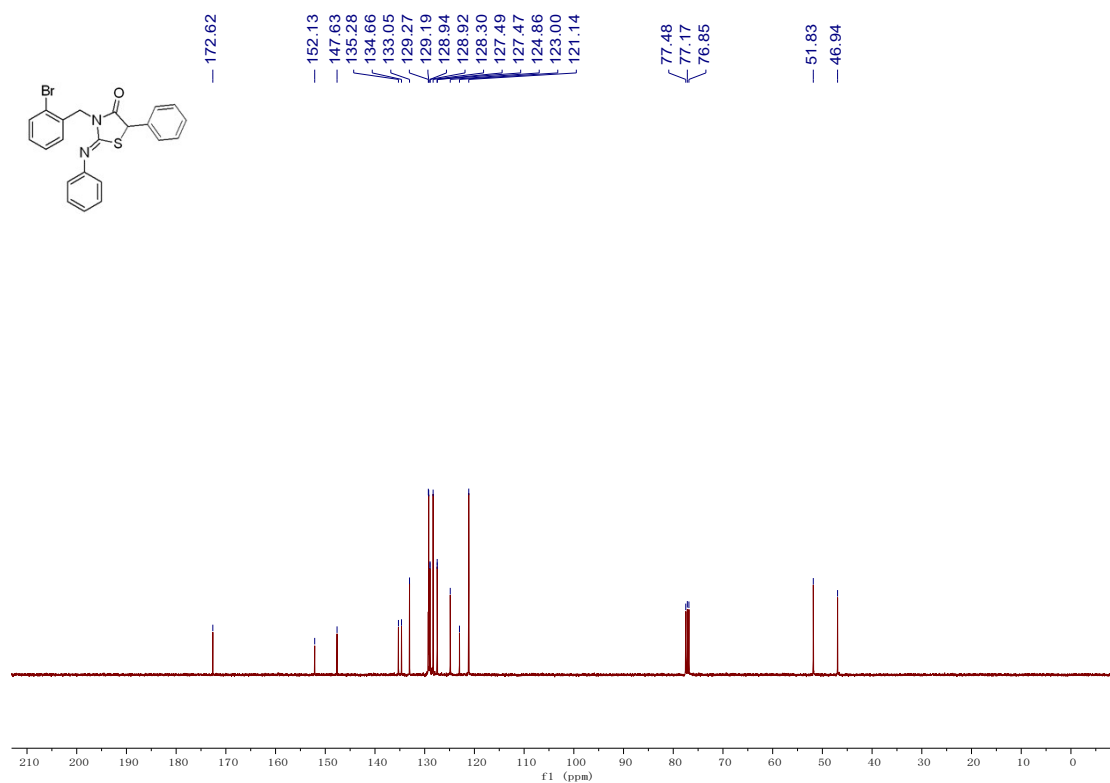

**<sup>13</sup>C{<sup>1</sup>H} NMR of 5o in CDCl<sub>3</sub> (100 MHz)**

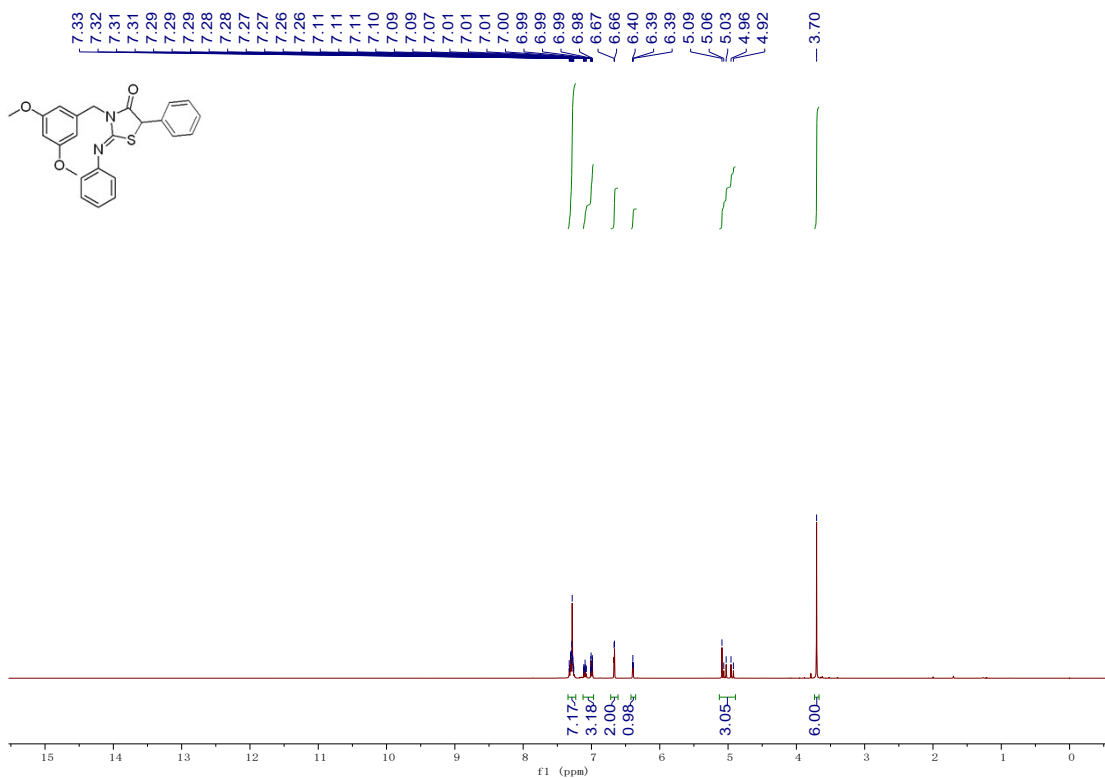

**<sup>1</sup>H NMR of 5p in CDCl<sub>3</sub> (400 MHz)**

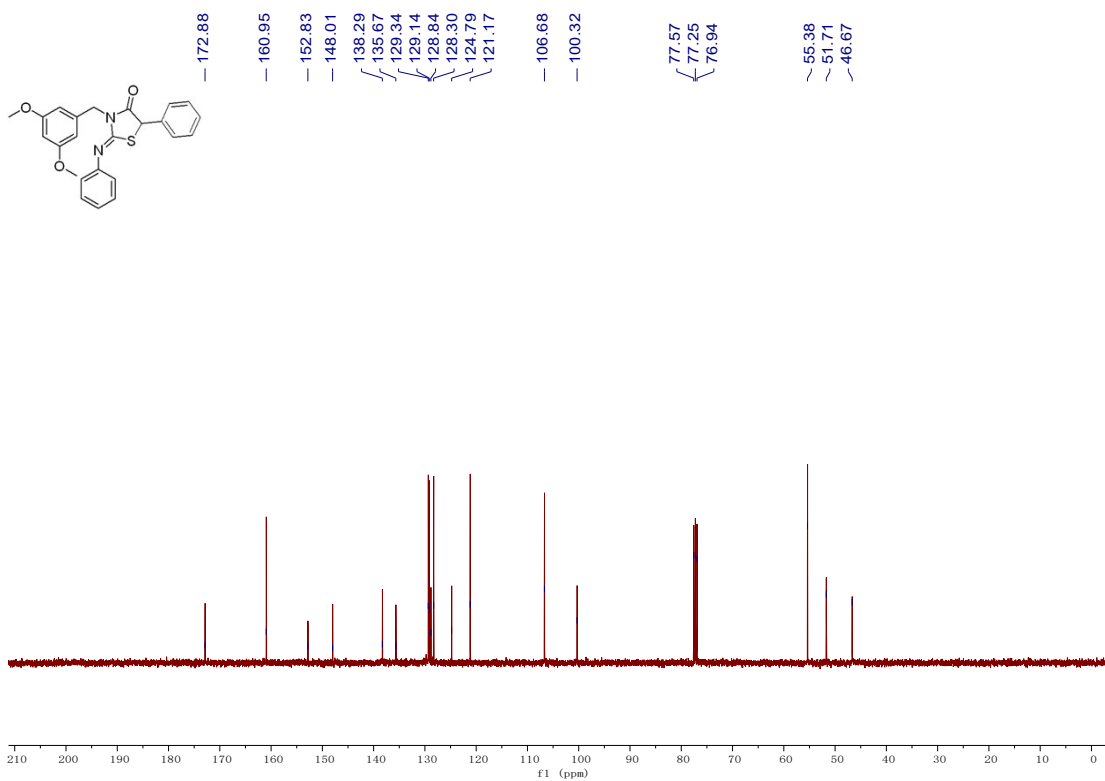

**<sup>13</sup>C{<sup>1</sup>H} NMR of 5p in CDCl<sub>3</sub> (100 MHz)**

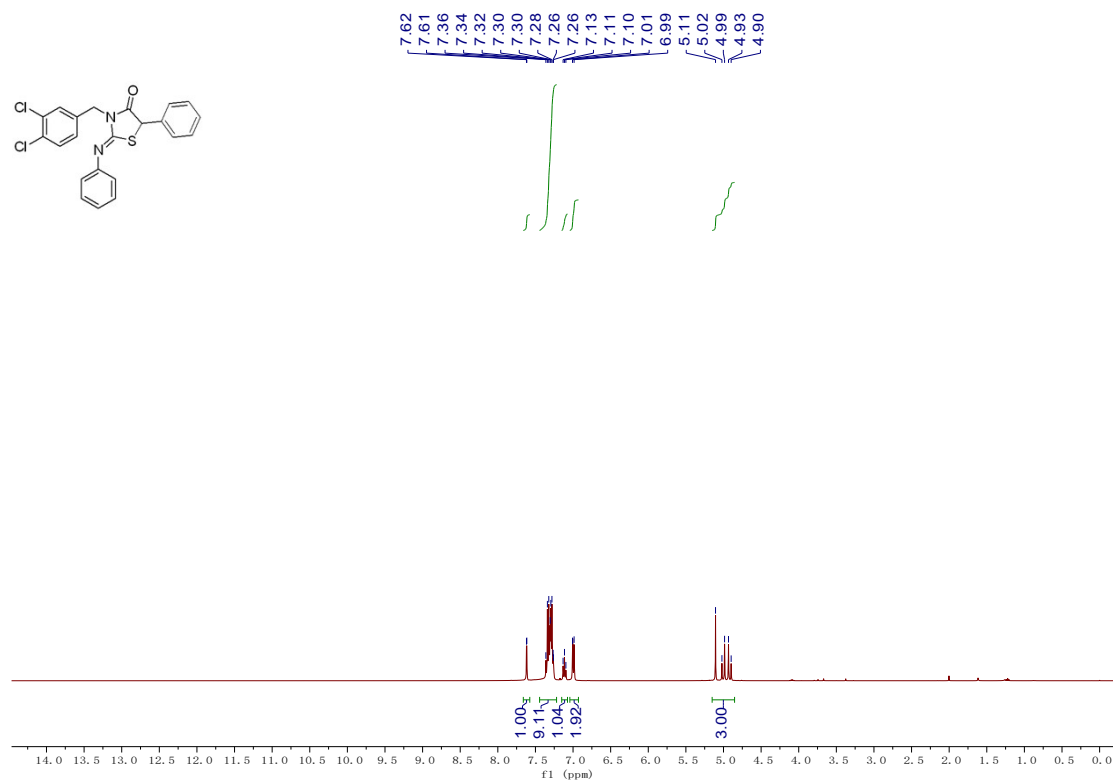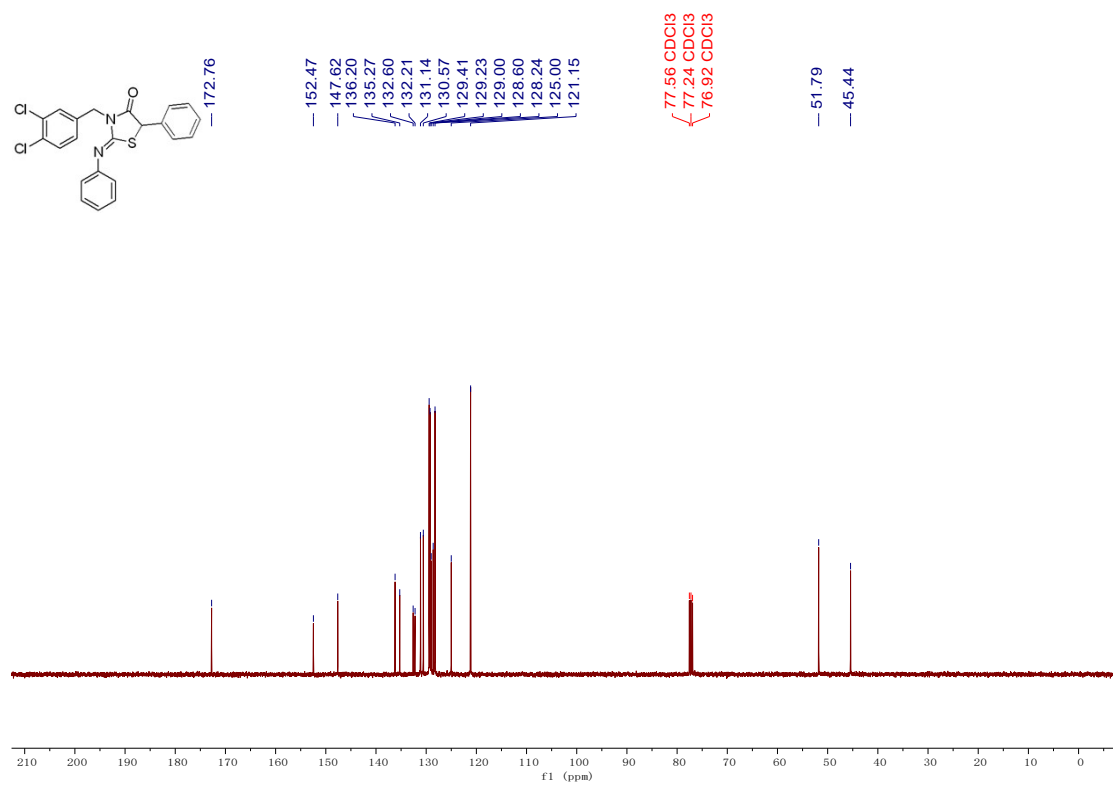

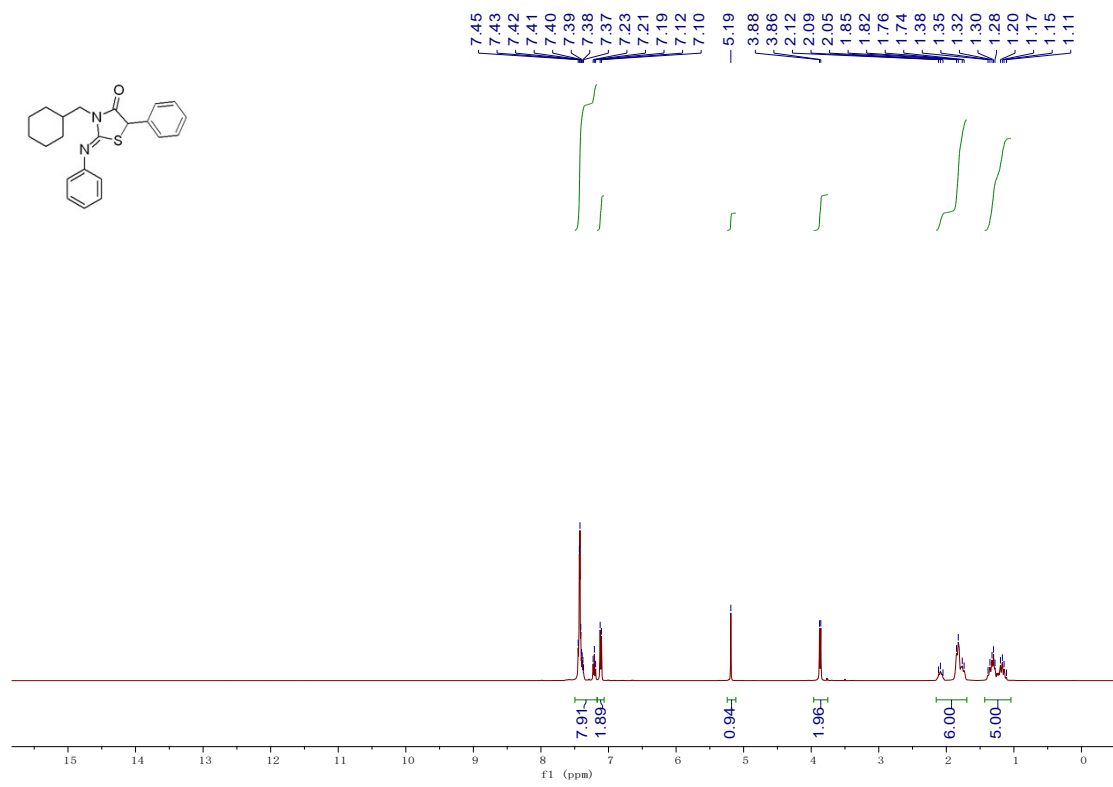

**<sup>1</sup>H NMR of 5r in CDCl<sub>3</sub> (400 MHz)**

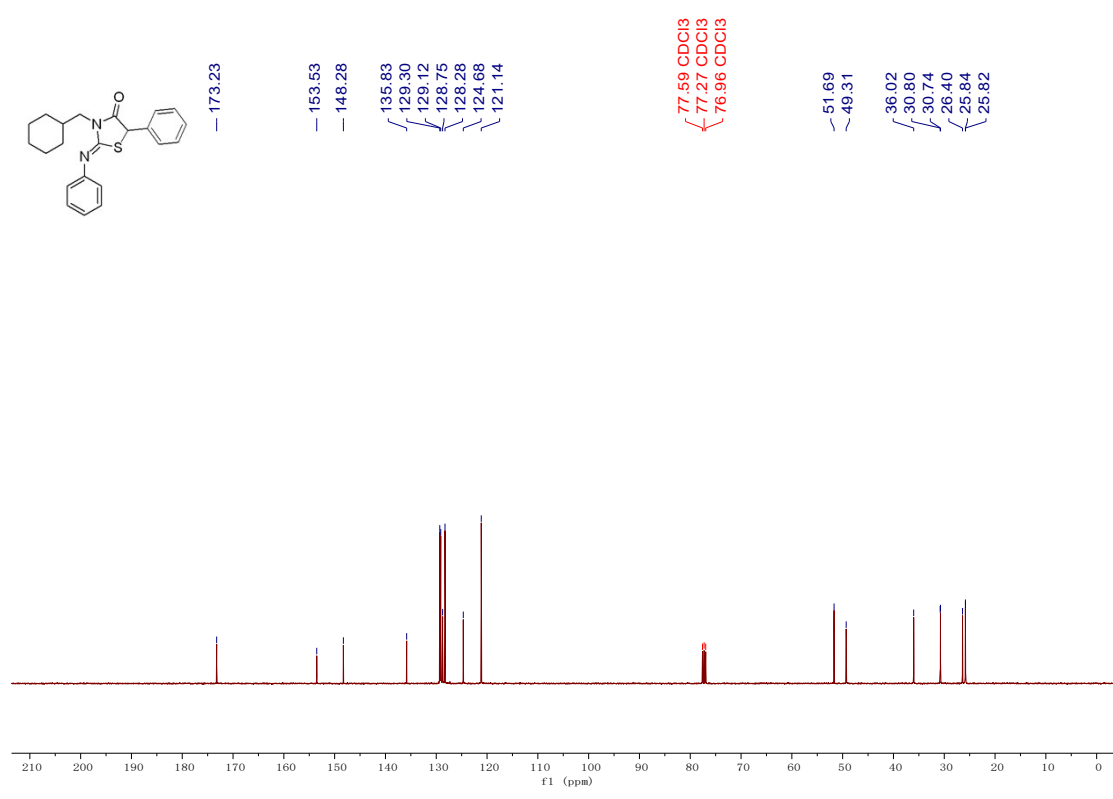

**<sup>13</sup>C{<sup>1</sup>H} NMR of 5r in CDCl<sub>3</sub> (100 MHz)**

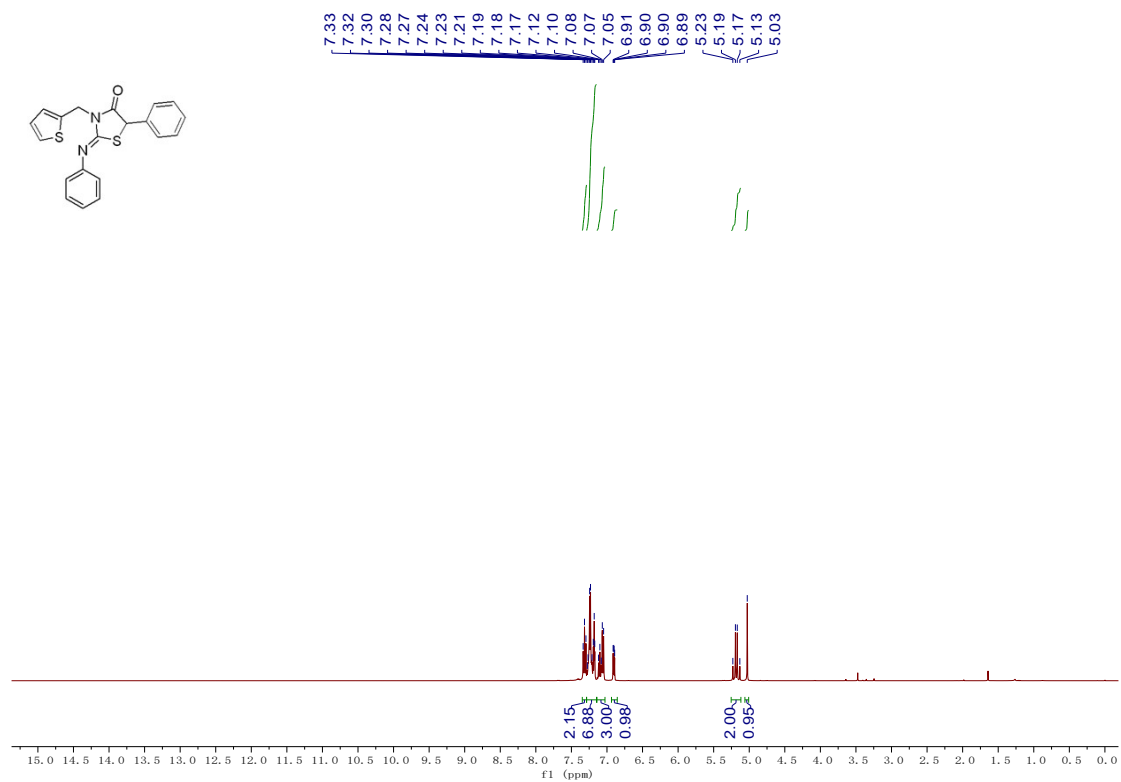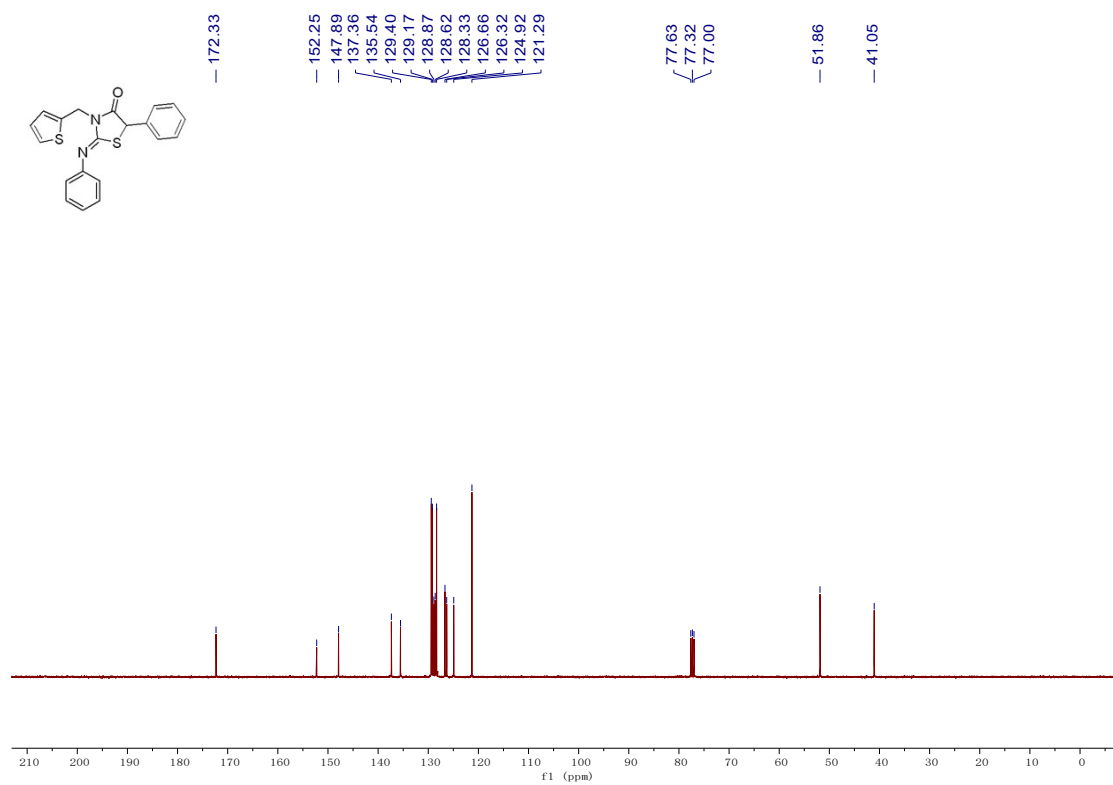

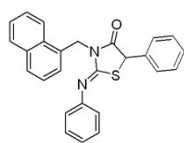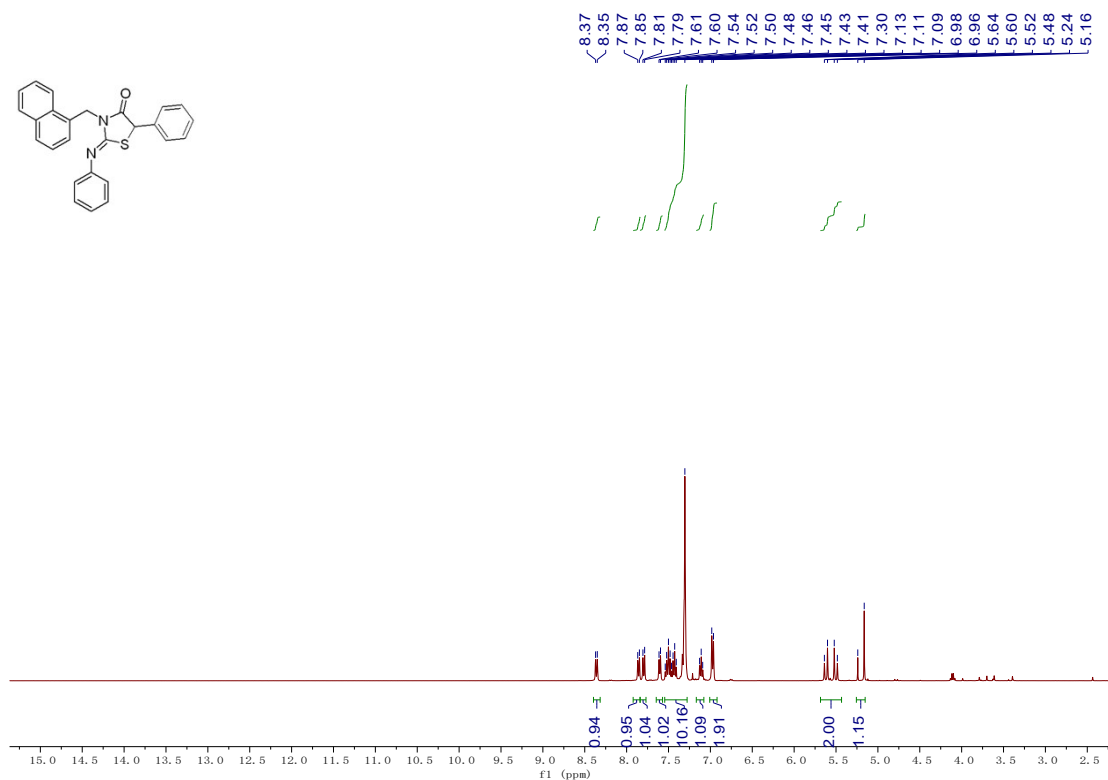

**<sup>1</sup>H NMR of 5t in CDCl<sub>3</sub> (400 MHz)**

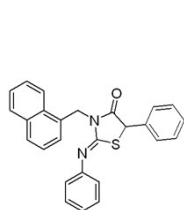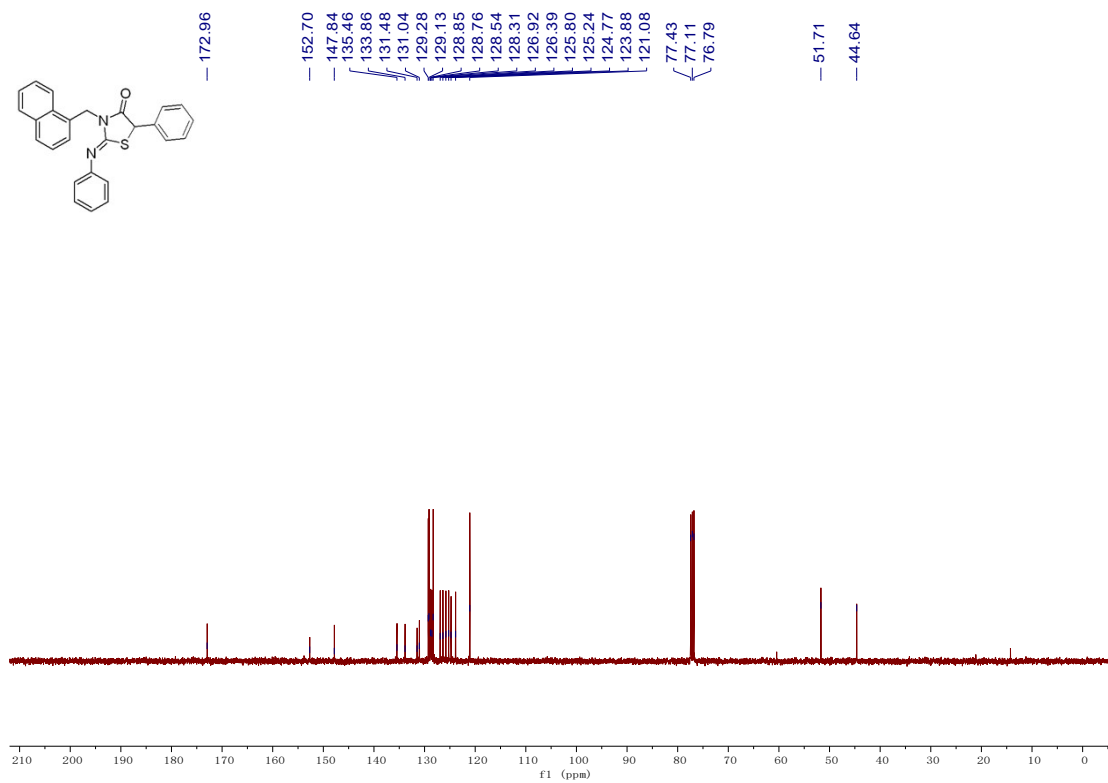

**<sup>13</sup>C{<sup>1</sup>H} NMR of 5t in CDCl<sub>3</sub> (100 MHz)**

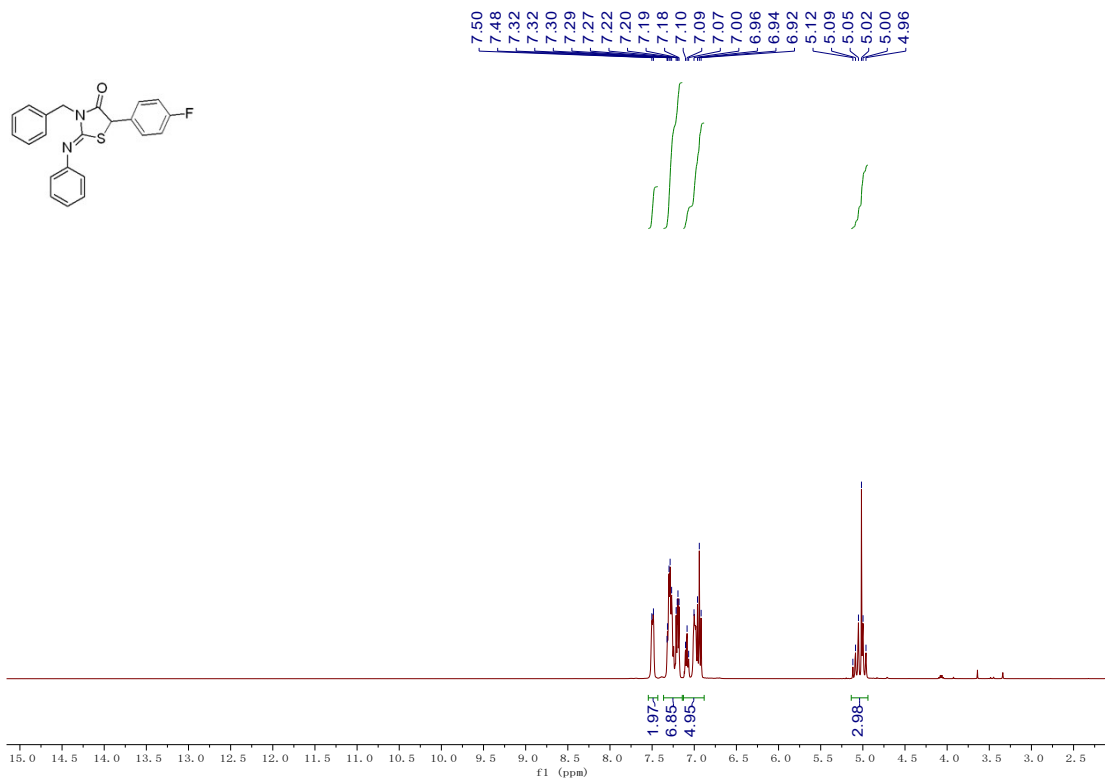

**<sup>1</sup>H NMR of 6a in CDCl<sub>3</sub> (400 MHz)**

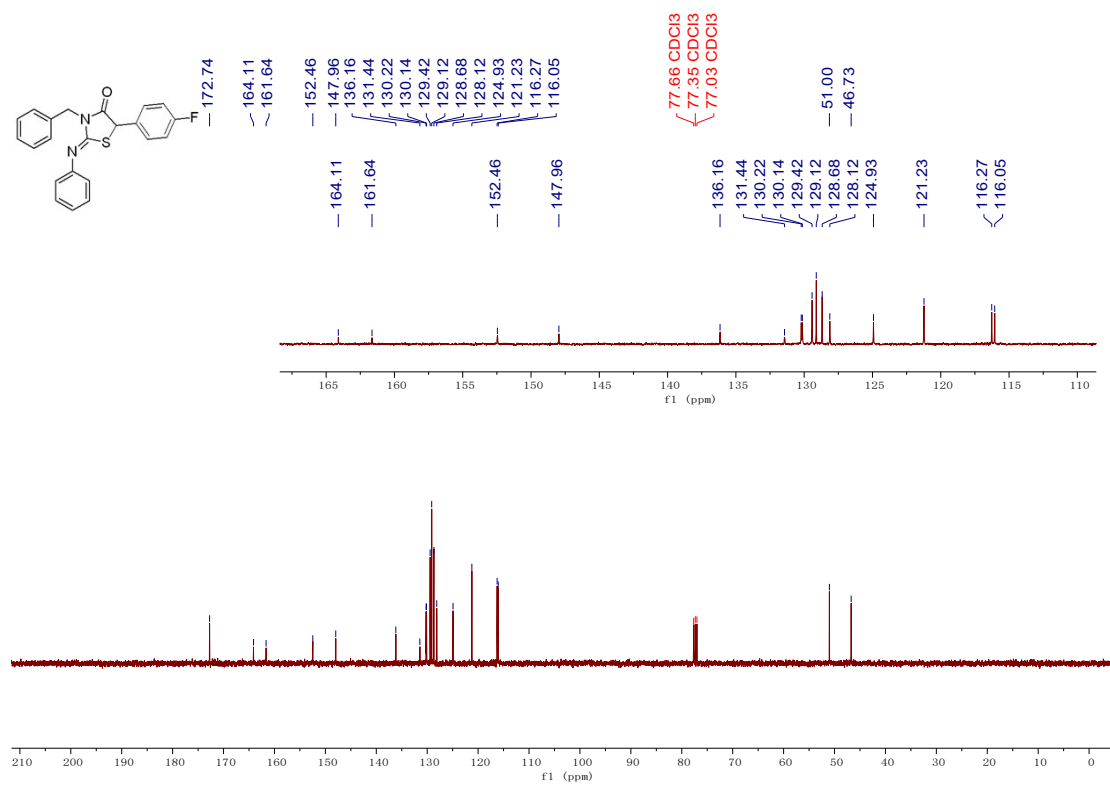

**<sup>13</sup>C{<sup>1</sup>H} NMR of 6a in CDCl<sub>3</sub> (100 MHz)**



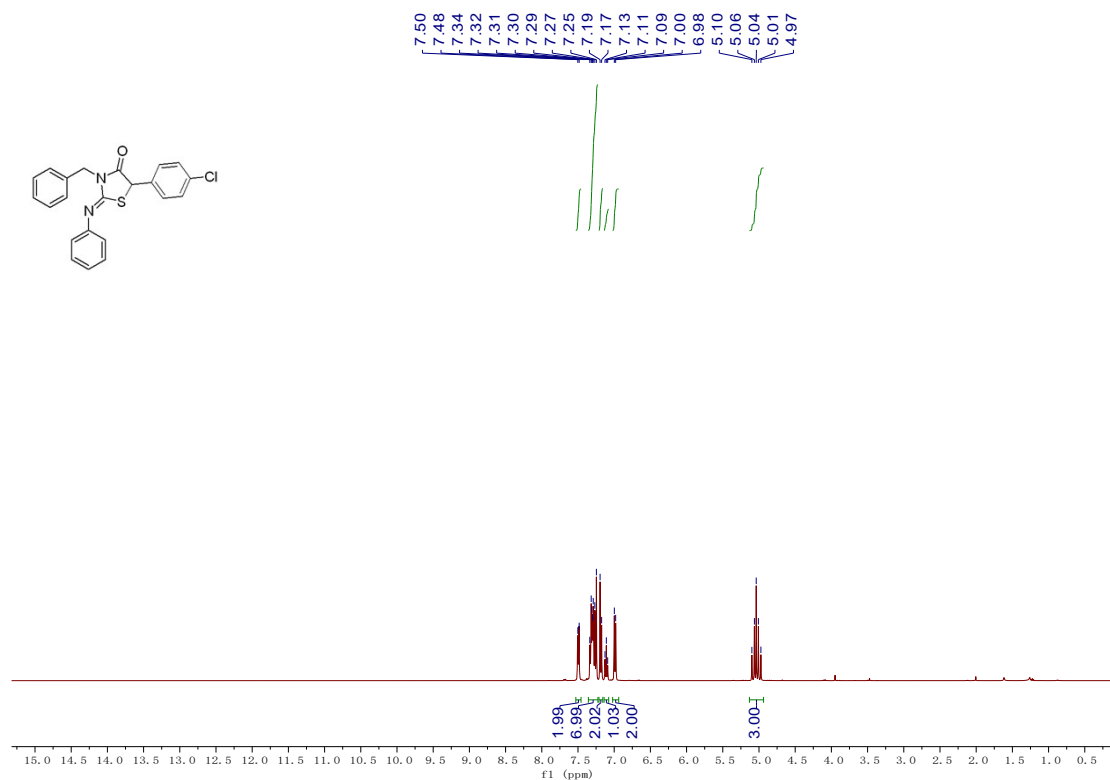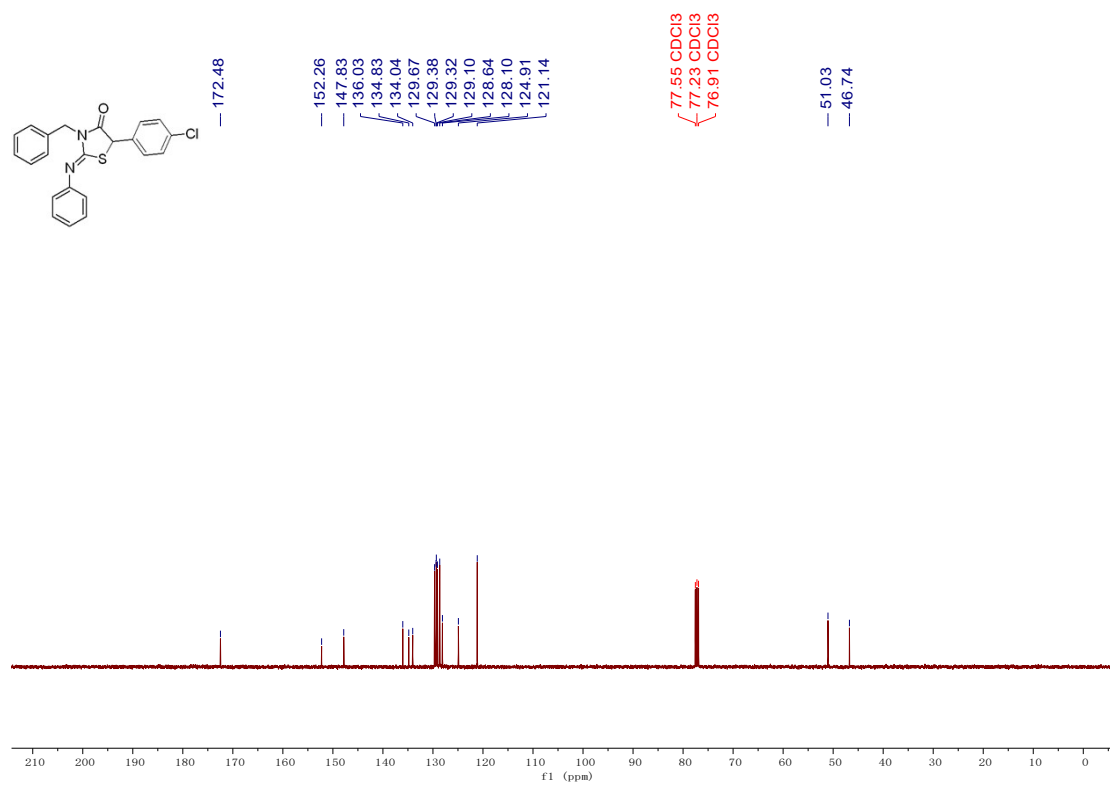

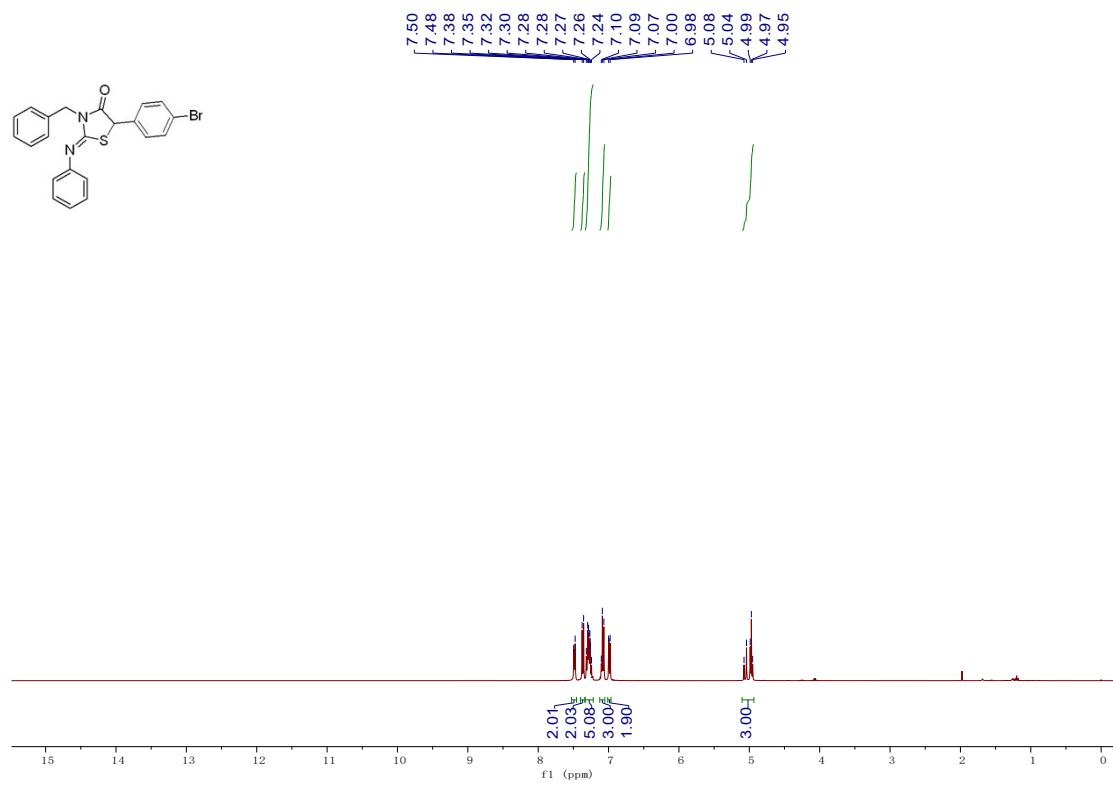

**<sup>1</sup>H NMR of 6c in CDCl<sub>3</sub> (400 MHz)**

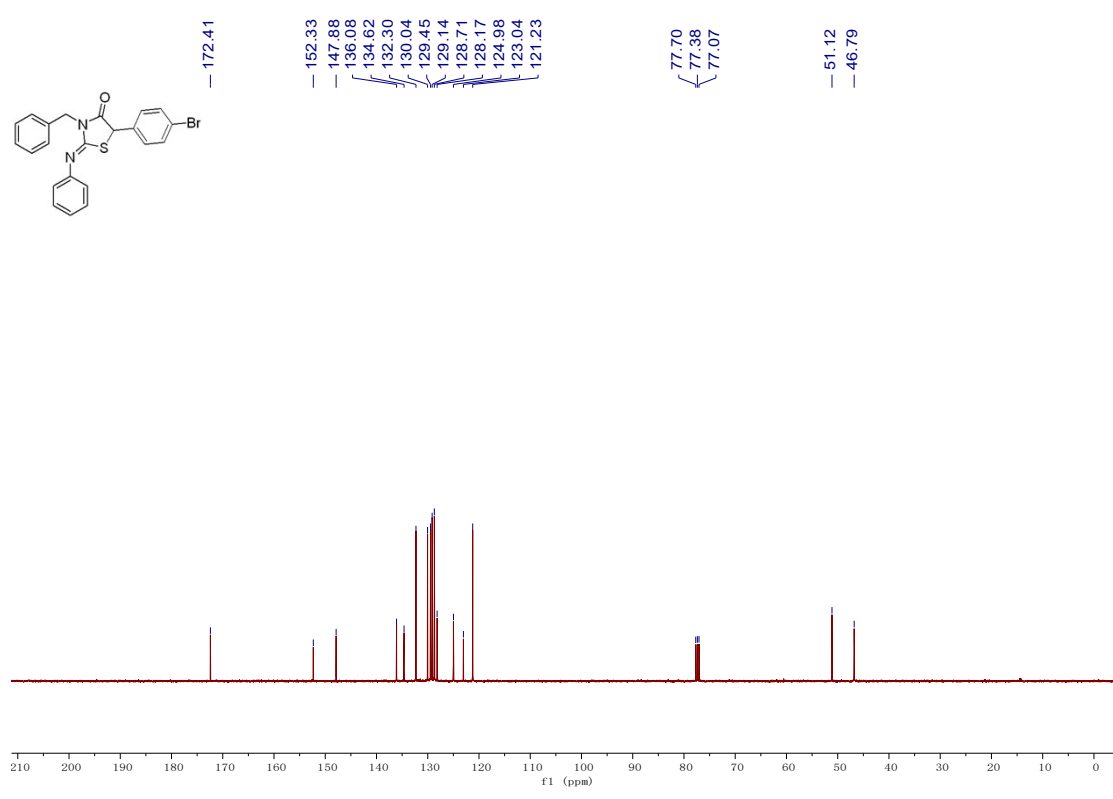

**<sup>13</sup>C{<sup>1</sup>H} NMR of 6c in CDCl<sub>3</sub> (100 MHz)**

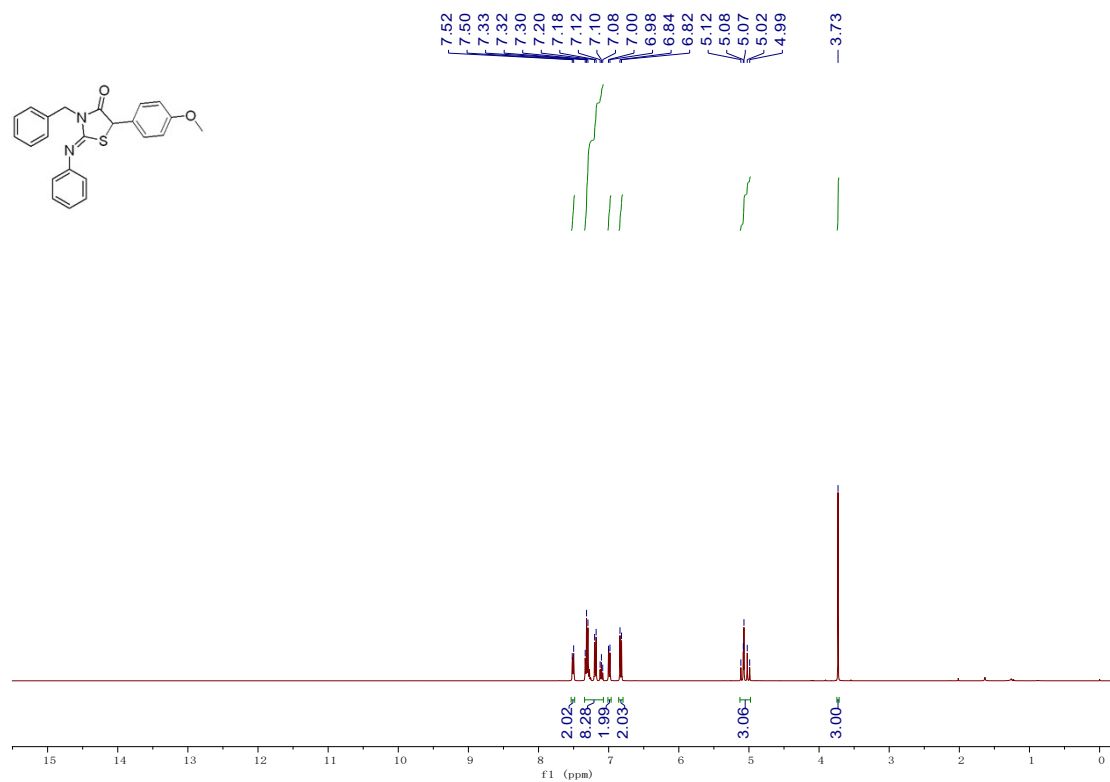

<sup>1</sup>H NMR of 6d in CDCl<sub>3</sub> (400 MHz)

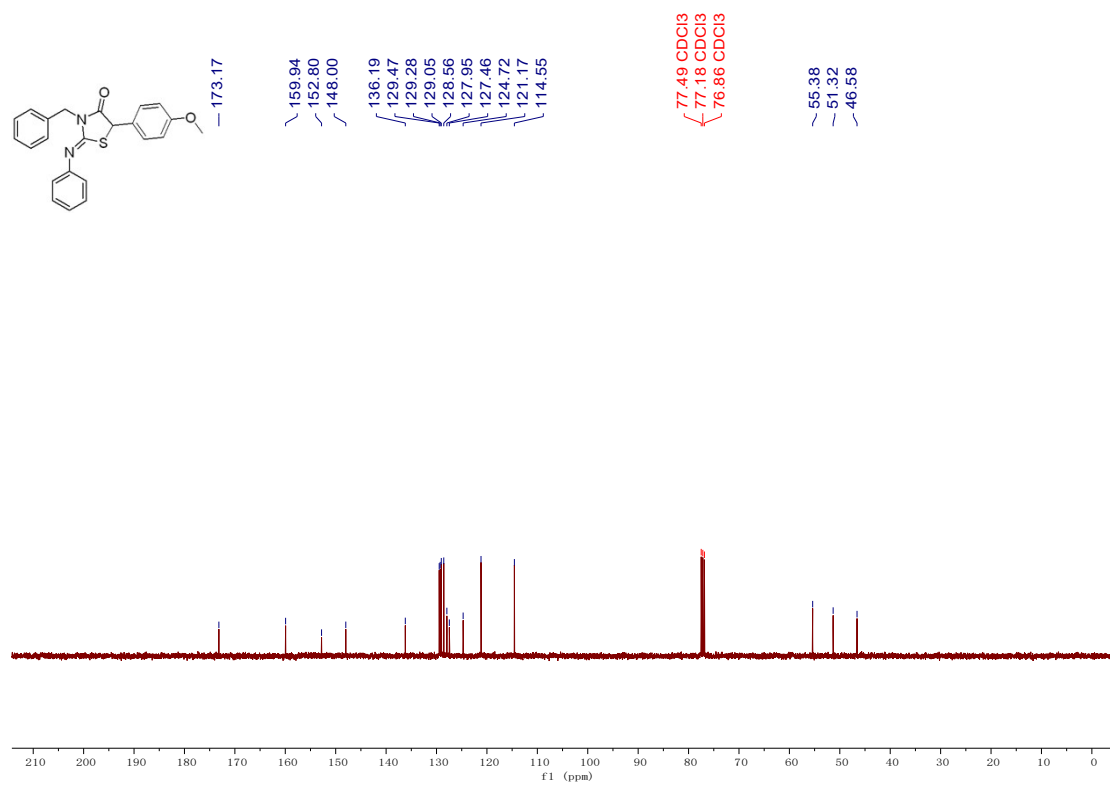

<sup>13</sup>C{<sup>1</sup>H} NMR of 6d in CDCl<sub>3</sub> (100 MHz)

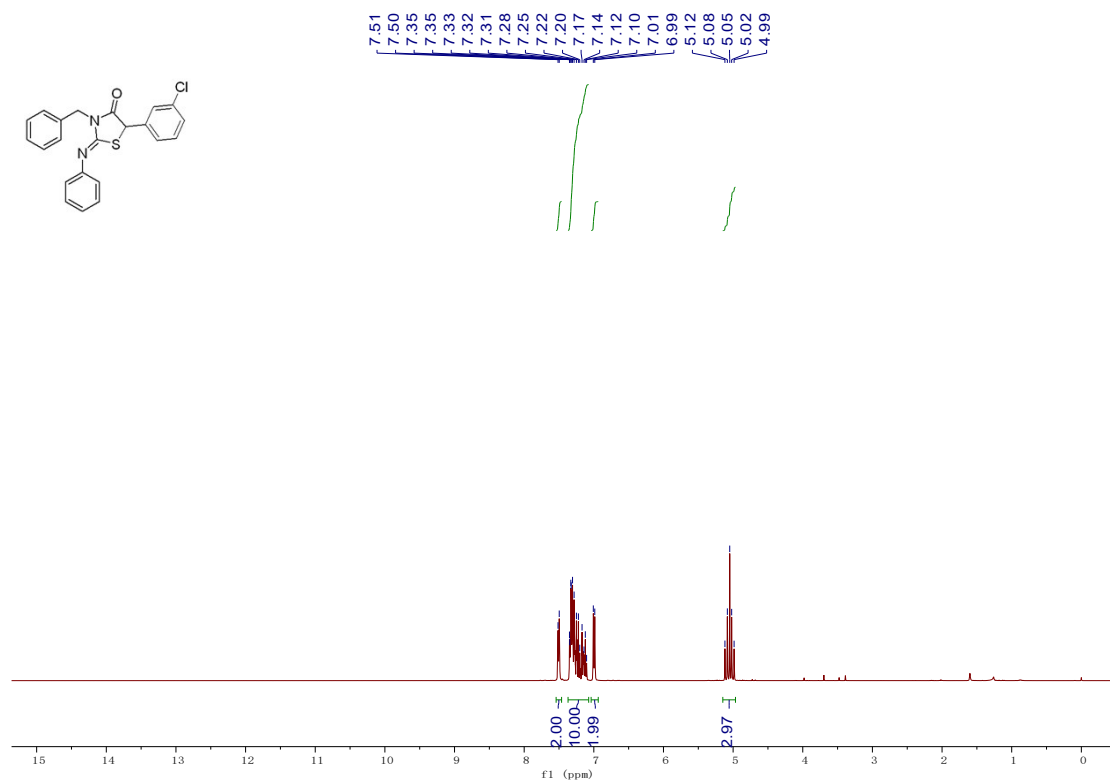

$^1\text{H NMR}$  of 6e in  $\text{CDCl}_3$  (400 MHz)

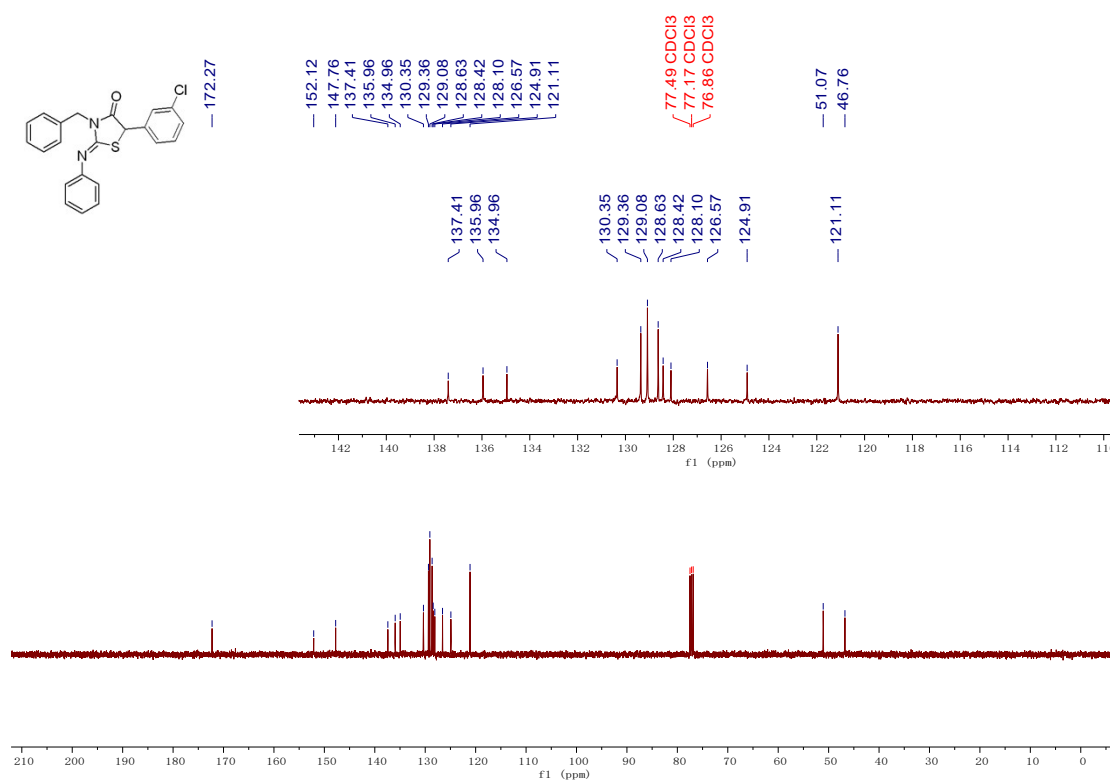

$^{13}\text{C}\{^1\text{H}\}$  NMR of 6e in  $\text{CDCl}_3$  (100 MHz)

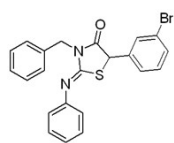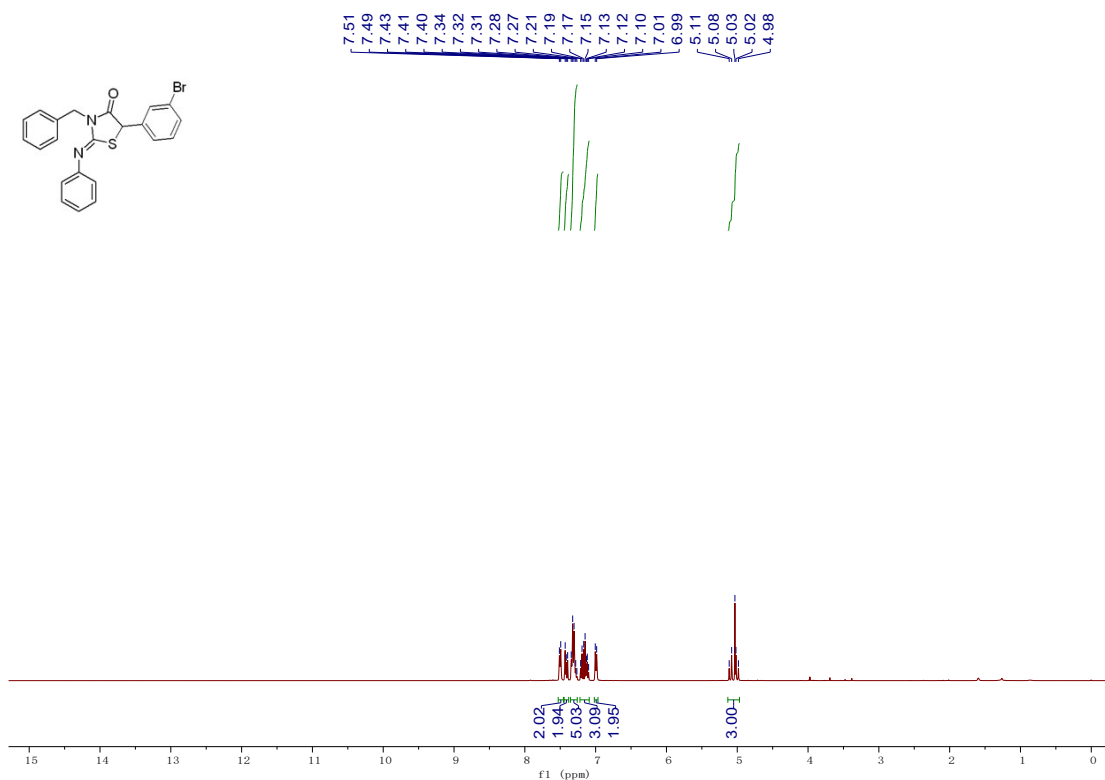

**$^1\text{H}$  NMR of 6f in  $\text{CDCl}_3$  (400 MHz)**

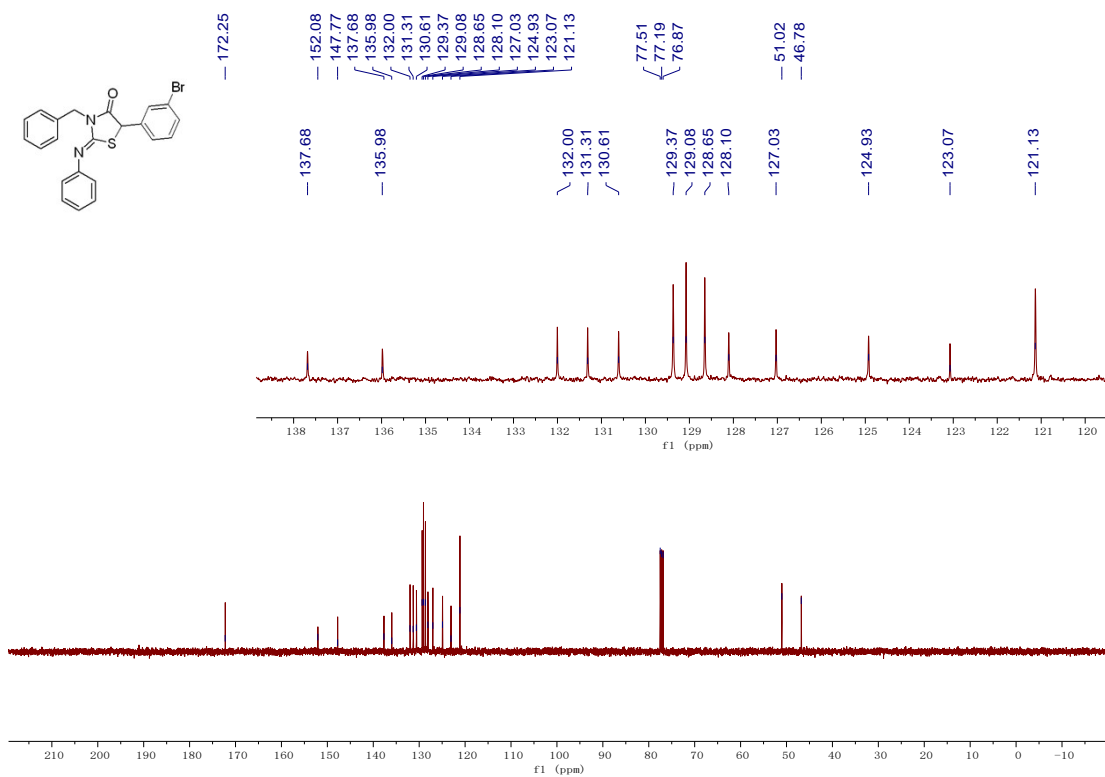

**$^{13}\text{C}\{^1\text{H}\}$  NMR of 6f in  $\text{CDCl}_3$  (100 MHz)**

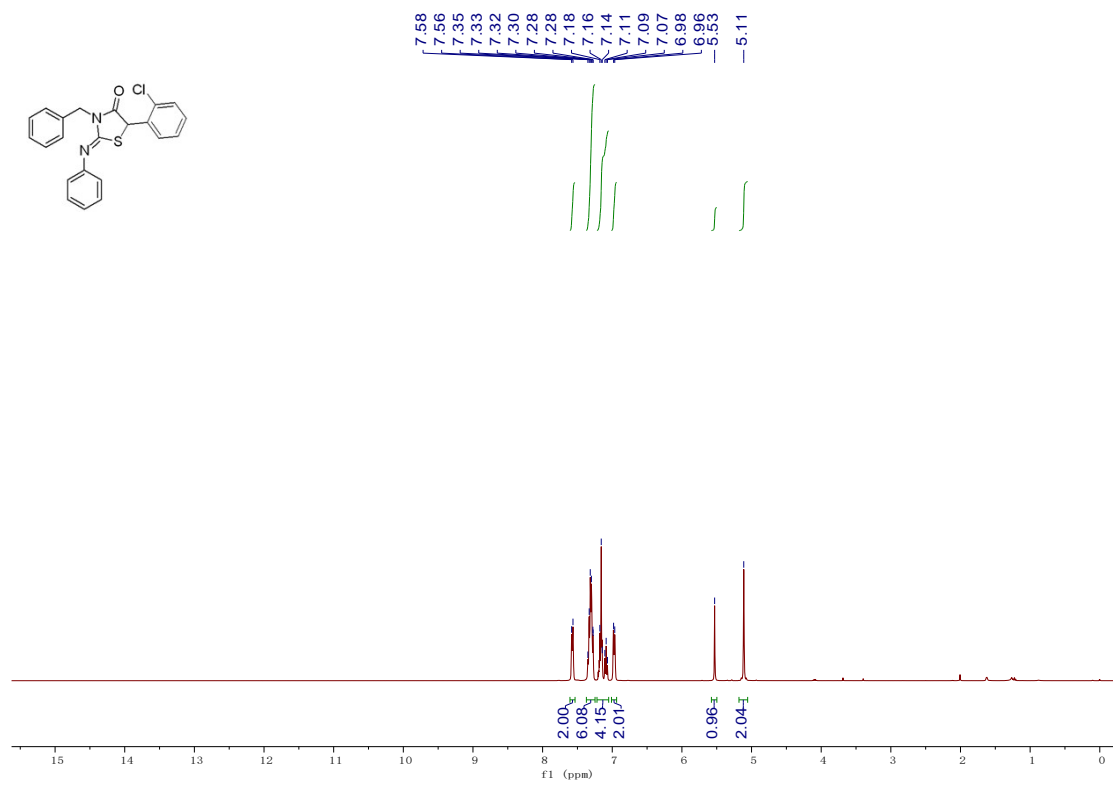

<sup>1</sup>H NMR of 6g in CDCl<sub>3</sub> (400 MHz)

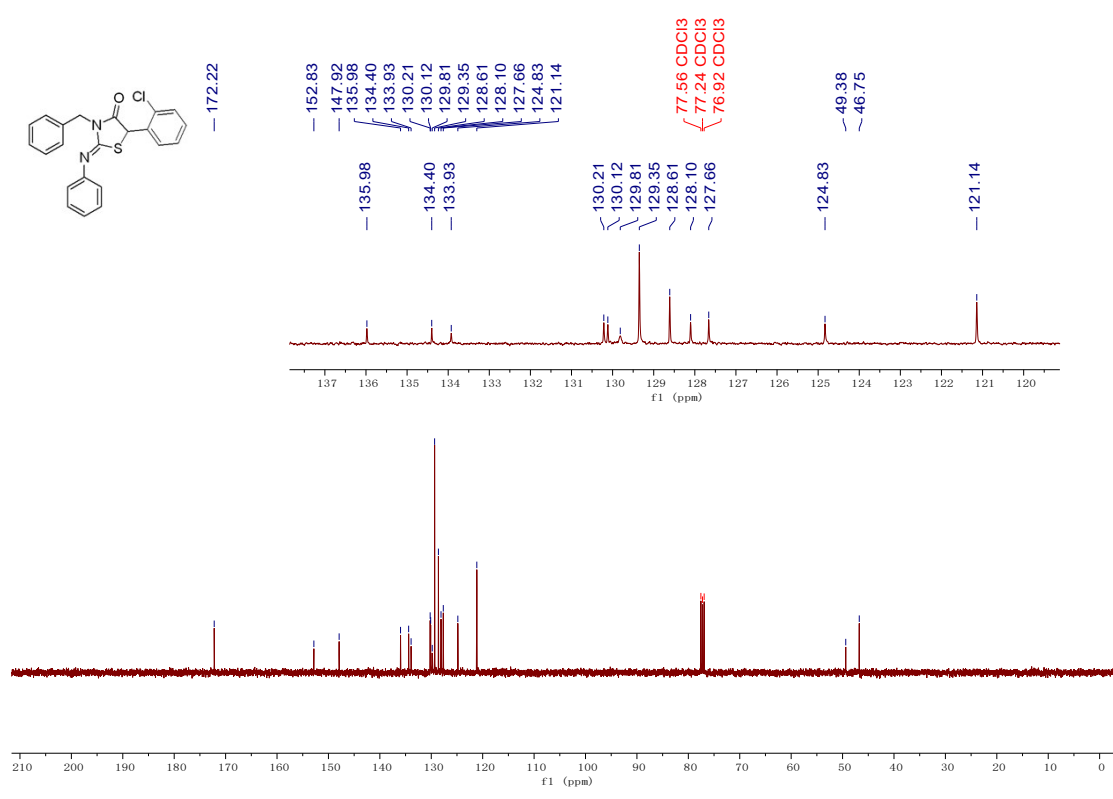

<sup>13</sup>C{<sup>1</sup>H} NMR of 6g in CDCl<sub>3</sub> (100 MHz)

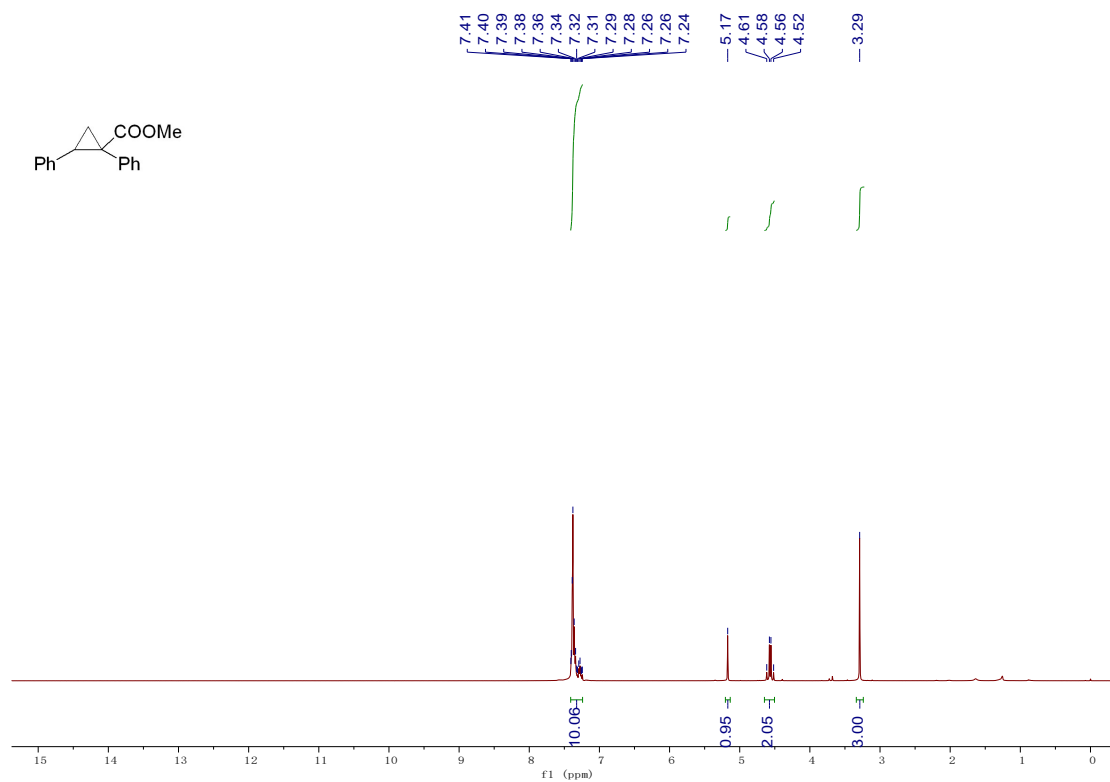

<sup>1</sup>H NMR of 8 in CDCl<sub>3</sub> (400 MHz)

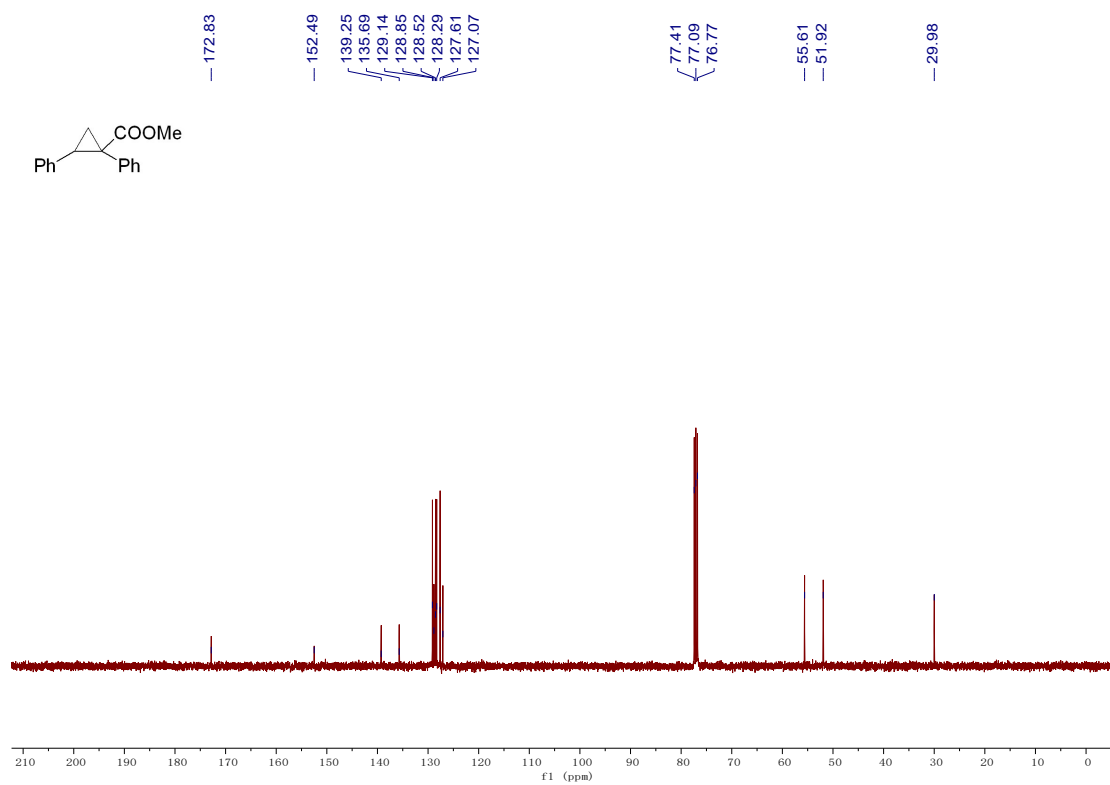

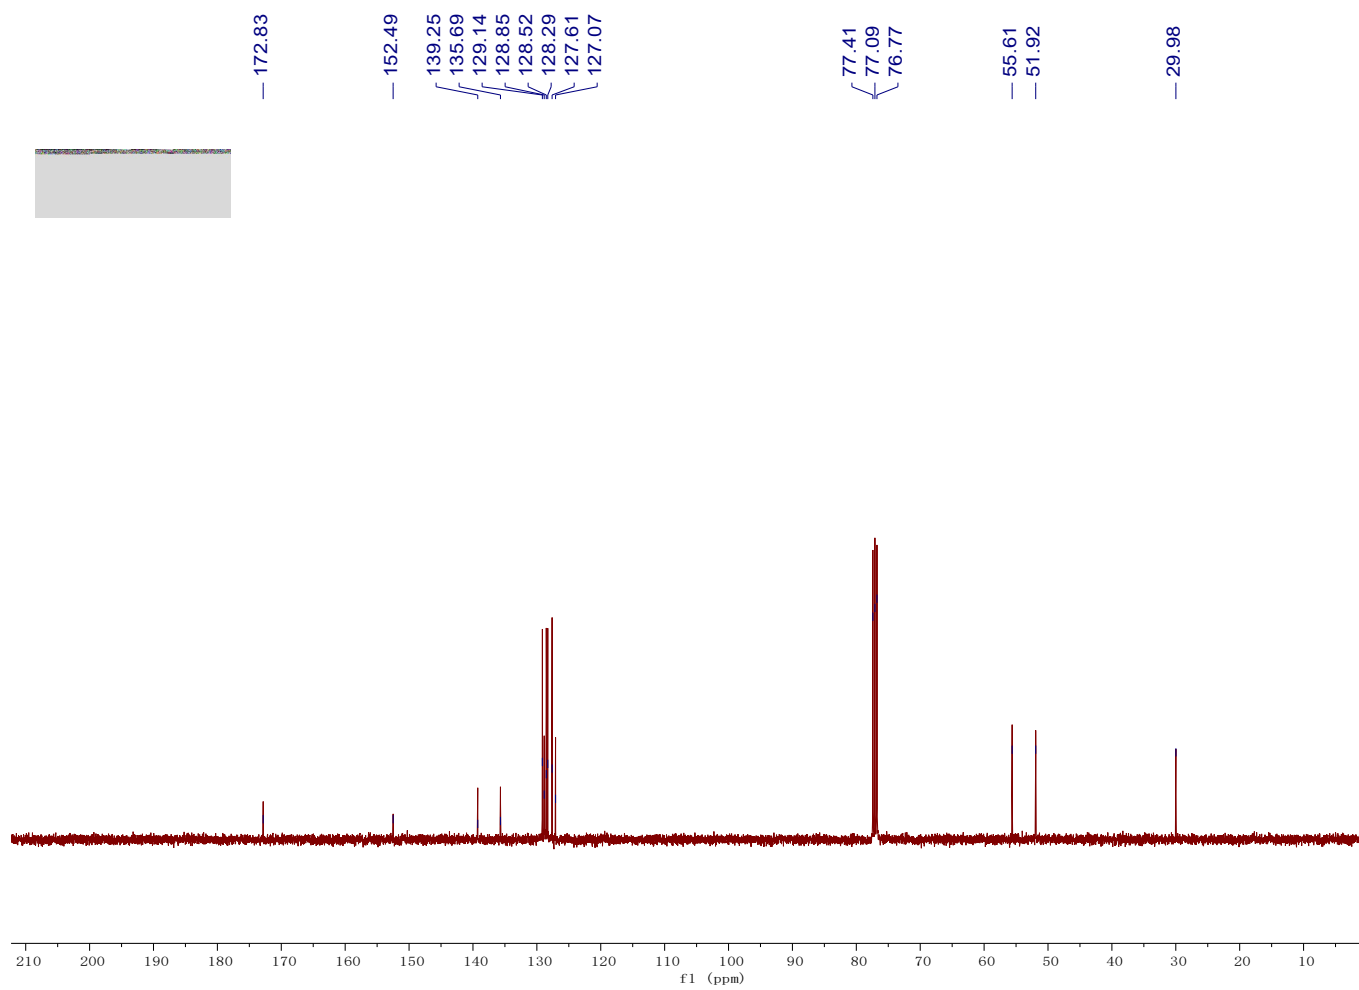

$^{13}\text{C}\{^1\text{H}\}$  NMR of 8 in  $\text{CDCl}_3$  (100 MHz)



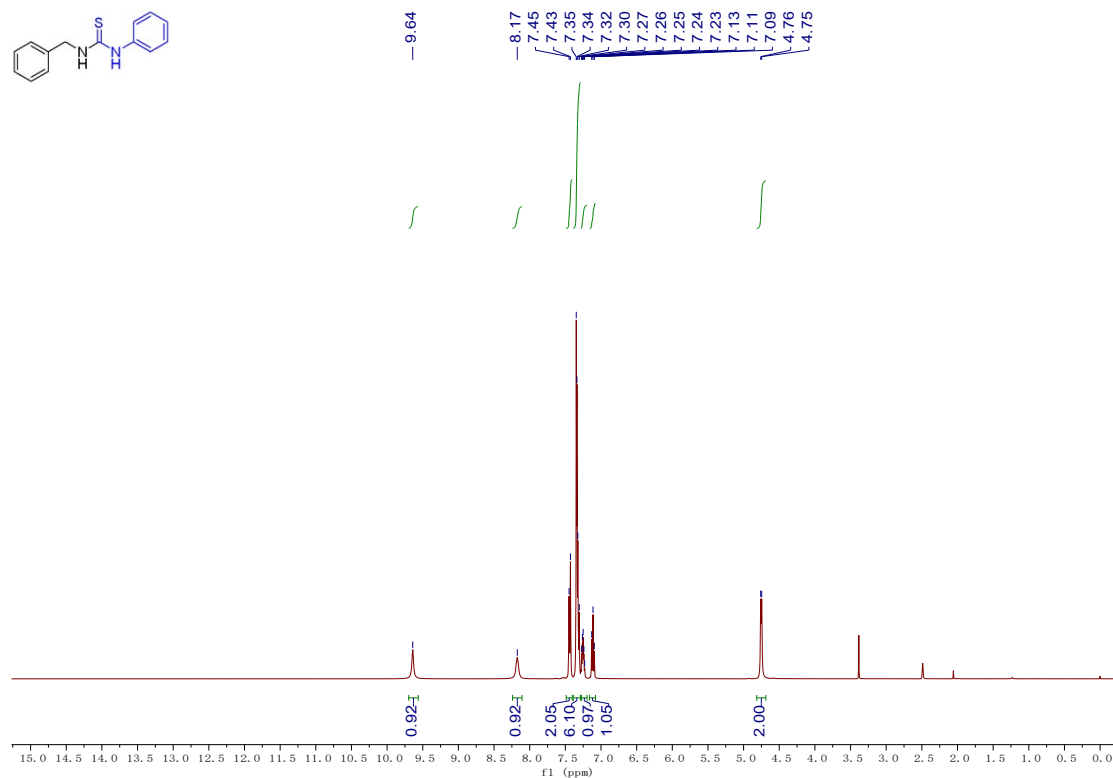

$^1\text{H}$  NMR of 9 in  $\text{DMSO-}d_6$  (400 MHz)

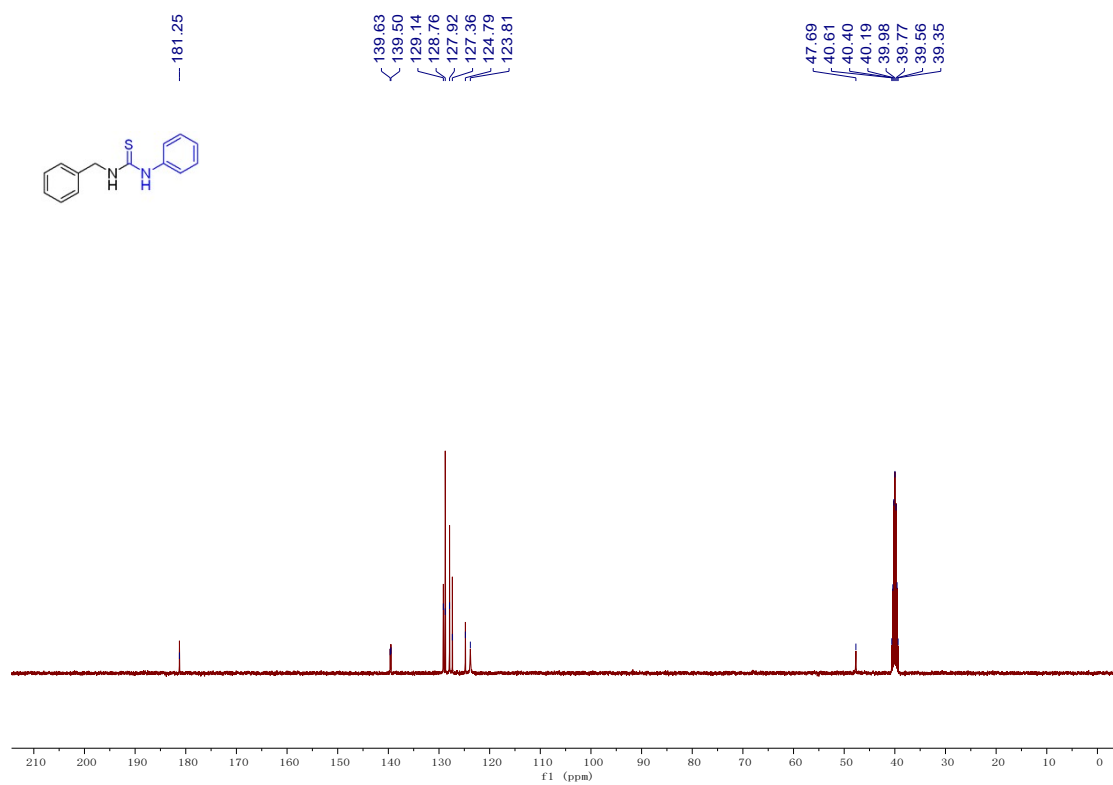

$^{13}\text{C}\{^1\text{H}\}$  NMR of 9 in  $\text{DMSO-}d_6$  (100 MHz)
